# Supplementary material for: Equivalent hazard magnitude scale
Source: Copernicus journal article supplement (doi:10.5194/nhess-22-4103-2022), 2022-12-22
Supplement: Supplementary file 2 [file nhess-22-4103-2022-supplement.zip]

Archive with 11 entries (10 files):
- Supplementary_Material/
- Supplementary_Material/Data_S6.csv
- Supplementary_Material/Data_S2.csv
- Supplementary_Material/Data_S3.csv
- Supplementary_Material/Data_S4.csv
- Supplementary_Material/Supplementary_Material.pdf
- Supplementary_Material/Supplementary_Material.docx
- Supplementary_Material/Data_S5.csv
- Supplementary_Material/Video_S1.mp4
- Supplementary_Material/Data_S1.csv
- nhess-22-4103-2022-supplement-title-page.pdf
