# Supplementary material for: Equivalent hazard magnitude scale
Source: Copernicus journal article supplement (doi:10.5194/nhess-22-4103-2022), 2022-12-22
Supplement: Supplementary file 2 [file nhess-22-4103-2022-supplement.zip › nhess-22-4103-2022-supplement-title-page.pdf]

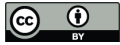

## *Supplement of*

# **Equivalent hazard magnitude scale**

**Yi Victor Wang and Antonia Sebastian**

*Correspondence to:* Yi Victor Wang (ywang2@chapman.edu)

- nhess-22-4103-2022-supplement-title-page.pdf
- Supplementary\_Material
  - Data\_S1.csv
  - Data\_S2.csv
  - Data\_S3.csv
  - Data\_S4.csv
  - Data\_S5.csv
  - Data\_S6.csv
  - Supplementary\_Material.docx
  - Supplementary\_Material.pdf
  - Video\_S1.mp4

The copyright of individual parts of the supplement might differ from the article licence.
