# Supplementary material for: Equivalent hazard magnitude scale
Source: Copernicus journal article supplement (doi:10.5194/nhess-22-4103-2022), 2022-12-22
Supplement: Supplementary file 2 [file nhess-22-4103-2022-supplement.zip › Supplementary_Material/Data_S1.csv]

Variable	Unit	Original_mean	Original_SD	Log_transformed_mean	Log_transformed_SD
Fatality	People	1314.4225	11847.869	3.3892343	2.199871
Total_affected	People	1384493.2	9472041	10.411629	3.1618059
Total_damage	1,000_2019_USD	1361194.9	8446881	11.188907	2.6303513
Notes:
Variable: Impact variable
Unit: Unit of impact variable
Original_mean: Mean of impact variable in its original unit
Original_SD: Standard deviation of impact variable in its original unit
Log_transformed_mean: Mean of logarithmically transformed impact variable
Log_transformed_SD: Standard deviation of logarithmically transformed impact variable
