# Supplementary material for: Equivalent hazard magnitude scale
Source: Copernicus journal article supplement (doi:10.5194/nhess-22-4103-2022), 2022-12-22
Supplement: Supplementary file 2 [file nhess-22-4103-2022-supplement.zip › Supplementary_Material/Data_S2.csv]

Dependent	Independent	a	a_SE	a_t	a_p	b	b_SE	b_t	b_p	Sigma	Sig_SE	Sig_t	Sig_p	R_sq
Fatality	Total_affected	-8.44E-07	0.022441927	3.76E-05	0.99997	0.50955856	0.022441931	22.705647	0	0.8604365	0.015868839	54.221767	0	0.25964952
Fatality	Total_damage	-1.74E-06	0.025037289	6.95E-05	0.9999445	0.2801929	0.025037285	11.191026	5.90E-28	0.9599441	0.017704036	54.221767	0	0.07850791
Total_affected	Fatality	5.07E-07	0.022441914	2.26E-05	0.999982	0.50955796	0.022441905	22.705647	0	0.860436	0.01586883	54.221767	0	0.2596496
Total_affected	Total_damage	-8.96E-07	0.024922773	3.59E-05	0.99997133	0.294817	0.02492277	11.829223	6.66E-31	0.95555353	0.017623061	54.221767	0	0.086917095
Total_damage	Fatality	3.61E-06	0.025037281	0.000144194	0.99988496	0.28019273	0.02503727	11.191026	5.90E-28	0.95994383	0.01770403	54.221767	0	0.07850804
Total_damage	Total_affected	3.36E-06	0.02492278	0.000134735	0.99989253	0.29481715	0.024922784	11.829223	6.66E-31	0.9555538	0.017623067	54.221767	0	0.08691713
Notes:
Each row corresponds to one bi-variate linear regression model for filling in missing values
Dependent: Dependent variable
Independent: Independent variable
a: Point estimate of parameter a
a_SE: Estimate of standard error of point estimate of parameter a
a_t: t-value of point estimate of parameter a
a_p: p-value of point estimate of parameter a
b: Point estimate of parameter b
b_SE: Estimate of standard error of point estimate of parameter b
b_t: t-value of point estimate of parameter b
b_p: p-value of point estimate of parameter b
Sigma: Point estimate of dispersion parameter
Sig_SE: Estimate of standard error of point estimate of dispersion parameter
Sig_t: t-value of point estimate of dispersion parameter
Sig_p: p-value of point estimate dispersion parameter
R_sq: R-squared of regression model
