# Supplementary material for: Equivalent hazard magnitude scale
Source: Copernicus journal article supplement (doi:10.5194/nhess-22-4103-2022), 2022-12-22
Supplement: Supplementary file 2 [file nhess-22-4103-2022-supplement.zip › Supplementary_Material/Data_S3.csv]

Dependent	Independent_1	Independent_2	a	a_SE	a_t	a_p	b	b_SE	b_t	b_p	c	c_SE	c_t	c_p	Sigma	Sig_SE	Sig_t	Sig_p	R_sq
Fatality	Total_affected	Total_damage	-1.32E-06	0.022159776	5.97E-05	0.9999524	0.46759486	0.023190511	20.163197	0	0.142338	0.023190504	6.13777	1.08E-09	0.8496186	0.015669327	54.221767	0	0.27814868
Total_affected	Fatality	Total_damage	-8.89E-08	0.022058422	4.03E-06	0.9999968	0.4633273	0.022978859	20.163198	0	0.16499598	0.022978866	7.180336	1.10E-12	0.8457327	0.01559766	54.221767	0	0.284736
Total_damage	Fatality	Total_affected	3.51E-06	0.024609437	0.000142472	0.99988633	0.17554703	0.028601108	6.13777	1.08E-09	0.20536567	0.028601125	7.1803355	1.10E-12	0.9435401	0.0174015	54.221767	0	0.109732345
Notes:
Each row corresponds to one bi-variate linear regression model for filling in missing values
Dependent: Dependent variable
Independent_1: The first independent variable
Independent_2: The 2nd independent variable
a: Point estimate of parameter a
a_SE: Estimate of standard error of point estimate of parameter a
a_t: t-value of point estimate of parameter a
a_p: p-value of point estimate of parameter a
b: Point estimate of parameter b
b_SE: Estimate of standard error of point estimate of parameter b
b_t: t-value of point estimate of parameter b
b_p: p-value of point estimate of parameter b
c: Point estimate of parameter c
c_SE: Estimate of standard error of point estimate of parameter c
c_t: t-value of point estimate of parameter c
c_p: p-value of point estimate of parameter c
Sigma: Point estimate of dispersion parameter
Sig_SE: Estimate of standard error of point estimate of dispersion parameter
Sig_t: t-value of point estimate of dispersion parameter
Sig_p: p-value of point estimate dispersion parameter
R_sq: R-squared of regression model
