# Supplementary material for: Equivalent hazard magnitude scale
Source: Copernicus journal article supplement (doi:10.5194/nhess-22-4103-2022), 2022-12-22
Supplement: Supplementary file 2 [file nhess-22-4103-2022-supplement.zip › Supplementary_Material/Data_S4.csv]

Hazard	Intercept	Coefficient	Sigma	Int_SE	Coe_SE	Sig_SE	Int_t	Coe_t	Sig_t	Int_p	Coe_p	Sig_p	R_sq
Cold_wave	-0.24040231	-0.011125823	0.859526	0.21713929	0.007961324	0.072643206	1.1071341	1.397484	11.83216	0.27219504	0.16687864	4.55E-18	0.027142195
Convective_storm	-7.5636907	1.3755438	0.78124857	2.1191673	0.43094644	0.09765607	3.5691805	3.1919136	8	0.001270339	0.003387671	8.01E-09	0.24149449
Drought	-0.8833067	0.22060888	1.0161649	0.46910572	0.05238236	0.10832355	1.8829587	4.211511	9.380832	0.066814095	0.000135333	9.25E-12	0.28729734
Earthquake	-3.332788	0.448389	1.2463602	0.23083721	0.036102872	0.024594957	14.437828	12.41976	50.675438	6.90E-44	1.59E-33	0	0.10724858
Extra-tropical_storm	-12.250505	2.2827098	1.3671827	6.6007733	1.296545	0.19733582	1.8559197	1.7606097	6.928203	0.07755402	0.09286216	7.62E-07	0.114385895
Flash_flood	-1.0274601	0.07013629	0.9417181	0.22444405	0.02381619	0.039238255	4.5778008	2.9448993	24	7.03E-06	0.003496927	0	0.02923235
Forest_fire	-1.6116455	0.11307152	0.81465006	0.22206391	0.035495106	0.056759357	7.257575	3.1855526	14.3527	8.63E-11	0.001927397	5.00E-26	0.08968587
Heat_wave	-0.9524179	0.024274133	1.3296869	1.3677984	0.031023113	0.10022891	0.6963145	0.7824531	13.2664995	0.4881316	0.43612272	2.05E-22	0.00690918
Riverine_flood	-1.5284426	0.12264932	1.0140232	0.13487397	0.013278328	0.020926608	11.332377	9.236805	48.456165	2.55E-28	1.16E-19	0	0.06774986
Tornado	-1.7271793	0.16832903	0.85110307	1.5488392	0.29199377	0.07835039	1.1151443	0.5764816	10.862781	0.26955137	0.5665997	2.09E-15	0.00560131
Tropical_cyclone	-4.2569165	0.8016294	1.1718569	0.65099525	0.12734994	0.032627195	6.5390897	6.2946978	35.91657	1.26E-10	5.71E-10	0	0.057876855
Tsunami	-7.0781174	0.9681283	1.205405	2.0107753	0.25284788	0.1483751	3.5200934	3.8288963	8.124039	0.001400023	0.000609727	4.55E-09	0.307602
Notes:
Each row contains statistics of parameters based on model calibration of simple linear egression model for relationship between magnitude indicator and impact metric for one natural hazard
Intercept: Point estimate of intercept
Coefficient: Point estimate of coefficient of magnitude indicator as independent variable
Sigma: Point estimate of dispersion parameter
Int_SE: Estimated standard error of point estimate of intercept
Coe_SE: Estimated standard error of point estimate of coefficient of magnitude indicator
Sig_SE: Estimated standard error of point estimate of dispersion parameter
Int_t: t-value of point estimate of intercept
Coe_t: t-value of point estimate of coefficient of magnitude indicator
Sig_t: t-value of point estimate of dispersion parameter
Int_p: p-value of point estiamte of intercept
Coe_p: p-value of point estimate of coefficient of magnitude indicator
Sig_p: p-value of point estimate of dispersion parameter
R_sq: R-squared of regression model
