# Supplementary material for: Equivalent hazard magnitude scale
Source: Copernicus journal article supplement (doi:10.5194/nhess-22-4103-2022), 2022-12-22
Supplement: Supplementary file 2 [file nhess-22-4103-2022-supplement.zip › Supplementary_Material/Data_S5.csv]

Hazard	Sample_size	Minimum	25th_percentile	Median	75th_percentile	Maximum	Range	Mean	Standard_deviation	Skewness	Kurtosis
Cold_wave	70	4.541447	4.8195925	5.053235	5.225685	5.787539	1.2460918	5.0538707	0.28713545	0.38522395	-0.31944072
Convective_storm	32	1.7504066	2.541845	3.457649	3.7693586	5.741775	3.9913683	3.3722582	0.8816443	0.47336003	0.33034834
Drought	44	3.2333865	6.2675977	6.786069	8.076489	9.073209	5.8398223	6.9680467	1.290345	-0.45610774	0.037121397
Earthquake	1284	1.024758	3.715092	3.715092	4.61187	6.405426	5.380668	4.002843	0.86398107	0.028159866	-0.35979754
Extra-tropical_storm	24	1.5235244	3.2958972	3.863469	4.3804235	5.123163	3.599639	3.720978	0.98269904	-0.7168956	-0.14284545
Flash_flood	288	3.2680693	4.0251026	4.2634273	4.463382	4.8601317	1.5920625	4.2259703	0.3268323	-0.5401505	-0.057348795
Forest_fire	103	1.7767091	2.7690785	3.0665798	3.4267616	4.329815	2.5531058	3.0958376	0.5114076	-0.006971254	-0.16632438
Heat_wave	88	4.7943535	5.0370946	5.231288	5.3769326	5.6682224	0.87386894	5.224116	0.22181778	-0.13326225	-0.8922561
Riverine_flood	1174	2.1131427	4.0882673	4.4620175	4.74104	5.5895486	3.4764059	4.374002	0.5467208	-0.8181602	0.83533335
Tornado	59	3.0960093	3.2325125	3.3293629	3.4272492	3.6205711	0.5245619	3.3268204	0.12775443	-0.000588286	-0.92752725
Tropical_cyclone	645	3.0504613	4.239979	4.7107224	5.10413	5.6573076	2.6068463	4.661192	0.58090246	-0.41382447	-0.5342647
Tsunami	33	2.4613054	6.333819	6.333819	6.333819	10.206332	7.7450266	6.1577954	1.6068658	-0.14722782	0.632736
Note:
Each row contins statistics of derived equivalent magintudes for one natural hazard on the Gardoni Scale
Hazard: Type of natural hazard
Sample_size: Number of data points included in the regression modeling
Minimum: Minimum equivalent magnitude among data points
25th_percentile: 25th percentile of equivalent magnitude among data points
Median: Median of equivalent magnitude among data points
75th_percentile: 75th percentile of equivalent magnitude among data points
Maximum: Maximum equivalent magnitude among data points
Range: Range of equivalent magnitude from minimum to maximum among data points
Mean: Mean of equivalent magnitude among data points
Standard_deviation: Standard deviation of equivalent magnitude among data points
Skewness: Skewness of equivalent magnitude among data points
Kurtosis: Kurtosis of equivalent magnitude among data points
