# Supplementary material for: Equivalent hazard magnitude scale
Source: Copernicus journal article supplement (doi:10.5194/nhess-22-4103-2022), 2022-12-22
Supplement: Supplementary file 2 [file nhess-22-4103-2022-supplement.zip › Supplementary_Material/Data_S6.csv]

ID	Hazard	Year	Seq	Mag_Ind	Mag_Unit	Start_Year	Start_Month	Start_Day	End_Year	End_Month	End_Day	Deaths	Total_Affected	Total_Damage	IM_PC	EIM_PC	EMS_PC
2012-0045-MAR	Cold_wave	2012	45	-1	Degree_C	2012	2		2012	2		17.48501053	7500	50197.81389	-0.5076828	-0.229276486	4.541447028
1995-0001-BGD	Cold_wave	1995	1	-4	Degree_C	1995	1		1995	1		120	92565.75359	115538.9811	0.67894644	-0.195899018	4.608201965
2018-0030-MAR	Cold_wave	2018	30	-5	Degree_C	2018	1	5	2018	1	9	38.59895133	70000	86815.75334	0.2538876	-0.184773195	4.63045361
2000-0456-BRA	Cold_wave	2000	456	-5	Degree_C	2000	7		2000	7		7	11551.61426	44594.71813	-0.70082766	-0.184773195	4.63045361
2000-0486-PRY	Cold_wave	2000	486	-5	Degree_C	2000	7		2000	7		8	12738.38406	46635.00249	-0.6359894	-0.184773195	4.63045361
2001-0482-BOL	Cold_wave	2001	482	-6	Degree_C	2001	7		2001	7		9	5	12517.58667	-2.3867989	-0.173647372	4.652705256
2000-0705-RUS	Cold_wave	2000	705	-7	Degree_C	2000	10	10	2000	10	10	232	94	40871.91194	-0.682624	-0.16252155	4.674956901
1991-0433-BGD	Cold_wave	1991	433	-7	Degree_C	1991	12	24	1992	1	6	182	125582.5229	132840.5726	0.88119185	-0.16252155	4.674956901
1991-0276-PER	Cold_wave	1991	276	-8	Degree_C	1991	6	14	1991	6	14	25	29344.62259	68312.10867	-0.08271942	-0.151395727	4.697208546
2000-0422-URY	Cold_wave	2000	422	-8	Degree_C	2000	7		2000	7		7	400	25104.28126	-1.4676791	-0.151395727	4.697208546
2014-0047-IND	Cold_wave	2014	47	-9	Degree_C	2014	1	20	2014	1	24	24	28480.29466	67384.21327	-0.10254122	-0.140269904	4.719460192
2009-0595-BGD	Cold_wave	2009	595	-9	Degree_C	2009	12	15	2010	1	31	235	130995.3777	215295.3448	1.049932	-0.140269904	4.719460192
2000-0416-BOL	Cold_wave	2000	416	-9	Degree_C	2000	7		2000	7		6	25277	49355.2526	-0.57138157	-0.140269904	4.719460192
2002-0805-MEX	Cold_wave	2002	805	-10	Degree_C	2002	12	24	2002	12	24	50	48752.21859	86168.6683	0.2538491	-0.129144081	4.741711837
2002-0767-ROU	Cold_wave	2002	767	-11	Degree_C	2002	12	7	2002	12	7	10	14999.90508	50254.96853	-0.52763873	-0.118018259	4.763963483
1998-0453-MEX	Cold_wave	1998	453	-13	Degree_C	1998	12		1998	12		100	80995.37765	108692.8731	0.59041727	-0.095766613	4.808466773
1999-0004-MEX	Cold_wave	1999	4	-13	Degree_C	1999	1		1999	1		15	20186.11618	57566.98199	-0.33075872	-0.095766613	4.808466773
2017-0032-MAR	Cold_wave	2017	32	-13	Degree_C	2017	1	15	2017	2	26	95.4560233	900000	162416.5194	1.1246705	-0.095766613	4.808466773
1991-0009-AFG	Cold_wave	1991	9	-15	Degree_C	1991	1	3	1991	1	3	80	200	37186.82683	-0.84965163	-0.073514968	4.852970064
2003-0622-MEX	Cold_wave	2003	622	-15	Degree_C	2003	12		2003	12		21	25826.93191	64436.14961	-0.16737942	-0.073514968	4.852970064
2011-0105-MEX	Cold_wave	2011	105	-15	Degree_C	2011	2	1	2011	2	8	3	120000	500000	-0.032914888	-0.073514968	4.852970064
2012-0485-BGR	Cold_wave	2012	485	-19	Degree_C	2012	12	1	2012	12	15	3	6210.790717	33573.99998	-1.1122466	-0.029011677	4.941976646
2000-0423-CHL	Cold_wave	2000	423	-20	Degree_C	2000	7	3	2000	7	3	18.64502717	16489.08434	10000	-0.63189995	-0.017885854	4.964228291
2011-0007-IND	Cold_wave	2011	7	-20	Degree_C	2011	1	1	2011	1	18	80	68783.7904	100863.5121	0.4820666	-0.017885854	4.964228291
1997-0062-MEX	Cold_wave	1997	62	-20	Degree_C	1997	1	14	1997	1	14	205	137018.7432	138243.7497	0.9389758	-0.017885854	4.964228291
2015-0315-PER	Cold_wave	2015	315	-20	Degree_C	2015	5		2015	9		21	200620	94000	0.30509847	-0.017885854	4.964228291
2016-0001-POL	Cold_wave	2016	1	-20	Degree_C	2016	1	2	2016	1	4	21	25826.93191	64436.14961	-0.16737942	-0.017885854	4.964228291
1991-0034-GRC	Cold_wave	1991	34	-20	Degree_C	1991	2	5	1991	2	5	5	9028.646293	39840.73194	-0.8642071	-0.017885854	4.964228291
2001-0686-HUN	Cold_wave	2001	686	-20	Degree_C	2001	12		2001	12		81	69412.43208	101284.1612	0.4880986	-0.017885854	4.964228291
2004-0010-TUR	Cold_wave	2004	10	-22	Degree_C	2004	1	9	2004	1	10	10	14999.90508	50254.96853	-0.52763873	0.004365791	5.008731582
1963-0055-BEL	Cold_wave	1963	55	-22	Degree_C	1963			1963			12	17142.67601	53420.31814	-0.43910956	0.004365791	5.008731582
2001-0011-IND	Cold_wave	2001	11	-22	Degree_C	2001	1		2001	1		125	95374.96376	117129.9776	0.69876826	0.004365791	5.008731582
2000-0830-POL	Cold_wave	2000	830	-23	Degree_C	2000	12		2000	12		84	71286.04644	102525.7514	0.50575733	0.015491614	5.030983227
2014-0030-POL	Cold_wave	2014	30	-24	Degree_C	2014	1	23	2014	1	27	91	85697.78287	154883.8231	0.6403149	0.026617436	5.053234873
2013-0165-POL	Cold_wave	2013	165	-24	Degree_C	2013	3	1	2013	3	26	25	29344.62259	68312.10867	-0.08271942	0.026617436	5.053234873
1997-0290-MEX	Cold_wave	1997	290	-24	Degree_C	1997	12	13	1997	12	13	87	38348.39207	4000	-0.2035241	0.026617436	5.053234873
2001-0027-AFG	Cold_wave	2001	27	-25	Degree_C	2001	1	31	2001	2	20	150	100000	10	-0.9657665	0.037743259	5.075486518
2001-0713-LVA	Cold_wave	2001	713	-25	Degree_C	2001	10		2001	10		21	25826.93191	64436.14961	-0.16737942	0.037743259	5.075486518
2002-0754-POL	Cold_wave	2002	754	-25	Degree_C	2002	10		2003	1		183	126087.4881	133084.6524	0.88385224	0.037743259	5.075486518
2001-0661-POL	Cold_wave	2001	661	-25	Degree_C	2001	10	10	2002	1	20	270	167640.4648	151606.3688	1.0727065	0.037743259	5.075486518
2001-0692-MKD	Cold_wave	2001	692	-25	Degree_C	2001	12		2001	12		15	20186.11618	57566.98199	-0.33075872	0.037743259	5.075486518
2001-0579-RUS	Cold_wave	2001	579	-26	Degree_C	2001	10		2001	10		332	174	48953.50181	-0.42804426	0.048869082	5.097738164
1997-0005-DEU	Cold_wave	1997	5	-26	Degree_C	1997	1	4	1997	1	4	30	33536.56935	72614.80173	0.005809797	0.048869082	5.097738164
1998-0378-POL	Cold_wave	1998	378	-26	Degree_C	1998	11	29	1998	11	29	64	58413.3256	93598.11133	0.37371576	0.048869082	5.097738164
1999-0613-POL	Cold_wave	1999	613	-27	Degree_C	1999	10		1999	10		154	111120.7381	125610.1261	0.8000761	0.059994905	5.119989809
2003-0339-PER	Cold_wave	2003	339	-28	Degree_C	2003	7	7	2003	8	15	339	1839888	239449.5149	1.6914552	0.071120727	5.142241454
2001-0377-ARG	Cold_wave	2001	377	-28	Degree_C	2001	7		2001	7		14	3000	40967.07123	-0.7874278	0.071120727	5.142241454
1997-0291-RUS	Cold_wave	1997	291	-28	Degree_C	1997	12	17	1997	12	17	22	26722.01514	65448.26845	-0.14479096	0.071120727	5.142241454
1994-0309-RUS	Cold_wave	1994	309	-30	Degree_C	1994	12		1994	12		42	42908.04018	81279.54679	0.16918908	0.093372373	5.186744745
1990-0254-USA	Cold_wave	1990	254	-30	Degree_C	1990	12	20	1990	12	20	25.80167287	26949.88368	40000	-0.18915743	0.093372373	5.186744745
2008-0633-BEL	Cold_wave	2008	633	-31	Degree_C	2009	1		2009	1		132	84643.45185	210040.3215	0.79808384	0.104498195	5.208996391
2001-0663-ROU	Cold_wave	2001	663	-31	Degree_C	2001	12	1	2001	12	1	10	14999.90508	50254.96853	-0.52763873	0.104498195	5.208996391
2008-0007-BGR	Cold_wave	2008	7	-32	Degree_C	2008	1		2008	1		10	14999.90508	50254.96853	-0.52763873	0.115624018	5.231248036
1982-0247-CAN	Cold_wave	1982	247	-34	Degree_C	1982	1	19	1982	1	19	4.837495683	200	20636.39436	-1.7434455	0.137875663	5.275751327
2012-0019-AZE	Cold_wave	2012	19	-34	Degree_C	2012	2		2012	2		462	424389.0263	795018.0514	1.7107332	0.137875663	5.275751327
1998-0406-RUS	Cold_wave	1998	406	-35	Degree_C	1998	11	16	1998	12	28	69	263	37776.61979	-0.8343351	0.149001486	5.298002972
2009-0571-DEU	Cold_wave	2009	571	-35	Degree_C	2009	12	18	2010	1	25	352	251140.3826	364244.845	1.3877784	0.149001486	5.298002972
2004-0331-ARG	Cold_wave	2004	331	-35	Degree_C	2004	7		2004	7		95	2146495.646	225811.5116	1.3548545	0.149001486	5.298002972
2003-0022-LVA	Cold_wave	2003	22	-37	Degree_C	2003	1		2003	1		15	20186.11618	57566.98199	-0.33075872	0.171253132	5.342506263
2014-0009-USA	Cold_wave	2014	9	-37	Degree_C	2014	1	5	2014	1	8	21	53356.36586	2500000	0.64880496	0.171253132	5.342506263
1997-0007-POL	Cold_wave	1997	7	-37	Degree_C	1997	1	4	1997	1	4	50	48752.21859	86168.6683	0.2538491	0.171253132	5.342506263
2010-0050-BGR	Cold_wave	2010	50	-38	Degree_C	2010	1		2010	1		71	80772.10777	209328.6006	0.6146684	0.182378954	5.364757909
1997-0314-KAZ	Cold_wave	1997	314	-38	Degree_C	1997	11		1997	11		82.67481565	600000	147042.0628	0.98642224	0.182378954	5.364757909
2016-0023-CHN	Cold_wave	2016	23	-41	Degree_C	2016	1	20	2016	1	26	110	122708.0156	1886184.684	1.2241789	0.215756422	5.431512845
2001-0017-KAZ	Cold_wave	2001	17	-47	Degree_C	2001	1		2001	1		3	12	11543.33314	-2.5371628	0.282511359	5.565022717
2002-0639-RUS	Cold_wave	2002	639	-50	Degree_C	2002	10		2002	10		242	25062	107084.495	0.60448647	0.315888827	5.631777653
2009-0632-MNG	Cold_wave	2009	632	-50	Degree_C	2009	12		2010	5		5	769113	62000	0.090905175	0.315888827	5.631777653
1999-0068-RUS	Cold_wave	1999	68	-50	Degree_C	1999	1		1999	1		88.41197732	725000	154027.7302	1.0509467	0.315888827	5.631777653
2010-0615-POL	Cold_wave	2010	615	-51	Degree_C	2010	11		2011	2		211	134574.1444	152043.6136	0.96103096	0.327014649	5.654029299
2001-0018-RUS	Cold_wave	2001	18	-57	Degree_C	2001	1		2001	2		145	6120	100	-1.100433	0.393769586	5.787539171
2004-0062-IDN	Convective_storm	2004	62	75	km/h	2004	2	3	2004	2	5	4	2400	30316.48956	-1.237403	-1.624796675	1.750406649
2017-0151-RUS	Convective_storm	2017	151	79	km/h	2017	5	29	2017	5	29	16	201	2000	-1.8373294	-1.553324088	1.893351825
2000-0611-MEX	Convective_storm	2000	611	88	km/h	2000	9	21	2000	9	21	8	300	24579.60375	-1.4907365	-1.404917802	2.190164396
2015-0400-USA	Convective_storm	2015	400	95	km/h	2015	8	2	2015	8	4	4	40	950000	-1.4079618	-1.29963369	2.400732621
2010-0690-USA	Convective_storm	2010	690	97	km/h	2010	5	10	2010	5	16	20	24920.36344	63391.4517	-0.19107026	-1.270975653	2.458048695
2017-0407-ROU	Convective_storm	2017	407	100	km/h	2017	9	17	2017	9	17	9	137	7300	-1.8353562	-1.229077409	2.541845183
2015-0263-POL	Convective_storm	2015	263	100	km/h	2015	7	19	2015	7	19	1	1217	20179.99442	-1.8338796	-1.229077409	2.541845183
2019-0532-CAN	Convective_storm	2019	532	100	km/h	2019	10	31	2019	11	2	1	4534.849434	275000	-1.0943959	-1.229077409	2.541845183
2019-0186-ESP	Convective_storm	2019	186	100	km/h	2019	4	18	2019	4	22	5.714625612	320	23157.77476	-1.583192	-1.229077409	2.541845183
2012-0420-ARG	Convective_storm	2012	420	110	km/h	2012	10	29	2012	10	31	1	7510	2000	-1.9017574	-1.097974039	2.804051921
2010-0125-AUS	Convective_storm	2010	125	120	km/h	2010	3	22	2010	3	22	59.25846259	94764.67116	1390000	0.94402903	-0.978286134	3.043427731
2017-0360-AUT	Convective_storm	2017	360	126	km/h	2017	8	19	2017	8	19	2	120	15711.45753	-2.1413014	-0.911173383	3.177653234
2009-0230-AUS	Convective_storm	2009	230	130	km/h	2009	5	19	2009	5	28	1	15000	60000	-1.1395588	-0.868183704	3.263632592
2013-0155-PRT	Convective_storm	2013	155	130	km/h	2013	1	18	2013	1	19	1	3967	24694.18358	-1.5644486	-0.868183704	3.263632592
2015-0148-AUS	Convective_storm	2015	148	135	km/h	2015	4	20	2015	4	28	7	1000	1300000	-0.5608511	-0.816270364	3.367459271
2015-0160-CHN	Convective_storm	2015	160	139	km/h	2015	4	4	2015	4	5	7	2537	20000	-1.1464251	-0.776105691	3.447788617
1994-0127-AUS	Convective_storm	1994	127	140	km/h	1994	5	25	1994	5	25	2	240220	77600	-0.3530029	-0.76624539	3.467509219
1991-0131-MDV	Convective_storm	1991	131	144	km/h	1991	5	27	1991	6	9	23.96093499	23849	30000	-0.28687015	-0.72749486	3.545010279
1996-0455-USA	Convective_storm	1996	455	146	km/h	1996	4	27	1996	4	27	6	10318.40918	42350.13248	-0.7756781	-0.70852134	3.582957319
2012-0503-USA	Convective_storm	2012	503	146	km/h	2012	6	28	2012	7	2	28	70936.52004	4000000	0.8718491	-0.70852134	3.582957319
2015-0164-IND	Convective_storm	2015	164	150	km/h	2015	4	21	2015	4	21	100	125100	160000	0.7470553	-0.671342372	3.657315257
2000-0714-GBR	Convective_storm	2000	714	150	km/h	2000	10	28	2000	10	29	12	19504	1500000	0.20028767	-0.671342372	3.657315257
2012-0120-JPN	Convective_storm	2012	120	150	km/h	2012	4	3	2012	4	4	4	372	22047.01535	-1.6625042	-0.671342372	3.657315257
2008-0165-FRA	Convective_storm	2008	165	155	km/h	2008	3	10	2008	3	10	2	4615.115729	29309.51355	-1.3091265	-0.626238693	3.747522613
2009-0506-GBR	Convective_storm	2009	506	160	km/h	2009	11	13	2009	12	4	2	180	16838.40957	-2.0488482	-0.582566868	3.834866265
1995-0051-BGD	Convective_storm	1995	51	160	km/h	1995	4	12	1995	4	12	50	51500	86979.66425	0.26635134	-0.582566868	3.834866265
2018-0002-CHE	Convective_storm	2018	2	163	km/h	2018	1	3	2018	1	4	9.97574209	4661.115729	240416.6677	-0.46986908	-0.557014566	3.885970867
2012-0462-PRY	Convective_storm	2012	462	180	km/h	2012	9	18	2012	9	19	5	25100	2000	-1.2140554	-0.420551097	4.158897805
2015-0081-ITA	Convective_storm	2015	81	200	km/h	2015	3	2	2015	3	9	3	11841.16998	869000	-0.38636875	-0.275623105	4.448753791
2019-0484-USA	Convective_storm	2019	484	220	km/h	2019	10	20	2019	10	21	4	17823.45196	2600000	-0.023681574	-0.144519735	4.710960529
2019-0624-USA	Convective_storm	2019	624	260	km/h	2019	12	16	2019	12	18	18	30126.0418	235000	0.05796431	0.0852706	5.1705412
2010-0187-USA	Convective_storm	2010	187	320	km/h	2010	4	30	2010	5	3	30	8000	2350000	0.36426762	0.370887436	5.741774873
1998-9223-SLB	Drought	1998	9223	1	km^2	1998	8		1998			6.073622945	380	24154.70057	-1.5245976	-0.883306686	3.233386627
1998-9216-CRI	Drought	1998	9216	30	km^2	1998	5		1998			22.66361474	22150.67916	23000	-0.36589286	-0.132972335	4.734055329
1998-9062-MYS	Drought	1998	9062	30	km^2	1998	3		1998			15.14383294	5000	45446.05623	-0.64593095	-0.132972335	4.734055329
1994-9096-CHN	Drought	1994	9096	100	km^2	1994	1		1994	12		702.7771291	82000000	13755200	3.3877044	0.132634757	5.265269515
2002-9838-HND	Drought	2002	9838	128	km^2	2002	1		2002			40.82606319	82000	90250.98705	0.307836	0.187094271	5.374188542
1991-9195-LAO	Drought	1991	9195	132	km^2	1991	7		1993			10.86991493	7291.428591	1000	-1.3672794	0.193882788	5.387765577
1997-9227-NIC	Drought	1997	9227	134	km^2	1997	9		1997			39.1258651	290000	2000	-0.15715984	0.197200308	5.394400615
2002-9164-PHL	Drought	2002	9164	178	km^2	2002	3		2002	3		9.028950853	5507.308273	453	-1.6201777	0.259840799	5.519681597
2002-9564-CHN	Drought	2002	9564	659	km^2	2002	9		2002			95.4560233	900000	162416.5194	1.1246705	0.548604569	6.097209138
2000-9494-UZB	Drought	2000	9494	860	km^2	2000	8		2001	8		72.71180343	600000	50000	0.7518719	0.607332561	6.214665121
2001-9122-MOZ	Drought	2001	9122	900	km^2	2002	3		2002			9	600000	92316.97608	0.27992916	0.617362016	6.234724031
1998-9210-CUB	Drought	1998	9210	994	km^2	1998	1		1998			93.74860252	820000	180000	1.1202459	0.639277819	6.278555639
1999-9171-MEX	Drought	1999	9171	1200	km^2	1999	5		2000			38.31899398	65000	100000	0.2633137	0.680827231	6.361654463
1999-9084-VNM	Drought	1999	9084	1650	km^2	1999	1		1999			111.6433808	1400000	181005.8142	1.2753189	0.751080965	6.502161929
2000-9495-ARM	Drought	2000	9495	1720	km^2	2000	6		2000			62.81807536	297000	100000	0.7003266	0.760246983	6.520493966
2002-9485-KHM	Drought	2002	9485	2000	km^2	2002	1		2002	7		72.23138742	650000	38000	0.7152216	0.793519902	6.587039803
2002-9203-CHN	Drought	2002	9203	2200	km^2	2002	4		2002			423.0954286	60000000	454953.2536	2.5566108	0.81454618	6.629092361
2001-9383-HND	Drought	2001	9383	2487	km^2	2001	7		2004			168.2087922	783000	244634.8706	1.3313004	0.841597159	6.683194319
2000-9186-TJK	Drought	2000	9186	2500	km^2	2000	5		2001			124.6748819	3000000	57000	1.2432891	0.842747356	6.685494712
1999-9122-IRN	Drought	1999	9122	2500	km^2	1999	4		2001			457.6953415	37000000	3300000	2.848413	0.842747356	6.685494712
1994-9223-KHM	Drought	1994	9223	3000	km^2	1994	6		1996			157.4039827	5000000	100000	1.5124457	0.882969108	6.765938217
1990-9707-PHL	Drought	1990	9707	3046	km^2	1990	12		1992	7		56.63315925	254282	64000	0.5586206	0.886326076	6.772652151
1991-9476-USA	Drought	1991	9476	3237	km^2	1991	1		1991	7		54.85759185	84326.54678	1000000	0.8388589	0.899743004	6.799486008
2002-9158-THA	Drought	2002	9158	4500	km^2	2002	2		2002			100.4594249	5000000	2300	0.6922095	0.972418315	6.94483663
1997-9244-IDN	Drought	1997	9244	4891	km^2	1997	9		1997	11		672	1065000	88000	1.5912292	0.990799373	6.981598745
2003-9360-CHN	Drought	2003	9360	8600	km^2	2003	7		2003			146.2786217	3000000	218209.0649	1.5351796	1.115303388	7.230606775
1993-9522-THA	Drought	1993	9522	13000	km^2	1993			1993			12.78699771	9321.650912	2000	-1.1459082	1.206456114	7.412912229
1998-9324-FJI	Drought	1998	9324	13700	km^2	1998	1		1998			61.75148789	263455	120163.8274	0.7057945	1.218026248	7.436052496
2005-9153-THA	Drought	2005	9153	21600	km^2	2005	1		2005	3		44.76619303	62008.3161	420000	0.5618042	1.318468912	7.636937825
2000-9328-ROU	Drought	2000	9328	26000	km^2	2000	6		2000			46.63310281	65960.52933	500000	0.61748755	1.359370432	7.718740863
2000-9531-CHN	Drought	2000	9531	26000	km^2	2000	8		2000			175.3208111	5000000	247334.0986	1.7093519	1.359370432	7.718740863
2000-9267-CHN	Drought	2000	9267	32650	km^2	2000	4		2000			288.0681531	15000000	796115	2.2795353	1.409613855	7.819227709
1992-9090-CHN	Drought	1992	9090	58000	km^2	1992			1993			27.58486541	29815.89989	53200	-0.09807949	1.536375133	8.072750267
1997-9557-CHN	Drought	1997	9557	60000	km^2	1997	5		1997	8		36.17115131	44919.07875	169100	0.2712514	1.543854253	8.087708505
1996-9328-IND	Drought	1996	9328	72000	km^2	1996	3		1996	4		47.53111928	67890.88694	542400	0.643483	1.584076005	8.16815201
1999-9079-CHN	Drought	1999	9079	90000	km^2	1999	3		1999			281.4398677	19000000	343149.3785	2.1645365	1.633303459	8.266606919
1988-9237-CHN	Drought	1988	9237	113000	km^2	1988	6		1988			1400	49000000	942887	2.9859445	1.683509223	8.367018445
1992-9128-CHN	Drought	1992	9128	130000	km^2	1992	5		1992			239.1281685	12000000	306574.1931	2.0078535	1.714426731	8.428853462
1994-9186-CHN	Drought	1994	9186	140000	km^2	1994	3		1995			194.3865836	6690000	265643.3534	1.8086319	1.730775641	8.461551282
1995-9138-CHN	Drought	1995	9138	200000	km^2	1995	1		1995	8		149.5282567	9060000	12800	1.2364289	1.809461345	8.618922691
2001-9218-CHN	Drought	2001	9218	233000	km^2	2001	3		2001			263.6263345	15800000	327973.3335	2.101653	1.843152833	8.686305666
1997-9263-PNG	Drought	1997	9263	452800	km^2	1997	9		1998			60	500000	133257.3602	0.842725	1.989728129	8.979456258
2003-9064-CHN	Drought	2003	9064	500000	km^2	2003	1		2003	1		390.9134	48000000	430723.2938	2.4805274	2.011603117	9.023206234
2002-9349-IND	Drought	2002	9349	560000	km^2	2002	7		2002			775.7469752	300000000	910722	3.1704495	2.036604486	9.073208972
1999-0047-RUS	Earthquake	1999	47	3	Richter	1999	2	2	1999	2	2	10.20415928	6240	900	-1.434979	-1.987621024	1.024757952
2013-0121-HUN	Earthquake	2013	121	4	Richter	2013	4	14	2013	4	23	10.54218457	1800	35373.15599	-0.9942753	-1.539232029	1.921535942
2001-0005-TZA	Earthquake	2001	5	4	Richter	2001	1	5	2001	1	5	7.542415217	700	28059.07628	-1.3163009	-1.539232029	1.921535942
1990-0703-USA	Earthquake	1990	703	4	Richter	1990	3	30	1990	3	30	4.036156326	120	18206.33847	-1.9176177	-1.539232029	1.921535942
1987-0306-DZA	Earthquake	1987	306	4	Richter	1987	1	26	1987	1	26	1	3152	1000	-2.200032	-1.539232029	1.921535942
1981-0127-PAK	Earthquake	1981	127	4	Richter	1981	12	12	1981	12	12	6	237	22225.94994	-1.6361328	-1.539232029	1.921535942
2017-0349-ITA	Earthquake	2017	349	4	Richter	2017	8	23	2017	8	23	2	2642	26645.3271	-1.4363152	-1.539232029	1.921535942
1993-0184-CRI	Earthquake	1993	184	4	Richter	1993	7	10	1993	7	10	3	240	19257.84934	-1.8540815	-1.539232029	1.921535942
1991-0682-YEM	Earthquake	1991	682	4	Richter	1991	11	22	1991	11	22	10	40039	59432.92479	-0.3037682	-1.539232029	1.921535942
2006-0699-SLV	Earthquake	2006	699	4	Richter	2006	12	17	2006	12	17	23.10924105	16470	60879.97118	-0.23946896	-1.539232029	1.921535942
1999-0434-PER	Earthquake	1999	434	4	Richter	1999	10	31	1999	10	31	10.63280934	6580	1100	-1.376085	-1.539232029	1.921535942
2004-0147-TJK	Earthquake	2004	147	4	Richter	2004	4	1	2004	4	1	4.660130217	180	20109.95992	-1.7793695	-1.539232029	1.921535942
2010-0667-CHN	Earthquake	2010	667	4	Richter	2010	1	17	2010	1	17	8	9	13501.94016	-2.2902954	-1.539232029	1.921535942
1990-0704-ZAF	Earthquake	1990	704	4	Richter	1990	10	18	1990	10	18	10	6	13202.40007	-2.3116612	-1.539232029	1.921535942
1982-0106-ITA	Earthquake	1982	106	4	Richter	1982	10	17	1982	10	17	14.6802337	5000	35000	-0.70272124	-1.539232029	1.921535942
1972-0150-ITA	Earthquake	1972	150	4	Richter	1972	6	21	1972	6	21	2	7320.170357	300000	-0.7902236	-1.539232029	1.921535942
2002-0680-ITA	Earthquake	2002	680	4	Richter	2002	10	29	2002	10	29	8.586332895	1009	30691.58743	-1.1916332	-1.539232029	1.921535942
1997-0368-ARM	Earthquake	1997	368	4	Richter	1997	7	18	1997	7	18	20.86577878	15000	33333	-0.39733568	-1.539232029	1.921535942
1985-0194-TUR	Earthquake	1985	194	4	Richter	1985	11	7	1985	11	7	7.051638556	579	26782.98331	-1.3810079	-1.539232029	1.921535942
2000-0023-BGD	Earthquake	2000	23	4	Richter	2000	1	2	2000	1	2	8.559101681	1000	30624.21746	-1.1946882	-1.539232029	1.921535942
1998-0586-NIC	Earthquake	1998	586	4	Richter	1998	3	25	1998	3	25	5.145226128	238	21535.88262	-1.684134	-1.539232029	1.921535942
2002-0545-EGY	Earthquake	2002	545	4	Richter	2002	8	24	2002	8	24	5.235743542	250	21797.27656	-1.6673621	-1.539232029	1.921535942
1980-0109-IRN	Earthquake	1980	109	5	Richter	1980	12	22	1980	12	22	4	100	17614.66931	-1.962057	-1.090843034	2.818313932
2005-0651-CHN	Earthquake	2005	651	5	Richter	2005	11	26	2005	11	26	16	615500	104621.9965	0.46903965	-1.090843034	2.818313932
1989-0027-SUN	Earthquake	1989	27	5	Richter	1989	1	23	1989	1	23	274	12051	24800	0.2260067	-1.090843034	2.818313932
2005-0740-CHN	Earthquake	2005	740	5	Richter	2005	8	5	2005	8	5	24.08555754	18509	62647.91728	-0.199673	-1.090843034	2.818313932
2006-0061-CHN	Earthquake	2006	61	5	Richter	2006	1	12	2006	1	12	28.3879902	68761	6900	-0.3018624	-1.090843034	2.818313932
1980-0124-USA	Earthquake	1980	124	5	Richter	1980	7	27	1980	7	27	0.945269105	2	6669.735476	-3.3136342	-1.090843034	2.818313932
1952-0009-TUR	Earthquake	1952	9	5	Richter	1952	10	22	1952	10	22	20	24920.36344	63391.4517	-0.19107026	-1.090843034	2.818313932
2004-0670-SVN	Earthquake	2004	670	5	Richter	2004	7	12	2004	7	12	1	605	10000	-2.1005292	-1.090843034	2.818313932
2005-0132-ZAF	Earthquake	2005	132	5	Richter	2005	3	9	2005	3	9	2	58	20000	-2.239777	-1.090843034	2.818313932
2004-0011-DZA	Earthquake	2004	11	5	Richter	2004	1	10	2004	1	10	5.585353486	300	22794.098	-1.6051973	-1.090843034	2.818313932
2004-0088-IDN	Earthquake	2004	88	5	Richter	2004	2	16	2004	2	16	5	507	24359.25581	-1.5208188	-1.090843034	2.818313932
2004-0250-RUS	Earthquake	2004	250	5	Richter	2004	5	31	2004	5	31	4.241186002	138	18841.24118	-1.8699642	-1.090843034	2.818313932
2004-0308-TUR	Earthquake	2004	308	5	Richter	2004	7	1	2004	7	1	18	356	30005.19174	-1.1933722	-1.090843034	2.818313932
2004-0406-CHN	Earthquake	2004	406	5	Richter	2004	8	10	2004	8	10	4	120600	50000	-0.37534672	-1.090843034	2.818313932
2004-0426-COL	Earthquake	2004	426	5	Richter	2004	8	18	2004	8	18	1	502	17346.65184	-2.0357995	-1.090843034	2.818313932
2005-0240-SLV	Earthquake	2005	240	5	Richter	2005	5	5	2005	5	5	1	751	18582.44792	-1.9439529	-1.090843034	2.818313932
2004-0436-AFG	Earthquake	2004	436	5	Richter	2004	7	18	2004	7	18	2	1040	22721.93661	-1.6488998	-1.090843034	2.818313932
2004-0571-CHN	Earthquake	2004	571	5	Richter	2004	9	7	2004	9	7	25.61495822	22019	65373.69463	-0.14046545	-1.090843034	2.818313932
2004-0620-DZA	Earthquake	2004	620	5	Richter	2004	12	1	2004	12	1	1.931048798	15	10932.72601	-2.6266284	-1.090843034	2.818313932
2004-0669-DEU	Earthquake	2004	669	5	Richter	2004	12	5	2004	12	5	4.129947792	150	12000	-1.9440767	-1.090843034	2.818313932
2004-0671-BDI	Earthquake	2004	671	5	Richter	2004	2	24	2004	2	24	3	120	17107.15679	-2.0121317	-1.090843034	2.818313932
2005-0016-IRN	Earthquake	2005	16	5	Richter	2005	1	10	2005	1	10	3.913548593	110	17821.92084	-1.9472853	-1.090843034	2.818313932
1980-0100-PER	Earthquake	1980	100	5	Richter	1980	11	9	1980	11	9	7	3000	35420.04188	-1.0082448	-1.090843034	2.818313932
2004-0522-CHN	Earthquake	2004	522	5	Richter	2004	10	18	2004	10	18	43.80379799	100012	94755.18319	0.3755412	-1.090843034	2.818313932
1980-0184-VEN	Earthquake	1980	184	5	Richter	1980	11	26	1980	11	26	4.714620686	186	20272.33882	-1.7681895	-1.090843034	2.818313932
2006-0475-CHN	Earthquake	2006	475	5	Richter	2006	8	25	2006	8	25	1	45551	37471.25149	-1.0078968	-1.090843034	2.818313932
2006-0149-DZA	Earthquake	2006	149	5	Richter	2006	3	20	2006	3	20	4	319	21475.60605	-1.6975511	-1.090843034	2.818313932
1982-0141-HND	Earthquake	1982	141	5	Richter	1982	4	27	1982	4	27	6.694270786	500	25836.49623	-1.4310251	-1.090843034	2.818313932
2009-0493-IRN	Earthquake	2009	493	5	Richter	2009	11	3	2009	11	3	5.373494823	269	22192.41593	-1.6423864	-1.090843034	2.818313932
1943-0007-PER	Earthquake	1943	7	5	Richter	1943	1	30	1943	1	30	200	134563.1444	137104.8364	0.92698574	-1.090843034	2.818313932
2009-0156-AFG	Earthquake	2009	156	5	Richter	2009	4	16	2009	4	16	22	3309	45804.78032	-0.62108463	-1.090843034	2.818313932
1994-0599-USA	Earthquake	1994	599	5	Richter	1994	12	26	1994	12	26	3.829324823	225	2100	-2.2064412	-1.090843034	2.818313932
2009-0059-CHN	Earthquake	2009	59	5	Richter	2009	1	25	2009	1	25	10.66741411	4549	3100	-1.2569715	-1.090843034	2.818313932
1994-0642-AUS	Earthquake	1994	642	5	Richter	1994	8	6	1994	8	6	15.17063469	5025	45501.68256	-0.64423037	-1.090843034	2.818313932
1982-0031-IDN	Earthquake	1982	31	5	Richter	1982	2	24	1982	2	24	15.95564728	15000	3500	-0.8873961	-1.090843034	2.818313932
2008-0588-CHN	Earthquake	2008	588	5	Richter	2008	12	25	2008	12	25	27.59649863	27169	68831.88	-0.06880515	-1.090843034	2.818313932
1944-0045-IRN	Earthquake	1944	45	5	Richter	1944	4	5	1944	4	5	20	24920.36344	63391.4517	-0.19107026	-1.090843034	2.818313932
1981-0224-ITA	Earthquake	1981	224	5	Richter	1981	2	14	1981	2	14	12	17142.67601	53420.31814	-0.43910956	-1.090843034	2.818313932
1981-0211-PER	Earthquake	1981	211	5	Richter	1981	4	18	1981	4	18	8	15	14733.24198	-2.1738176	-1.090843034	2.818313932
2008-0403-IDN	Earthquake	2008	403	5	Richter	2008	9	9	2008	9	9	2	625	20828.69488	-1.7650121	-1.090843034	2.818313932
1981-0091-COL	Earthquake	1981	91	5	Richter	1981	10	18	1981	10	18	10	14999.90508	50254.96853	-0.52763873	-1.090843034	2.818313932
2008-0178-IRN	Earthquake	2008	178	5	Richter	2008	5	1	2008	5	1	4.566645559	170	19830.00954	-1.7988583	-1.090843034	2.818313932
1981-0057-PER	Earthquake	1981	57	5	Richter	1981	6	22	1981	6	22	10	12256	48549.96957	-0.5737048	-1.090843034	2.818313932
2007-0692-GBR	Earthquake	2007	692	5	Richter	2007	4	28	2007	4	28	15.12668702	4501	60000	-0.6157635	-1.090843034	2.818313932
1995-0449-JPN	Earthquake	1995	449	5	Richter	1995	4	1	1995	4	1	10.00014484	1551	34104.75677	-1.04504	-1.090843034	2.818313932
2006-0239-IRN	Earthquake	2006	239	5	Richter	2006	5	7	2006	5	7	3.334094259	70	15951.83928	-2.1013951	-1.090843034	2.818313932
2006-0397-CHN	Earthquake	2006	397	5	Richter	2006	7	22	2006	7	22	22	265106	96862.44601	0.3784292	-1.090843034	2.818313932
2006-0464-CHN	Earthquake	2006	464	5	Richter	2006	6	20	2006	6	20	4.152334065	130	18567.28755	-1.8903261	-1.090843034	2.818313932
2006-0586-CHN	Earthquake	2006	586	5	Richter	2006	10	27	2006	10	27	24.7562964	20000	63849.72	-0.1732572	-1.090843034	2.818313932
2006-0620-CHN	Earthquake	2006	620	5	Richter	2006	11	3	2006	11	3	11.03567064	12000	291	-1.4923925	-1.090843034	2.818313932
2006-0148-BGR	Earthquake	2006	148	5	Richter	2006	2	20	2006	2	20	6.820260986	527	26171.91792	-1.4130931	-1.090843034	2.818313932
1980-0319-SUN	Earthquake	1980	319	5	Richter	1980			1980			87	40083.68116	5000	-0.15374078	-1.090843034	2.818313932
2007-0287-TJK	Earthquake	2007	287	5	Richter	2007	7	21	2007	7	21	11	7003	45014.29606	-0.6709583	-1.090843034	2.818313932
1995-0047-ECU	Earthquake	1995	47	5	Richter	1995	3	26	1995	3	26	1	85	12806.90759	-2.4407482	-1.090843034	2.818313932
2007-0461-HND	Earthquake	2007	461	5	Richter	2007	9	15	2007	9	15	10.71202534	1883	35766.42371	-0.9789047	-1.090843034	2.818313932
2007-0485-IDN	Earthquake	2007	485	5	Richter	2007	9	9	2007	9	9	6.544075107	469	25434.07876	-1.4528484	-1.090843034	2.818313932
2007-0653-BRA	Earthquake	2007	653	5	Richter	2007	12	9	2007	12	9	1	286	15756.9221	-2.1640844	-1.090843034	2.818313932
2007-0654-JPN	Earthquake	2007	654	5	Richter	2007	4	15	2007	4	15	4.846056821	201	20661.65251	-1.741745	-1.090843034	2.818313932
1995-0054-COL	Earthquake	1995	54	5	Richter	1995	3	4	1995	3	4	8	259	23970.17381	-1.5242449	-1.090843034	2.818313932
1997-0531-CHN	Earthquake	1997	531	5	Richter	1997	3	1	1997	3	1	2	20006	37655.99225	-0.97469336	-1.090843034	2.818313932
1979-0094-GTM	Earthquake	1979	94	5	Richter	1979	10	9	1979	10	9	11.02052202	2040	36475.87376	-0.9515994	-1.090843034	2.818313932
2003-0648-TUR	Earthquake	2003	648	5	Richter	2003	7	26	2003	7	26	5.160513146	240	21580.12695	-1.6812807	-1.090843034	2.818313932
1977-0052-TUR	Earthquake	1977	52	5	Richter	1977	3	26	1977	3	26	30	33536.56935	72614.80173	0.005809797	-1.090843034	2.818313932
1968-0082-YUG	Earthquake	1968	82	5	Richter	1968	11	3	1968	11	3	1	15030	38600	-1.2203782	-1.090843034	2.818313932
2002-0107-IRN	Earthquake	2002	107	5	Richter	2002	2	17	2002	2	17	1	780	18703.12426	-1.9353136	-1.090843034	2.818313932
2002-0042-RWA	Earthquake	2002	42	5	Richter	2002	1	17	2002	1	17	45	1643	47227.80339	-0.5527489	-1.090843034	2.818313932
2002-0015-TJK	Earthquake	2002	15	5	Richter	2002	1	9	2002	1	9	3	1050	24780.88099	-1.5175482	-1.090843034	2.818313932
1999-0196-AZE	Earthquake	1999	196	5	Richter	1999	6	4	1999	6	4	1	9168	5000	-1.6938431	-1.090843034	2.818313932
1999-0228-BGD	Earthquake	1999	228	5	Richter	1999	7	22	1999	7	22	6	15200	45247.69346	-0.68735176	-1.090843034	2.818313932
2001-0750-IRN	Earthquake	2001	750	5	Richter	2001	10	8	2001	10	8	8.559101681	1000	30624.21746	-1.1946882	-1.090843034	2.818313932
2001-0748-TUR	Earthquake	2001	748	5	Richter	2001	7	10	2001	7	10	4.163629973	131	18602.2153	-1.8877134	-1.090843034	2.818313932
2001-0546-IDN	Earthquake	2001	546	5	Richter	2001	6	28	2001	6	28	20.96361796	12512	56911.2607	-0.33318335	-1.090843034	2.818313932
2001-0389-CHN	Earthquake	2001	389	5	Richter	2001	7	14	2001	7	14	26.79436263	25000	67441.52786	-0.097173534	-1.090843034	2.818313932
1999-0376-TUR	Earthquake	1999	376	5	Richter	1999	10	5	1999	10	5	3.823374651	103	17536.82227	-1.969704	-1.090843034	2.818313932
2001-0233-AFG	Earthquake	2001	233	5	Richter	2001	6	1	2001	6	1	4	270	20872.35798	-1.7355775	-1.090843034	2.818313932
1999-0383-CHN	Earthquake	1999	383	5	Richter	1999	3	11	1999	3	11	22.87477297	16003	60451.98553	-0.24927667	-1.090843034	2.818313932
1999-0386-TUR	Earthquake	1999	386	5	Richter	1999	8	31	1999	8	31	1	166	14358.44912	-2.2881274	-1.090843034	2.818313932
2000-0743-TJK	Earthquake	2000	743	5	Richter	2000	10	30	2000	10	30	16.15504371	6000	47524.37325	-0.5837662	-1.090843034	2.818313932
2000-0598-USA	Earthquake	2000	598	5	Richter	2000	9	3	2000	9	3	25.91509955	25174	50000	-0.16024452	-1.090843034	2.818313932
1999-0553-CHN	Earthquake	1999	553	5	Richter	1999	11	29	1999	11	29	7.908069339	800	28993.23156	-1.2707717	-1.090843034	2.818313932
2000-0036-CHN	Earthquake	2000	36	5	Richter	2000	1	26	2000	1	26	1	10302	483	-2.1012309	-1.090843034	2.818313932
2000-0041-CHN	Earthquake	2000	41	5	Richter	2000	1	11	2000	1	11	36.97974154	62030	84279.73633	0.21267322	-1.090843034	2.818313932
2000-0051-IRN	Earthquake	2000	51	5	Richter	2000	2	2	2000	2	2	1	2015	21995.4974	-1.7189059	-1.090843034	2.818313932
1972-0084-ITA	Earthquake	1972	84	5	Richter	1972	2	4	1972	2	4	1	450	17025.58128	-2.060734	-1.090843034	2.818313932
2000-0065-IRN	Earthquake	2000	65	5	Richter	2000	2	14	2000	2	14	8.559101681	1000	30624.21746	-1.1946882	-1.090843034	2.818313932
2002-0246-IRN	Earthquake	2002	246	5	Richter	2002	4	24	2002	4	24	2	20056	37672.05428	-0.97412425	-1.090843034	2.818313932
2000-0272-TUR	Earthquake	2000	272	5	Richter	2000	5	7	2000	5	7	1	1000	19514.14012	-1.8786597	-1.090843034	2.818313932
2000-0387-NIC	Earthquake	2000	387	5	Richter	2000	7	6	2000	7	6	7	7477	41400.71872	-0.8000141	-1.090843034	2.818313932
1971-0014-ITA	Earthquake	1971	14	5	Richter	1971	2	6	1971	2	6	22	4220	41600	-0.5910109	-1.090843034	2.818313932
2000-0449-IDN	Earthquake	2000	449	5	Richter	2000	7	12	2000	7	12	9.807155575	4124	2000	-1.3804771	-1.090843034	2.818313932
1970-0133-PER	Earthquake	1970	133	5	Richter	1970	2	14	1970	2	14	12	17142.67601	53420.31814	-0.43910956	-1.090843034	2.818313932
1970-0112-IND	Earthquake	1970	112	5	Richter	1970	3	23	1970	3	23	26	200	29372.03299	-1.207704	-1.090843034	2.818313932
2000-0527-CHN	Earthquake	2000	527	5	Richter	2000	8	21	2000	8	21	1	177611	43000	-0.7150826	-1.090843034	2.818313932
1971-0140-IDN	Earthquake	1971	140	5	Richter	1971	6	16	1971	6	16	1	6891	27137.33006	-1.4385356	-1.090843034	2.818313932
2002-0247-GEO	Earthquake	2002	247	5	Richter	2002	4	25	2002	4	25	6	19156	350000	-0.2652221	-1.090843034	2.818313932
1968-0042-IRN	Earthquake	1968	42	5	Richter	1968	4	29	1968	4	29	38	5100	1000	-1.0871907	-1.090843034	2.818313932
1998-0588-TUR	Earthquake	1998	588	5	Richter	1998	12	14	1998	12	14	2	690	21183.76612	-1.7424523	-1.090843034	2.818313932
1989-0045-IDN	Earthquake	1989	45	5	Richter	1989	3	8	1989	3	8	15.66429525	5500	46520.918	-0.61343366	-1.090843034	2.818313932
1965-0107-IRN	Earthquake	1965	107	5	Richter	1965	2	10	1965	2	10	20	24920.36344	63391.4517	-0.19107026	-1.090843034	2.818313932
2003-0236-AFG	Earthquake	2003	236	5	Richter	2003	4	10	2003	4	10	1	1001	19517.47294	-1.8784319	-1.090843034	2.818313932
1998-0207-TUR	Earthquake	1998	207	5	Richter	1998	7	4	1998	7	4	8.607405192	1016	30743.67506	-1.189276	-1.090843034	2.818313932
2003-0322-IRN	Earthquake	2003	322	5	Richter	2003	7	3	2003	7	3	8.827512019	1091	31285.42181	-1.1649922	-1.090843034	2.818313932
2003-0402-CHN	Earthquake	2003	402	5	Richter	2003	8	16	2003	8	16	4	455500	167000	0.10790664	-1.090843034	2.818313932
2003-0184-ITA	Earthquake	2003	184	5	Richter	2003	4	11	2003	4	11	7.522643979	232	561352	-0.98249084	-1.090843034	2.818313932
1964-0016-AZO	Earthquake	1964	16	5	Richter	1964	2	18	1964	2	18	8.559101681	1000	30624.21746	-1.1946882	-1.090843034	2.818313932
1998-0078-ITA	Earthquake	1998	78	5	Richter	1998	4	3	1998	4	3	8.261495975	905	29883.57269	-1.2287233	-1.090843034	2.818313932
1963-0001-LBY	Earthquake	1963	1	5	Richter	1963	2	21	1963	2	21	300	5375	5000	-0.20216322	-1.090843034	2.818313932
2010-0002-TJK	Earthquake	2010	2	5	Richter	2010	1	2	2010	1	2	11.67986448	7840	1500	-1.2582508	-1.090843034	2.818313932
1997-0534-ZAF	Earthquake	1997	534	5	Richter	1997	7	21	1997	7	21	15	46	20358.52277	-1.7180458	-1.090843034	2.818313932
2003-0546-CHN	Earthquake	2003	546	5	Richter	2003	11	13	2003	11	13	1	23369	33433.12519	-1.1600813	-1.090843034	2.818313932
2003-0596-CHN	Earthquake	2003	596	5	Richter	2003	11	26	2003	11	26	19.36521503	10004	53872.88097	-0.40945768	-1.090843034	2.818313932
2003-0411-PAN	Earthquake	2003	411	5	Richter	2003	8	13	2003	8	13	5.83878139	340	23504.67799	-1.5625215	-1.090843034	2.818313932
2003-0649-IRN	Earthquake	2003	649	5	Richter	2003	12	11	2003	12	11	7.636836637	725	28301.61136	-1.304336	-1.090843034	2.818313932
1978-0263-TUR	Earthquake	1978	263	5	Richter	1978	2	15	1978	2	15	12.08347545	2645	38874.98511	-0.86304414	-1.090843034	2.818313932
1998-0454-CHN	Earthquake	1998	454	5	Richter	1998	12	1	1998	12	1	37.76257409	107084	22600	0.083527856	-1.090843034	2.818313932
1998-0587-CHN	Earthquake	1998	587	5	Richter	1998	10	26	1998	10	26	13.38273595	3528	41720.86404	-0.7648266	-1.090843034	2.818313932
1968-0018-NIC	Earthquake	1968	18	5	Richter	1968	1	4	1968	1	4	7.749857935	2000	2000	-1.58863	-1.090843034	2.818313932
1977-0071-IRN	Earthquake	1977	71	5	Richter	1977	5	26	1977	5	26	3	9	10989.70022	-2.6027594	-1.090843034	2.818313932
1967-0135-DZA	Earthquake	1967	135	5	Richter	1967	7	13	1967	7	13	10	215	24333.10923	-1.4956123	-1.090843034	2.818313932
2002-0655-CHN	Earthquake	2002	655	5	Richter	2002	8	8	2002	8	8	6.062270169	378	24123.45731	-1.5263971	-1.090843034	2.818313932
1967-0131-FRA	Earthquake	1967	131	5	Richter	1967	8	13	1967	8	13	1	1100	19834.49822	-1.8569274	-1.090843034	2.818313932
1998-0385-IRN	Earthquake	1998	385	5	Richter	1998	11	13	1998	11	13	5	4355	35174.77937	-1.0304501	-1.090843034	2.818313932
2002-0692-PAK	Earthquake	2002	692	5	Richter	2002	11	2	2002	11	2	17	15065	56217.46524	-0.35760814	-1.090843034	2.818313932
1977-0140-IRN	Earthquake	1977	140	5	Richter	1977	12	10	1977	12	10	3	15	11991.89973	-2.4862819	-1.090843034	2.818313932
1998-0584-ALB	Earthquake	1998	584	5	Richter	1998	10	1	1998	10	1	11.13436414	2100	36736.12507	-0.94171584	-1.090843034	2.818313932
2002-0804-IRN	Earthquake	2002	804	5	Richter	2002	12	24	2002	12	24	22.36375521	15015	59514.48346	-0.271005	-1.090843034	2.818313932
1966-0142-TUR	Earthquake	1966	142	5	Richter	1966	7	12	1966	7	12	12	20	16850.19782	-1.9790514	-1.090843034	2.818313932
1998-0580-CHN	Earthquake	1998	580	5	Richter	1998	3	19	1998	3	19	10.94342145	2000	36299.1456	-0.9583512	-1.090843034	2.818313932
2003-0068-IRN	Earthquake	2003	68	5	Richter	2003	1	11	2003	1	11	19.41724505	10080	53972.97253	-0.4068772	-1.090843034	2.818313932
1998-0585-IRN	Earthquake	1998	585	5	Richter	1998	10	5	1998	10	5	6.694270786	500	25836.49623	-1.4310251	-1.090843034	2.818313932
2010-0018-IRN	Earthquake	2010	18	5	Richter	2010	1	16	2010	1	17	7.729178716	750	28537.91301	-1.292777	-1.090843034	2.818313932
1981-0123-ITA	Earthquake	1981	123	5	Richter	1981	6	7	1981	6	7	5.624704806	306	22905.07575	-1.5984453	-1.090843034	2.818313932
2010-0087-CHN	Earthquake	2010	87	5	Richter	2010	2	25	2010	2	25	34.26117312	50011	79943.32859	0.13923824	-1.090843034	2.818313932
2016-0298-PER	Earthquake	2016	298	5	Richter	2016	8	14	2016	8	14	4	11182	39432.75551	-0.8865207	-1.090843034	2.818313932
2016-0251-TJK	Earthquake	2016	251	5	Richter	2016	7	1	2016	7	1	4.419513442	155	19385.79784	-1.8303541	-1.090843034	2.818313932
1986-0170-GTM	Earthquake	1986	170	5	Richter	1986	2	3	1986	2	3	11.84434015	2500	38341.12032	-0.8822678	-1.090843034	2.818313932
1986-0150-PER	Earthquake	1986	150	5	Richter	1986	1	11	1986	1	11	1	100	13167.48441	-2.4036908	-1.090843034	2.818313932
1986-0141-BRA	Earthquake	1986	141	5	Richter	1986	11	30	1986	11	30	1	23000	5000	-1.5130497	-1.090843034	2.818313932
1986-0140-BGR	Earthquake	1986	140	5	Richter	1986	12	7	1986	12	7	3	3060	29749.55508	-1.2736545	-1.090843034	2.818313932
2015-0125-CHN	Earthquake	2015	125	5	Richter	2015	3	1	2015	3	1	9.90162669	2032	15000	-1.1459458	-1.090843034	2.818313932
1991-0173-PER	Earthquake	1991	173	5	Richter	1991	7	24	1991	7	24	11	1535	34732.21757	-1.0170459	-1.090843034	2.818313932
2015-0078-CHN	Earthquake	2015	78	5	Richter	2015	2	22	2015	2	22	15.81206944	8640	14650	-0.73476565	-1.090843034	2.818313932
1991-0230-GTM	Earthquake	1991	230	5	Richter	1991	9	18	1991	9	18	14	23890	58396.11199	-0.314325	-1.090843034	2.818313932
1991-0284-IRN	Earthquake	1991	284	5	Richter	1991	11	4	1991	11	4	9.884640826	1501	33831.76019	-1.0562128	-1.090843034	2.818313932
1923-0027-COL	Earthquake	1923	27	5	Richter	1923	12	14	1923	12	14	300	181088.297	157053.3597	1.1238658	-1.090843034	2.818313932
2014-0334-PER	Earthquake	2014	334	5	Richter	2014	9	27	2014	9	27	8	604	27701.15296	-1.3311714	-1.090843034	2.818313932
1924-0009-TUR	Earthquake	1924	9	5	Richter	1924	5	13	1924	5	13	50	48752.21859	86168.6683	0.2538491	-1.090843034	2.818313932
2016-0335-MKD	Earthquake	2016	335	5	Richter	2016	9	11	2016	9	11	3.541847097	100	10000	-2.1003454	-1.090843034	2.818313932
1991-0293-CRI	Earthquake	1991	293	5	Richter	1991	8	9	1991	8	9	4.368433752	150	19230.52002	-1.8415341	-1.090843034	2.818313932
2014-0288-ECU	Earthquake	2014	288	5	Richter	2014	8	13	2014	8	13	3	18	12371.31379	-2.4447093	-1.090843034	2.818313932
2010-0064-CHN	Earthquake	2010	64	5	Richter	2010	1	30	2010	1	30	1	10515	4400	-1.6904336	-1.090843034	2.818313932
2014-0258-COM	Earthquake	2014	258	5	Richter	2014	3	12	2014	3	12	19.36246961	10000	53867.59724	-0.40959394	-1.090843034	2.818313932
1991-0498-AFG	Earthquake	1991	498	5	Richter	1991	4	18	1991	4	18	25	33480.29466	93074.33076	0.00014601	-1.090843034	2.818313932
2014-0129-CHN	Earthquake	2014	129	5	Richter	2014	4	4	2014	4	4	39.09634172	75021	80000	0.25603452	-1.090843034	2.818313932
2014-0054-IRN	Earthquake	2014	54	5	Richter	2014	1	2	2014	1	2	1	330	2000	-2.5159955	-1.090843034	2.818313932
1985-0120-GTM	Earthquake	1985	120	5	Richter	1985	10	11	1985	10	11	15.14383294	5000	45446.05623	-0.64593095	-1.090843034	2.818313932
2013-0581-CHN	Earthquake	2013	581	5	Richter	2013	12	1	2013	12	1	10.94342145	2000	36299.1456	-0.9583512	-1.090843034	2.818313932
2013-0563-CHN	Earthquake	2013	563	5	Richter	2013	4	17	2013	4	17	36.61885306	80555	38000	0.114635795	-1.090843034	2.818313932
2013-0555-CHN	Earthquake	2013	555	5	Richter	2013	12	16	2013	12	16	30.70761309	90500	6300	-0.2426267	-1.090843034	2.818313932
2013-0470-CHN	Earthquake	2013	470	5	Richter	2013	11	22	2013	11	23	36.17555222	58300	83007.52359	0.191528	-1.090843034	2.818313932
2013-0436-IDN	Earthquake	2013	436	5	Richter	2013	10	22	2013	10	22	1	2738	23178.40037	-1.6489938	-1.090843034	2.818313932
1992-0012-DZA	Earthquake	1992	12	5	Richter	1992	1	19	1992	1	19	11.41007139	2250	37363.04002	-0.9181917	-1.090843034	2.818313932
1985-0027-IRN	Earthquake	1985	27	5	Richter	1985	2	3	1985	2	3	1	7080	27263.06872	-1.4323659	-1.090843034	2.818313932
2014-0311-ZAF	Earthquake	2014	311	5	Richter	2014	8	5	2014	8	5	1	2002	21971.18845	-1.7203819	-1.090843034	2.818313932
1992-0180-IRN	Earthquake	1992	180	5	Richter	1992	3	4	1992	3	4	5	4050	34741.13792	-1.047006	-1.090843034	2.818313932
2016-0341-KOR	Earthquake	2016	341	5	Richter	2016	9	12	2016	9	12	24.69962444	29832	21000	-0.30004147	-1.090843034	2.818313932
1990-0250-ITA	Earthquake	1990	250	5	Richter	1990	12	13	1990	12	13	19	2700	500000	-0.26202565	-1.090843034	2.818313932
2020-0106-HRV	Earthquake	2020	106	5	Richter	2020	3	22	2020	3	22	1	63017	39607.7987	-0.93388855	-1.090843034	2.818313932
1989-0067-VEN	Earthquake	1989	67	5	Richter	1989	5	4	1989	5	4	10.94342145	2000	36299.1456	-0.9583512	-1.090843034	2.818313932
1989-0071-BGD	Earthquake	1989	71	5	Richter	1989	6	12	1989	6	12	1	100	13167.48441	-2.4036908	-1.090843034	2.818313932
2019-0551-FRA	Earthquake	2019	551	5	Richter	2019	11	11	2019	11	11	7.743767963	754	28575.16682	-1.2909633	-1.090843034	2.818313932
2019-0520-CHN	Earthquake	2019	520	5	Richter	2019	9	8	2019	9	8	1	15582	31196.4427	-1.2524955	-1.090843034	2.818313932
1989-0136-CHN	Earthquake	1989	136	5	Richter	1989	10	18	1989	10	18	29	105140	87643.01029	0.25555596	-1.090843034	2.818313932
2019-0425-CHN	Earthquake	2019	425	5	Richter	2019	9	8	2019	9	8	1	15582	31196.4427	-1.2524955	-1.090843034	2.818313932
1989-0142-AUS	Earthquake	1989	142	5	Richter	1989	12	28	1989	12	28	12	2115	1000000	-0.31104127	-1.090843034	2.818313932
1988-0042-DZA	Earthquake	1988	42	5	Richter	1988	10	31	1988	10	31	5.287255726	257	21945.40993	-1.6579463	-1.090843034	2.818313932
2019-0232-ALB	Earthquake	2019	232	5	Richter	2019	6	1	2019	6	1	5.611643226	304	22868.26637	-1.6006812	-1.090843034	2.818313932
2019-0096-CHN	Earthquake	2019	96	5	Richter	2019	2	25	2019	2	25	2	32772	2000	-1.4181244	-1.090843034	2.818313932
2019-0085-IDN	Earthquake	2019	85	5	Richter	2019	2	28	2019	2	28	10.46484156	1763	35193.42134	-1.001357	-1.090843034	2.818313932
1989-0225-CHN	Earthquake	1989	225	5	Richter	1989	11	20	1989	11	20	4	52800	51407.59664	-0.53258955	-1.090843034	2.818313932
2018-0323-CHN	Earthquake	2018	323	5	Richter	2018	8	13	2018	8	13	23.24589787	18024	50000	-0.2563447	-1.090843034	2.818313932
1990-0601-SUN	Earthquake	1990	601	5	Richter	1990	12	1	1990	12	1	12.6352322	3000	40094.51971	-0.82010305	-1.090843034	2.818313932
1990-0105-ITA	Earthquake	1990	105	5	Richter	1990	5	6	1990	5	6	2	16	11135.64038	-2.600736	-1.090843034	2.818313932
2018-0215-CHN	Earthquake	2018	215	5	Richter	2018	5	28	2018	5	28	19.08565266	12000	29000	-0.49179775	-1.090843034	2.818313932
1987-0101-IRN	Earthquake	1987	101	5	Richter	1987	5	29	1987	5	29	2	50	13528.78181	-2.340924	-1.090843034	2.818313932
2017-0521-IRN	Earthquake	2017	521	5	Richter	2017	12	20	2017	12	20	2	120	15711.45753	-2.1413014	-1.090843034	2.818313932
1990-0217-GRC	Earthquake	1990	217	5	Richter	1990	6	16	1990	6	16	0.739316862	1	5627.004564	-3.5499709	-1.090843034	2.818313932
2017-0443-KOR	Earthquake	2017	443	5	Richter	2017	11	15	2017	11	15	15.20481592	5057	45572.58086	-0.6420659	-1.090843034	2.818313932
1986-0372-IND	Earthquake	1986	372	5	Richter	1986	4	26	1986	4	26	6	30	5000	-2.3170686	-1.090843034	2.818313932
2017-0124-CHN	Earthquake	2017	124	5	Richter	2017	5	11	2017	5	11	8	4583	2000	-1.4167466	-1.090843034	2.818313932
2017-0113-CHN	Earthquake	2017	113	5	Richter	2017	3	26	2017	3	26	10.92172636	2106	31000	-0.9778104	-1.090843034	2.818313932
2017-0015-ITA	Earthquake	2017	15	5	Richter	2017	1	18	2017	1	19	29	11	18000	-1.8374066	-1.090843034	2.818313932
2016-0536-CHN	Earthquake	2016	536	5	Richter	2016	5	18	2016	5	18	2	5000	60000	-1.1614752	-1.090843034	2.818313932
1914-0028-ITA	Earthquake	1914	28	5	Richter	1914	5	8	1914	5	8	120	669	49767.03596	-0.44515774	-1.090843034	2.818313932
1990-0230-ECU	Earthquake	1990	230	5	Richter	1990	8	11	1990	8	11	4	6510	35951.63731	-1.0098705	-1.090843034	2.818313932
2016-0493-USA	Earthquake	2016	493	5	Richter	2016	11	7	2016	11	7	4.08155653	120	20000	-1.8971868	-1.090843034	2.818313932
1986-0186-PAK	Earthquake	1986	186	5	Richter	1986	10	16	1986	10	16	7.729178716	750	28537.91301	-1.292777	-1.090843034	2.818313932
1987-0149-CHN	Earthquake	1987	149	5	Richter	1987	8	2	1987	8	2	54.48591576	185084	110195.9857	0.58541	-1.090843034	2.818313932
1984-0413-TUR	Earthquake	1984	413	5	Richter	1984	10	18	1984	10	18	3	375035	67650.04649	-0.17720534	-1.090843034	2.818313932
1985-0193-YUG	Earthquake	1985	193	5	Richter	1985	9	28	1985	9	28	9.919549695	1516	33914.37133	-1.0528224	-1.090843034	2.818313932
1999-0587-IRN	Earthquake	1999	587	5	Richter	1999	11	26	1999	11	26	5.235743542	250	21797.27656	-1.6673621	-1.090843034	2.818313932
1932-0016-IRN	Earthquake	1932	16	5	Richter	1932	5	20	1932	5	20	1070	459570.1401	240473.5662	1.7413262	-1.090843034	2.818313932
1983-0066-SUN	Earthquake	1983	66	5	Richter	1983	4	2	1983	4	2	21.81563687	14000	58501.54648	-0.29486957	-1.090843034	2.818313932
2012-0536-CHN	Earthquake	2012	536	5	Richter	2012	12	7	2012	12	7	17.07515124	5500	96000	-0.45591107	-1.090843034	2.818313932
1984-0072-IDN	Earthquake	1984	72	5	Richter	1984	8	27	1984	8	27	6.967108237	1858	1000	-1.7605302	-1.090843034	2.818313932
1993-0578-IRN	Earthquake	1993	578	5	Richter	1993	1	27	1993	1	27	8.568197004	1003	30646.72661	-1.1936667	-1.090843034	2.818313932
2012-0397-CHN	Earthquake	2012	397	5	Richter	2012	7	20	2012	7	20	1	2610	22989.58051	-1.6599107	-1.090843034	2.818313932
1984-0047-ITA	Earthquake	1984	47	5	Richter	1984	5	7	1984	5	7	3	5083	32444.03416	-1.1579382	-1.090843034	2.818313932
2011-0030-CHN	Earthquake	2011	30	5	Richter	2011	2	1	2011	2	1	37.49543532	64501	85091.06668	0.22599207	-1.090843034	2.818313932
2020-0158-PRI	Earthquake	2020	158	5	Richter	2020	5	2	2020	5	2	4.368433752	150	19230.52002	-1.8415341	-1.090843034	2.818313932
1983-0070-PER	Earthquake	1983	70	5	Richter	1983	4	14	1983	4	14	10	14999.90508	50254.96853	-0.52763873	-1.090843034	2.818313932
2012-0545-AZE	Earthquake	2012	545	5	Richter	2012	5	18	2012	5	18	17.01833467	6949	49267.10667	-0.5337	-1.090843034	2.818313932
1993-0582-CHN	Earthquake	1993	582	5	Richter	1993	11	30	1993	11	30	6.713208311	504	25887.03674	-1.4283082	-1.090843034	2.818313932
1993-0581-IND	Earthquake	1993	581	5	Richter	1993	11	12	1993	11	12	6.811073117	525	26147.52214	-1.4143896	-1.090843034	2.818313932
1983-0437-JPN	Earthquake	1983	437	5	Richter	1983	8	8	1983	8	8	1	28	10593.79561	-2.6939502	-1.090843034	2.818313932
1993-0580-NPL	Earthquake	1993	580	5	Richter	1993	10	20	1993	10	20	5.484700693	285	22509.13614	-1.6226863	-1.090843034	2.818313932
1983-0408-YUG	Earthquake	1983	408	5	Richter	1983	2	25	1983	2	25	12	17142.67601	53420.31814	-0.43910956	-1.090843034	2.818313932
1993-0136-GRC	Earthquake	1993	136	5	Richter	1993	3	27	1993	3	27	1	1516	20951.79709	-1.7837871	-1.090843034	2.818313932
1993-0579-GRC	Earthquake	1993	579	5	Richter	1993	7	14	1993	7	14	7.162314318	605	27073.08622	-1.3660309	-1.090843034	2.818313932
2011-0387-CHN	Earthquake	2011	387	5	Richter	2011	6	8	2011	6	8	5.294540137	258	21966.3217	-1.6566223	-1.090843034	2.818313932
1983-0174-USA	Earthquake	1983	174	5	Richter	1983	5	2	1983	5	2	9.874700163	1545	31000	-1.0669093	-1.090843034	2.818313932
1983-0144-CHN	Earthquake	1983	144	5	Richter	1983	11	7	1983	11	7	34	18700	67467.5442	-0.08750524	-1.090843034	2.818313932
1983-0146-BEL	Earthquake	1983	146	5	Richter	1983	11	8	1983	11	8	2	1030	50000	-1.5055884	-1.090843034	2.818313932
2011-0159-ESP	Earthquake	2011	159	5	Richter	2011	5	11	2011	5	11	10	15300	200000	-0.269443	-1.090843034	2.818313932
2012-0597-IRN	Earthquake	2012	597	5	Richter	2012	1	19	2012	1	19	5.145226128	238	21535.88262	-1.684134	-1.090843034	2.818313932
2010-0673-CHN	Earthquake	2010	673	5	Richter	2010	8	29	2010	8	29	15.1588529	5014	45477.23348	-0.64497757	-1.090843034	2.818313932
2011-0445-PHL	Earthquake	2011	445	5	Richter	2011	11	7	2011	11	7	2.409323576	28	12741.21742	-2.4138155	-1.090843034	2.818313932
2010-0591-IRN	Earthquake	2010	591	5	Richter	2010	11	6	2010	11	6	3.836493891	104	17578.42852	-1.9664097	-1.090843034	2.818313932
1930-0035-ALB	Earthquake	1930	35	5	Richter	1930	12	2	1930	12	2	25	29344.62259	68312.10867	-0.08271942	-1.090843034	2.818313932
2013-0081-CHN	Earthquake	2013	81	5	Richter	2013	3	3	2013	3	3	66.01596158	427740	56000	0.67917514	-1.090843034	2.818313932
1983-0059-COL	Earthquake	1983	59	5	Richter	1983	3	31	1983	3	31	250	36200	410900	0.9334541	-1.090843034	2.818313932
1983-0058-IRN	Earthquake	1983	58	5	Richter	1983	3	26	1983	3	26	30	7066	55651.11772	-0.34929264	-1.090843034	2.818313932
1992-0247-IDN	Earthquake	1992	247	5	Richter	1992	2	4	1992	2	4	17.48583709	7501	50199.45548	-0.50763726	-1.090843034	2.818313932
1989-0090-IRN	Earthquake	1989	90	6	Richter	1989	5	27	1989	5	27	100	217	39516.95321	-0.75996286	-0.642454039	3.715091922
1999-0054-AFG	Earthquake	1999	54	6	Richter	1999	2	11	1999	2	11	70	91960	103064.1423	0.50574034	-0.642454039	3.715091922
1999-0561-DZA	Earthquake	1999	561	6	Richter	1999	12	22	1999	12	22	22	15175	60929	-0.26918724	-0.642454039	3.715091922
1999-0016-COL	Earthquake	1999	16	6	Richter	1999	1	25	1999	1	25	1186	1205933	1857366	2.336154	-0.642454039	3.715091922
1990-0219-PAK	Earthquake	1990	219	6	Richter	1990	6	17	1990	6	17	1.395437871	6	8732.299554	-2.9390488	-0.642454039	3.715091922
1994-0196-DZA	Earthquake	1994	196	6	Richter	1994	8	18	1994	8	18	171	12789	88746.65499	0.34045166	-0.642454039	3.715091922
1990-0228-SUN	Earthquake	1990	228	6	Richter	1990	8	3	1990	8	3	9.900959184	1508	33870.38843	-1.0546265	-0.642454039	3.715091922
1994-0767-CHN	Earthquake	1994	767	6	Richter	1994	1	3	1994	1	3	5.484700693	285	22509.13614	-1.6226863	-0.642454039	3.715091922
1994-0070-IRN	Earthquake	1994	70	6	Richter	1994	6	20	1994	6	20	2	100	15229.60508	-2.182874	-0.642454039	3.715091922
1989-0081-CHN	Earthquake	1989	81	6	Richter	1989	4	15	1989	4	15	8	40107	164000	-0.1790176	-0.642454039	3.715091922
1994-0768-PHL	Earthquake	1994	768	6	Richter	1994	5	13	1994	5	13	4.987575977	218	21077.21152	-1.7140621	-0.642454039	3.715091922
1994-0051-UGA	Earthquake	1994	51	6	Richter	1994	2	6	1994	2	6	7	50000	70000	-0.3298106	-0.642454039	3.715091922
1994-0057-AFG	Earthquake	1994	57	6	Richter	1994	5	1	1994	5	1	160	100330	124431.2127	0.7889597	-0.642454039	3.715091922
1995-0030-COL	Earthquake	1995	30	6	Richter	1995	2	8	1995	2	8	40	15097	67302.22615	-0.084533535	-0.642454039	3.715091922
1995-0034-CYP	Earthquake	1995	34	6	Richter	1995	2	23	1995	2	23	2	1865	4340	-1.838895	-0.642454039	3.715091922
1994-0059-COL	Earthquake	1994	59	6	Richter	1994	6	6	1994	6	6	271	37416	2400	0.0156416	-0.642454039	3.715091922
1994-0652-IDN	Earthquake	1994	652	6	Richter	1994	11	20	1994	11	20	3.282717561	67	15781.38366	-2.1163301	-0.642454039	3.715091922
1989-0092-IDN	Earthquake	1989	92	6	Richter	1989	8	1	1989	8	1	120	17196	86663.40248	0.29513675	-0.642454039	3.715091922
1994-0041-IRN	Earthquake	1994	41	6	Richter	1994	3	1	1994	3	1	3	15041	39050.83888	-0.9105664	-0.642454039	3.715091922
1989-0218-IDN	Earthquake	1989	218	6	Richter	1989	7	14	1989	7	14	4.811644424	197	20560.04094	-1.7485988	-0.642454039	3.715091922
1989-0186-USA	Earthquake	1989	186	6	Richter	1989	6	26	1989	6	26	5	315	22456.93427	-1.6293412	-0.642454039	3.715091922
1989-0167-MWI	Earthquake	1989	167	6	Richter	1989	3	9	1989	3	9	9	50100	28000	-0.427772	-0.642454039	3.715091922
1994-0600-CHN	Earthquake	1994	600	6	Richter	1994	12	31	1994	12	31	16.02038282	5860	47249.97301	-0.5918161	-0.642454039	3.715091922
1994-0040-IRN	Earthquake	1994	40	6	Richter	1994	2	23	1994	2	23	9	1500	1400	-1.668984	-0.642454039	3.715091922
1999-0385-MEX	Earthquake	1999	385	6	Richter	1999	6	21	1999	6	21	16.62005455	6500	48466.56592	-0.5564746	-0.642454039	3.715091922
1989-0155-CHN	Earthquake	1989	155	6	Richter	1989	5	7	1989	5	7	1	26591	54000	-1.046421	-0.642454039	3.715091922
1989-0287-CHN	Earthquake	1989	287	6	Richter	1989	9	22	1989	9	22	25.35899033	21404	64921.06679	-0.15012413	-0.642454039	3.715091922
1999-0405-TWN	Earthquake	1999	405	6	Richter	1999	10	22	1999	10	22	1	254	800	-2.7361507	-0.642454039	3.715091922
1990-0093-CHN	Earthquake	1990	93	6	Richter	1990	10	20	1990	10	20	1	30016	34893.95284	-1.1030037	-0.642454039	3.715091922
1999-0314-TUR	Earthquake	1999	314	6	Richter	1999	9	13	1999	9	13	6	422	24528.35158	-1.5045788	-0.642454039	3.715091922
1994-0513-IDN	Earthquake	1994	513	6	Richter	1994	10	9	1994	10	9	1	2437	22721.7818	-1.6755487	-0.642454039	3.715091922
1990-0169-GRC	Earthquake	1990	169	6	Richter	1990	12	21	1990	12	21	1	60	12067.03849	-2.5201685	-0.642454039	3.715091922
1999-0302-GRC	Earthquake	1999	302	6	Richter	1999	9	7	1999	9	7	143	115139	4200000	1.4324967	-0.642454039	3.715091922
1999-0445-TUR	Earthquake	1999	445	6	Richter	1999	11	11	1999	11	11	3	200	18667.23311	-1.8956542	-0.642454039	3.715091922
1989-0139-DZA	Earthquake	1989	139	6	Richter	1989	10	29	1989	10	29	22	12184	57230.28544	-0.3238681	-0.642454039	3.715091922
1990-0170-CRI	Earthquake	1990	170	6	Richter	1990	12	22	1990	12	22	1	14299	19500	-1.3558997	-0.642454039	3.715091922
1990-0187-USA	Earthquake	1990	187	6	Richter	1990	2	28	1990	2	28	2.463064274	30	12700	-2.3946757	-0.642454039	3.715091922
1990-0189-PAK	Earthquake	1990	189	6	Richter	1990	3	4	1990	3	4	11	40	1000	-2.3871706	-0.642454039	3.715091922
1999-0455-CHN	Earthquake	1999	455	6	Richter	1999	11	1	1999	11	1	121.1531952	3020004	44000	1.1889142	-0.642454039	3.715091922
1996-0205-CHN	Earthquake	1996	205	6	Richter	1996	9	25	1996	9	25	4.230264717	137	18807.66404	-1.8724439	-0.642454039	3.715091922
1993-0490-COL	Earthquake	1993	490	6	Richter	1993	7	22	1993	7	22	2	3071	27339.17272	-1.4020059	-0.642454039	3.715091922
1997-0532-CHN	Earthquake	1997	532	6	Richter	1997	4	11	1997	4	11	9	100089	67983.42785	-0.1284216	-0.642454039	3.715091922
1992-0554-USA	Earthquake	1992	554	6	Richter	1992	4	22	1992	4	22	3.215736969	32	100000	-1.9274122	-0.642454039	3.715091922
1991-0399-ROU	Earthquake	1991	399	6	Richter	1991	12	2	1991	12	2	13.99814278	4005	43038.87149	-0.7215885	-0.642454039	3.715091922
1997-0281-BGD	Earthquake	1997	281	6	Richter	1997	11	22	1997	11	22	23	200	28625.8135	-1.2467616	-0.642454039	3.715091922
1997-0240-IDN	Earthquake	1997	240	6	Richter	1997	9	28	1997	9	28	20	3105	1100	-1.346854	-0.642454039	3.715091922
1995-0457-CHN	Earthquake	1995	457	6	Richter	1995	7	21	1995	7	21	14	5060	44794.23226	-0.6682303	-0.642454039	3.715091922
1997-0228-ITA	Earthquake	1997	228	6	Richter	1997	9	26	1997	10	3	14	38100	4524900	0.57834333	-0.642454039	3.715091922
1997-0116-MEX	Earthquake	1997	116	6	Richter	1997	5	22	1997	5	22	20.65537464	12000	56331.0441	-0.34742922	-0.642454039	3.715091922
1997-0115-IND	Earthquake	1997	115	6	Richter	1997	5	22	1997	5	22	43	156500	37000	0.28523245	-0.642454039	3.715091922
1992-0252-JPN	Earthquake	1992	252	6	Richter	1992	2	2	1992	2	2	2.526127228	32	13165.40493	-2.3682864	-0.642454039	3.715091922
1997-0035-IRN	Earthquake	1997	35	6	Richter	1997	2	28	1997	2	28	1100	38600	76000	1.0500947	-0.642454039	3.715091922
1997-0533-IRN	Earthquake	1997	533	6	Richter	1997	6	25	1997	6	25	26.98313913	25500	67769.87766	-0.09042163	-0.642454039	3.715091922
1991-0773-PAN	Earthquake	1991	773	6	Richter	1991	5	4	1991	5	4	11.01285653	2036	36458.32019	-0.9522685	-0.642454039	3.715091922
1996-0062-ECU	Earthquake	1996	62	6	Richter	1996	3	28	1996	3	28	27	30705	7000	-0.47171658	-0.642454039	3.715091922
1992-0236-UZB	Earthquake	1992	236	6	Richter	1992	5	15	1992	5	15	9	50000	60381.94456	-0.28667438	-0.642454039	3.715091922
1992-0202-AFG	Earthquake	1992	202	6	Richter	1992	5	20	1992	5	20	50	21291.48361	103248.1372	0.12430138	-0.642454039	3.715091922
1997-0030-PAK	Earthquake	1997	30	6	Richter	1997	2	28	1997	2	28	50	10100	65848.54066	-0.105100445	-0.642454039	3.715091922
1997-0017-IRN	Earthquake	1997	17	6	Richter	1997	2	4	1997	2	4	100	84500	30000	0.3617263	-0.642454039	3.715091922
1992-0058-PAK	Earthquake	1992	58	6	Richter	1992	8	28	1992	8	28	4	7667.406491	36970.92503	-0.97255796	-0.642454039	3.715091922
1992-0093-BEL	Earthquake	1992	93	6	Richter	1992	4	13	1992	4	13	35.11997254	38833.97295	161731.9773	0.22618069	-0.642454039	3.715091922
1992-0149-EGY	Earthquake	1992	149	6	Richter	1992	10	12	1992	10	12	552	92649	1200000	1.5372229	-0.642454039	3.715091922
1996-0081-CHN	Earthquake	1996	81	6	Richter	1996	5	3	1996	5	3	18	200300	88524.61957	0.2505846	-0.642454039	3.715091922
1997-0011-CHN	Earthquake	1997	11	6	Richter	1997	1	21	1997	1	21	12	155040	77821.25438	0.063011914	-0.642454039	3.715091922
1996-0212-HRV	Earthquake	1996	212	6	Richter	1996	9	5	1996	9	5	10.94342145	2000	36299.1456	-0.9583512	-0.642454039	3.715091922
1991-0774-ROU	Earthquake	1991	774	6	Richter	1991	7	18	1991	7	18	10.63487935	1845	35588.03155	-0.98585594	-0.642454039	3.715091922
1991-0368-IND	Earthquake	1991	368	6	Richter	1991	10	20	1991	10	20	1500	54383	60000	1.1607739	-0.642454039	3.715091922
1998-0026-AFG	Earthquake	1998	26	6	Richter	1998	2	4	1998	2	4	2323	32818	10000	0.8540422	-0.642454039	3.715091922
1998-0076-CHN	Earthquake	1998	76	6	Richter	1998	1	10	1998	1	10	49	598000	285500	0.96150327	-0.642454039	3.715091922
1993-0480-USA	Earthquake	1993	480	6	Richter	1993	9	21	1993	9	21	2	3000	7500	-1.6447421	-0.642454039	3.715091922
1990-0702-IDN	Earthquake	1990	702	6	Richter	1990	7	6	1990	7	6	3.823374651	103	17536.82227	-1.969704	-0.642454039	3.715091922
1993-0144-PER	Earthquake	1993	144	6	Richter	1993	4	18	1993	4	18	6	145	20436.42853	-1.748164	-0.642454039	3.715091922
1996-0179-GRC	Earthquake	1996	179	6	Richter	1996	8	6	1996	8	6	9.882305792	1500	33826.23118	-1.0564399	-0.642454039	3.715091922
1998-0582-CHN	Earthquake	1998	582	6	Richter	1998	8	27	1998	8	27	3	111862	55018.29431	-0.45305133	-0.642454039	3.715091922
1998-0581-CHN	Earthquake	1998	581	6	Richter	1998	5	28	1998	5	28	26.80499819	25028	67460.0458	-0.09679201	-0.642454039	3.715091922
1995-0089-IDN	Earthquake	1995	89	6	Richter	1995	5	19	1995	5	19	9.970347486	1538	34034.42343	-1.04791	-0.642454039	3.715091922
1998-0579-PAK	Earthquake	1998	579	6	Richter	1998	2	20	1998	2	20	1	611	17938.87828	-1.9909949	-0.642454039	3.715091922
1995-0233-TUR	Earthquake	1995	233	6	Richter	1995	10	1	1995	10	1	94	160240	205800	0.82474333	-0.642454039	3.715091922
1991-0088-CHN	Earthquake	1991	88	6	Richter	1991	3	26	1991	3	26	1	240542	49792.95074	-0.6284605	-0.642454039	3.715091922
1991-0122-GEO	Earthquake	1991	122	6	Richter	1991	6	15	1991	6	15	8	3740	37825.10383	-0.91543347	-0.642454039	3.715091922
1993-0108-CHN	Earthquake	1993	108	6	Richter	1993	1	27	1993	1	27	49.61839361	142146	103288.1011	0.49541134	-0.642454039	3.715091922
1998-0384-CHN	Earthquake	1998	384	6	Richter	1998	11	19	1998	11	19	3	337443	70000	-0.1916799	-0.642454039	3.715091922
1995-0261-CHN	Earthquake	1995	261	6	Richter	1995	10	24	1995	10	24	46	20297	80000	0.04458872	-0.642454039	3.715091922
1991-0192-USA	Earthquake	1991	192	6	Richter	1991	6	28	1991	6	28	2	100	33500	-2.0377347	-0.642454039	3.715091922
1998-0215-AZE	Earthquake	1998	215	6	Richter	1998	7	9	1998	7	9	1	700010	59762.10463	-0.3848917	-0.642454039	3.715091922
1993-0074-IND	Earthquake	1993	74	6	Richter	1993	9	29	1993	9	29	9748	30000	280000	1.8513763	-0.642454039	3.715091922
1991-0232-IRQ	Earthquake	1991	232	6	Richter	1991	7	27	1991	7	27	20	500	32509.03958	-1.0823548	-0.642454039	3.715091922
1998-0206-AZO	Earthquake	1998	206	6	Richter	1998	7	8	1998	7	8	10	1100	72000	-0.9750042	-0.642454039	3.715091922
1998-0201-TUR	Earthquake	1998	201	6	Richter	1998	6	28	1998	6	28	145	1589600	550000	1.5780877	-0.642454039	3.715091922
1998-0110-SVN	Earthquake	1998	110	6	Richter	1998	4	12	1998	4	12	7.542415217	700	28059.07628	-1.3163009	-0.642454039	3.715091922
1993-0056-SDN	Earthquake	1993	56	6	Richter	1993	8	1	1993	8	1	3	15	11991.89973	-2.4862819	-0.642454039	3.715091922
1995-0293-EGY	Earthquake	1995	293	6	Richter	1995	11	22	1995	11	22	10	69	20038.69962	-1.754762	-0.642454039	3.715091922
1998-0084-IRN	Earthquake	1998	84	6	Richter	1998	4	10	1998	4	10	12	2935	39514.59838	-0.84153056	-0.642454039	3.715091922
1995-0437-GRC	Earthquake	1995	437	6	Richter	1995	6	15	1995	6	15	26	13900	422700	0.11694864	-0.642454039	3.715091922
1990-0593-IDN	Earthquake	1990	593	6	Richter	1990	11	15	1990	11	15	1	2172	2100	-2.1366274	-0.642454039	3.715091922
1998-0583-IDN	Earthquake	1998	583	6	Richter	1998	9	28	1998	9	28	1	500	17334.82534	-2.0367098	-0.642454039	3.715091922
1900-0009-TUR	Earthquake	1900	9	6	Richter	1900	7	12	1900	7	12	140	103628.7533	121662.6252	0.75379664	-0.642454039	3.715091922
2000-0033-CHN	Earthquake	2000	33	6	Richter	2000	1	14	2000	1	14	7	1855007	73500	0.38947502	-0.642454039	3.715091922
2012-0398-IDN	Earthquake	2012	398	6	Richter	2012	8	18	2012	8	18	6	7883	40446.33498	-0.83706546	-0.642454039	3.715091922
2012-0502-IRN	Earthquake	2012	502	6	Richter	2012	12	5	2012	12	5	6	5523	38061.03221	-0.91819125	-0.642454039	3.715091922
2012-0604-CHN	Earthquake	2012	604	6	Richter	2012	3	9	2012	3	9	31.1464842	36641	84000	0.06052618	-0.642454039	3.715091922
2013-0020-IDN	Earthquake	2013	20	6	Richter	2013	1	22	2013	1	22	1	515	17422.58838	-2.02997	-0.642454039	3.715091922
2013-0098-IRN	Earthquake	2013	98	6	Richter	2013	4	9	2013	4	9	37	4350	600000	0.05185279	-0.642454039	3.715091922
2013-0127-JPN	Earthquake	2013	127	6	Richter	2013	4	12	2013	4	12	18.23099034	8438	51669.81655	-0.46750295	-0.642454039	3.715091922
2013-0140-IND	Earthquake	2013	140	6	Richter	2013	5	1	2013	5	1	3	59350	120000	-0.43405718	-0.642454039	3.715091922
2013-0151-AFG	Earthquake	2013	151	6	Richter	2013	4	24	2013	4	24	18	3531	44405.43497	-0.6702062	-0.642454039	3.715091922
2013-0206-TWN	Earthquake	2013	206	6	Richter	2013	6	2	2013	6	2	4	1519	1100	-1.9379119	-0.642454039	3.715091922
2012-0350-CHN	Earthquake	2012	350	6	Richter	2012	9	7	2012	9	7	81	744821	1000000	1.3761495	-0.642454039	3.715091922
2013-0235-IDN	Earthquake	2013	235	6	Richter	2013	7	2	2013	7	2	48	55935	130000	0.34515083	-0.642454039	3.715091922
2013-0314-CHN	Earthquake	2013	314	6	Richter	2013	8	31	2013	8	31	3	538050	155000	0.046386287	-0.642454039	3.715091922
2013-0405-GTM	Earthquake	2013	405	6	Richter	2013	9	7	2013	9	7	1	572	2000	-2.407877	-0.642454039	3.715091922
2013-0516-IRN	Earthquake	2013	516	6	Richter	2013	11	28	2013	11	28	8	1620	32787.0157	-1.106207	-0.642454039	3.715091922
2013-0561-TWN	Earthquake	2013	561	6	Richter	2013	3	27	2013	3	27	1	97	1000	-2.8842824	-0.642454039	3.715091922
2014-0049-GRC	Earthquake	2014	49	6	Richter	2014	1	26	2014	2	3	13.27305163	2023	178000	-0.609337	-0.642454039	3.715091922
2014-0159-THA	Earthquake	2014	159	6	Richter	2014	5	5	2014	5	5	1	17523	62000	-1.1029633	-0.642454039	3.715091922
2014-0173-CHN	Earthquake	2014	173	6	Richter	2014	5	24	2014	5	24	54.00792393	225015	60000	0.5094166	-0.642454039	3.715091922
2014-0177-CHN	Earthquake	2014	177	6	Richter	2014	5	30	2014	5	30	33.78610948	184723	2000	-0.28688875	-0.642454039	3.715091922
2014-0281-CHN	Earthquake	2014	281	6	Richter	2014	8	3	2014	8	3	731	1120513	5000000	2.368575	-0.642454039	3.715091922
2013-0242-CHN	Earthquake	2013	242	6	Richter	2013	7	22	2013	7	22	95	123887	1000000	1.0681887	-0.642454039	3.715091922
2012-0338-CHN	Earthquake	2012	338	6	Richter	2012	6	29	2012	6	29	48.56355754	155052	68000	0.42951575	-0.642454039	3.715091922
2012-0321-PHL	Earthquake	2012	321	6	Richter	2012	9	4	2012	9	4	13.99318387	4001	43028.32335	-0.7219291	-0.642454039	3.715091922
2012-0275-IRN	Earthquake	2012	275	6	Richter	2012	8	11	2012	8	11	306	61546	500000	1.1304888	-0.642454039	3.715091922
2010-0574-SRB	Earthquake	2010	574	6	Richter	2010	11	3	2010	11	3	2	27030	132260	-0.6842443	-0.642454039	3.715091922
2010-0668-TWN	Earthquake	2010	668	6	Richter	2010	3	4	2010	3	4	6.047114644	96	1000000	-1.1107439	-0.642454039	3.715091922
2010-0669-AFG	Earthquake	2010	669	6	Richter	2010	4	18	2010	4	18	11	1070	32655.52335	-1.0993313	-0.642454039	3.715091922
2010-0672-IRN	Earthquake	2010	672	6	Richter	2010	8	27	2010	8	27	3	3600	30587.15093	-1.2365972	-0.642454039	3.715091922
2011-0068-NZL	Earthquake	2011	68	6	Richter	2011	2	22	2011	2	22	181	301500	15000000	1.9220519	-0.642454039	3.715091922
2011-0079-CHN	Earthquake	2011	79	6	Richter	2011	3	10	2011	3	10	25	5440	290000	-0.14779913	-0.642454039	3.715091922
2011-0170-TUR	Earthquake	2011	170	6	Richter	2011	5	19	2011	5	19	3	10121	244000	-0.6510823	-0.642454039	3.715091922
2011-0243-UZB	Earthquake	2011	243	6	Richter	2011	7	19	2011	7	19	13	18177.63587	54872.22138	-0.40024364	-0.642454039	3.715091922
2011-0373-GTM	Earthquake	2011	373	6	Richter	2011	9	19	2011	9	19	3	400	21014.0567	-1.7376041	-0.642454039	3.715091922
2011-0388-NZL	Earthquake	2011	388	6	Richter	2011	6	13	2011	6	13	1	345	3000000	-1.1607795	-0.642454039	3.715091922
2011-0411-CHN	Earthquake	2011	411	6	Richter	2011	11	1	2011	11	1	46.26024351	143000	56400	0.36557218	-0.642454039	3.715091922
2011-0467-TUR	Earthquake	2011	467	6	Richter	2011	11	9	2011	11	9	40	105	28800.0626	-1.2173938	-0.642454039	3.715091922
2011-0601-CHN	Earthquake	2011	601	6	Richter	2011	8	11	2011	8	11	10.14676164	1616	34449.89375	-1.0310422	-0.642454039	3.715091922
2012-0020-PER	Earthquake	2012	20	6	Richter	2012	1	30	2012	1	30	14.51353003	4435	44128.97352	-0.6868158	-0.642454039	3.715091922
2012-0142-ITA	Earthquake	2012	142	6	Richter	2012	5	20	2012	5	20	7	11050	15800000	0.37123215	-0.642454039	3.715091922
2012-0151-TJK	Earthquake	2012	151	6	Richter	2012	5	13	2012	5	13	2	2531	26450.65058	-1.446102	-0.642454039	3.715091922
2012-0152-BGR	Earthquake	2012	152	6	Richter	2012	5	22	2012	5	22	4.92190081	210	20884.8202	-1.72681	-0.642454039	3.715091922
2012-0162-ITA	Earthquake	2012	162	6	Richter	2012	5	29	2012	5	29	17	14350	55752.38521	-0.36869532	-0.642454039	3.715091922
2012-0164-AFG	Earthquake	2012	164	6	Richter	2012	6	11	2012	6	11	73	237	37552.30405	-0.840118	-0.642454039	3.715091922
2012-0190-CHN	Earthquake	2012	190	6	Richter	2012	6	24	2012	6	24	4	34234	300000	-0.29297915	-0.642454039	3.715091922
2012-0191-AZE	Earthquake	2012	191	6	Richter	2012	5	7	2012	5	7	22.64307527	15550	60027.72652	-0.25906748	-0.642454039	3.715091922
2014-0287-IRN	Earthquake	2014	287	6	Richter	2014	8	18	2014	8	18	20.13655222	12250	43000	-0.40021673	-0.642454039	3.715091922
2014-0298-DZA	Earthquake	2014	298	6	Richter	2014	8	1	2014	8	1	6	420	24508.45162	-1.5056622	-0.642454039	3.715091922
2014-0318-USA	Earthquake	2014	318	6	Richter	2014	8	24	2014	8	24	1	3250	700000	-0.98785716	-0.642454039	3.715091922
2014-0449-CHN	Earthquake	2014	449	6	Richter	2014	10	7	2014	10	7	1	255324	274000	-0.30277368	-0.642454039	3.715091922
2018-0183-JPN	Earthquake	2018	183	6	Richter	2018	6	18	2018	6	18	5	20715	3250000	0.109418094	-0.642454039	3.715091922
2018-0254-IDN	Earthquake	2018	254	6	Richter	2018	7	29	2018	7	29	14	102852	29000	-0.15624917	-0.642454039	3.715091922
2018-0281-IRN	Earthquake	2018	281	6	Richter	2018	7	22	2018	7	22	12.68081897	5042	10000	-0.9727144	-0.642454039	3.715091922
2018-0310-IRN	Earthquake	2018	310	6	Richter	2018	8	26	2018	8	26	2	13255	35098.62045	-1.0685586	-0.642454039	3.715091922
2018-0321-SLV	Earthquake	2018	321	6	Richter	2018	5	6	2018	5	6	11.84266097	2499	38337.3599	-0.8824042	-0.642454039	3.715091922
2018-0360-HTI	Earthquake	2018	360	6	Richter	2018	10	6	2018	10	6	17	39336	66234.4194	-0.1387642	-0.642454039	3.715091922
2018-0426-IRN	Earthquake	2018	426	6	Richter	2018	11	25	2018	11	25	6.719910828	716	10000	-1.534138	-0.642454039	3.715091922
2019-0109-IDN	Earthquake	2019	109	6	Richter	2019	3	17	2019	3	17	9	1295	32346.30846	-1.1197414	-0.642454039	3.715091922
2019-0162-PHL	Earthquake	2019	162	6	Richter	2019	4	22	2019	4	22	25	15555	50000	-0.2649388	-0.642454039	3.715091922
2019-0259-CHN	Earthquake	2019	259	6	Richter	2019	6	17	2019	6	17	13	244220	1300000	0.6931486	-0.642454039	3.715091922
2019-0299-IRN	Earthquake	2019	299	6	Richter	2019	7	8	2019	7	8	1	2100	22151.31446	-1.7094847	-0.642454039	3.715091922
2019-0322-JPN	Earthquake	2019	322	6	Richter	2019	6	18	2019	6	18	6.499274787	460	25313.49652	-1.459455	-0.642454039	3.715091922
2019-0356-PHL	Earthquake	2019	356	6	Richter	2019	7	13	2019	7	13	19.06803694	9577	53299.59327	-0.42433047	-0.642454039	3.715091922
2019-0362-PHL	Earthquake	2019	362	6	Richter	2019	7	27	2019	7	27	9	3027	5258	-1.2873397	-0.642454039	3.715091922
2019-0444-ALB	Earthquake	2019	444	6	Richter	2019	9	21	2019	9	21	14.72957698	4608	45000	-0.6715592	-0.642454039	3.715091922
2019-0460-PAK	Earthquake	2019	460	6	Richter	2019	9	24	2019	9	24	39	130398	17000	0.07884764	-0.642454039	3.715091922
2019-0479-TUR	Earthquake	2019	479	6	Richter	2019	9	26	2019	9	26	1	1453	20800.41305	-1.7934654	-0.642454039	3.715091922
2019-0489-PHL	Earthquake	2019	489	6	Richter	2019	10	16	2019	10	16	7	3283	35969.76877	-0.9876901	-0.642454039	3.715091922
2019-0553-IRN	Earthquake	2019	553	6	Richter	2019	11	8	2019	11	8	6	23084	90000	-0.47861043	-0.642454039	3.715091922
2019-0572-ALB	Earthquake	2019	572	6	Richter	2019	11	26	2019	11	26	51	202913	700000	0.92537636	-0.642454039	3.715091922
2020-0007-PRI	Earthquake	2020	7	6	Richter	2020	1	7	2020	1	7	2	9008	32857.18031	-1.1566334	-0.642454039	3.715091922
2018-0059-TWN	Earthquake	2018	59	6	Richter	2018	2	6	2018	2	6	84	285	100000	-0.5842472	-0.642454039	3.715091922
2010-0363-IRN	Earthquake	2010	363	6	Richter	2010	7	20	2010	7	20	1	32	10838.25452	-2.6635027	-0.642454039	3.715091922
2018-0031-IDN	Earthquake	2018	31	6	Richter	2018	1	23	2018	1	23	1	13811	80000	-1.1028253	-0.642454039	3.715091922
2017-0451-KGZ	Earthquake	2017	451	6	Richter	2017	5	3	2017	5	3	15.14383294	5000	45446.05623	-0.64593095	-0.642454039	3.715091922
2014-0464-CHN	Earthquake	2014	464	6	Richter	2014	11	22	2014	11	22	5	82355	50000	-0.3878599	-0.642454039	3.715091922
2014-0465-JPN	Earthquake	2014	465	6	Richter	2014	11	22	2014	11	22	8.500171303	2657	2000	-1.5069277	-0.642454039	3.715091922
2014-0544-CHN	Earthquake	2014	544	6	Richter	2014	12	6	2014	12	6	1	2022	22008.53354	-1.7181152	-0.642454039	3.715091922
2015-0086-COL	Earthquake	2015	86	6	Richter	2015	3	10	2015	3	10	31.99604521	41236	76248.608	0.07345608	-0.642454039	3.715091922
2015-0216-MYS	Earthquake	2015	216	6	Richter	2015	6	5	2015	6	5	24	10	2	-3.5854843	-0.642454039	3.715091922
2015-0271-CHN	Earthquake	2015	271	6	Richter	2015	7	3	2015	7	3	3	9263	3200	-1.4664551	-0.642454039	3.715091922
2015-0336-COD	Earthquake	2015	336	6	Richter	2015	8	6	2015	8	7	3	390	20923.35728	-1.743377	-0.642454039	3.715091922
2015-0512-KGZ	Earthquake	2015	512	6	Richter	2015	11	17	2015	11	17	19.16284854	16780	12000	-0.58722574	-0.642454039	3.715091922
2015-0571-AFG	Earthquake	2015	571	6	Richter	2015	12	25	2015	12	25	9.223242283	492	40693.20031	-1.2608477	-0.642454039	3.715091922
2016-0019-IDN	Earthquake	2016	19	6	Richter	2016	1	16	2016	1	16	6.00491859	368	23965.34701	-1.5355387	-0.642454039	3.715091922
2016-0043-TWN	Earthquake	2016	43	6	Richter	2016	2	6	2016	2	6	117	525	700000	-0.013137234	-0.642454039	3.715091922
2016-0313-ITA	Earthquake	2016	313	6	Richter	2016	8	24	2016	8	24	296	4854	5000000	1.0458647	-0.642454039	3.715091922
2016-0329-TZA	Earthquake	2016	329	6	Richter	2016	9	10	2016	9	10	21	140191	481854.5889	0.5355583	-0.642454039	3.715091922
2016-0357-ITA	Earthquake	2016	357	6	Richter	2016	10	26	2016	10	26	1	3027	200000	-1.2324827	-0.642454039	3.715091922
2016-0458-IDN	Earthquake	2016	458	6	Richter	2016	8	1	2016	8	1	13.22229839	3410	41374.21064	-0.7764259	-0.642454039	3.715091922
2016-0464-PER	Earthquake	2016	464	6	Richter	2016	12	1	2016	12	1	1	257	15471.71671	-2.1884634	-0.642454039	3.715091922
2016-0492-JPN	Earthquake	2016	492	6	Richter	2016	10	21	2016	10	21	7.828539718	493	100000	-1.1408026	-0.642454039	3.715091922
2016-0526-CHN	Earthquake	2016	526	6	Richter	2016	12	8	2016	12	8	20.96257247	9120	135000	-0.2363182	-0.642454039	3.715091922
2017-0140-PHL	Earthquake	2017	140	6	Richter	2017	4	8	2017	4	8	17.62616201	25000	2000	-0.86214846	-0.642454039	3.715091922
2017-0182-GRC	Earthquake	2017	182	6	Richter	2017	6	12	2017	6	12	1	731	18496.95198	-1.9501075	-0.642454039	3.715091922
2017-0204-IRN	Earthquake	2017	204	6	Richter	2017	5	13	2017	5	13	3	2262	2000	-1.8300998	-0.642454039	3.715091922
2017-0513-CHN	Earthquake	2017	513	6	Richter	2017	11	18	2017	11	18	26.17456807	23403	66358.42907	-0.11968106	-0.642454039	3.715091922
1999-0638-ESP	Earthquake	1999	638	6	Richter	1999	2	2	1999	2	2	2.502840516	20	44004	-2.2410939	-0.642454039	3.715091922
2010-0361-IRN	Earthquake	2010	361	6	Richter	2010	7	30	2010	7	30	5.408694541	274	22292.88323	-1.636107	-0.642454039	3.715091922
2009-0573-MWI	Earthquake	2009	573	6	Richter	2009	12	20	2009	12	20	3	5721	33106.10867	-1.1309767	-0.642454039	3.715091922
2002-0835-CHN	Earthquake	2002	835	6	Richter	2002	12	14	2002	12	14	2	65500	46114.12306	-0.70425975	-0.642454039	3.715091922
2002-0882-ITA	Earthquake	2002	882	6	Richter	2002	9	6	2002	9	6	2	8100.672932	500000	-0.6762582	-0.642454039	3.715091922
2003-0050-TUR	Earthquake	2003	50	6	Richter	2003	1	27	2003	1	27	1	2	6749.001016	-3.295703	-0.642454039	3.715091922
2003-0069-IDN	Earthquake	2003	69	6	Richter	2003	1	23	2003	1	23	11.84769922	2502	38348.64225	-0.8819951	-0.642454039	3.715091922
2003-0105-CHN	Earthquake	2003	105	6	Richter	2003	2	24	2003	2	24	268	517000	157000	1.2984344	-0.642454039	3.715091922
2003-0183-CHN	Earthquake	2003	183	6	Richter	2003	4	17	2003	4	17	13.06947907	3300	41042.81027	-0.78760594	-0.642454039	3.715091922
2003-0197-TUR	Earthquake	2003	197	6	Richter	2003	5	1	2003	5	1	177	290520	135000	1.0412217	-0.642454039	3.715091922
2003-0255-DZA	Earthquake	2003	255	6	Richter	2003	5	27	2003	5	27	9	200	23508.62019	-1.5456675	-0.642454039	3.715091922
2003-0259-KAZ	Earthquake	2003	259	6	Richter	2003	5	23	2003	5	23	3	36626	45463.69953	-0.70763516	-0.642454039	3.715091922
2002-0821-IRN	Earthquake	2002	821	6	Richter	2002	9	25	2002	9	25	1.308091751	5	8350.422482	-3.0012136	-0.642454039	3.715091922
2003-0348-CHN	Earthquake	2003	348	6	Richter	2003	7	21	2003	7	21	16	1295584	75000	0.5540518	-0.642454039	3.715091922
2003-0400-GRC	Earthquake	2003	400	6	Richter	2003	8	14	2003	8	14	2.959175825	50	14688.28373	-2.2161193	-0.642454039	3.715091922
2003-0414-IDN	Earthquake	2003	414	6	Richter	2003	8	11	2003	8	11	6.694270786	500	25836.49623	-1.4310251	-0.642454039	3.715091922
2003-0438-IRN	Earthquake	2003	438	6	Richter	2003	7	10	2003	7	10	1	17525	21666	-1.2965183	-0.642454039	3.715091922
2003-0452-BGD	Earthquake	2003	452	6	Richter	2003	7	26	2003	7	26	2	2525	26439.92715	-1.4466432	-0.642454039	3.715091922
2003-0477-DOM	Earthquake	2003	477	6	Richter	2003	9	22	2003	9	22	3	2015	27700.07699	-1.3689193	-0.642454039	3.715091922
2003-0509-CHN	Earthquake	2003	509	6	Richter	2003	10	16	2003	10	16	3	60056	60000	-0.55935186	-0.642454039	3.715091922
2003-0519-CHN	Earthquake	2003	519	6	Richter	2003	10	25	2003	10	25	9	275043	40000	-0.027374819	-0.642454039	3.715091922
2003-0547-CHN	Earthquake	2003	547	6	Richter	2003	11	14	2003	11	14	4	493065	75299.95291	-0.023167439	-0.642454039	3.715091922
2003-0582-CHN	Earthquake	2003	582	6	Richter	2003	12	1	2003	12	1	11	6018	1933	-1.2803329	-0.642454039	3.715091922
2003-0354-JPN	Earthquake	2003	354	6	Richter	2003	7	25	2003	7	25	29.96115995	18191	411000	0.20435846	-0.642454039	3.715091922
2002-0820-IDN	Earthquake	2002	820	6	Richter	2002	9	20	2002	9	20	4.419513442	155	19385.79784	-1.8303541	-0.642454039	3.715091922
2002-0770-VUT	Earthquake	2002	770	6	Richter	2002	11	27	2002	11	27	6.708483257	503	25874.43062	-1.4289855	-0.642454039	3.715091922
2002-0757-GRC	Earthquake	2002	757	6	Richter	2002	12	2	2002	12	2	4.537909962	167	19743.60369	-1.804929	-0.642454039	3.715091922
2000-0291-TUR	Earthquake	2000	291	6	Richter	2000	6	6	2000	6	6	2	23080	38586.86468	-0.94210184	-0.642454039	3.715091922
2000-0298-CHN	Earthquake	2000	298	6	Richter	2000	6	6	2000	6	6	3.783516919	100	17410.14691	-1.9797823	-0.642454039	3.715091922
2000-0303-GRC	Earthquake	2000	303	6	Richter	2000	5	26	2000	5	26	7.141271984	600	27018.03711	-1.3688604	-0.642454039	3.715091922
2000-0428-JPN	Earthquake	2000	428	6	Richter	2000	7	1	2000	7	1	1	100	13167.48441	-2.4036908	-0.642454039	3.715091922
2001-0064-CHN	Earthquake	2001	64	6	Richter	2001	2	23	2001	2	23	3	300109	24000	-0.41181213	-0.642454039	3.715091922
2001-0151-CHN	Earthquake	2001	151	6	Richter	2001	4	12	2001	4	12	2	150190	31000	-0.6142603	-0.642454039	3.715091922
2001-0214-CHN	Earthquake	2001	214	6	Richter	2001	5	23	2001	5	23	2	10605	36000	-1.1077331	-0.642454039	3.715091922
2001-0345-PNG	Earthquake	2001	345	6	Richter	2001	6	5	2001	6	5	4.846056821	201	20661.65251	-1.741745	-0.642454039	3.715091922
2001-0358-TUR	Earthquake	2001	358	6	Richter	2001	6	25	2001	6	25	6.598084252	480	25579.10932	-1.4449438	-0.642454039	3.715091922
2001-0598-CHN	Earthquake	2001	598	6	Richter	2001	10	27	2001	10	27	1	17220	31733.75908	-1.229704	-0.642454039	3.715091922
2001-0751-PER	Earthquake	2001	751	6	Richter	2001	12	4	2001	12	4	2	155	16413.68781	-2.082944	-0.642454039	3.715091922
2001-0754-PER	Earthquake	2001	754	6	Richter	2001	8	9	2001	8	9	4	3965	33031.5486	-1.1229297	-0.642454039	3.715091922
2002-0122-AFG	Earthquake	2002	122	6	Richter	2002	3	3	2002	3	3	159.6942708	10223.79072	128647.0899	0.3456598	-0.642454039	3.715091922
2002-0175-AFG	Earthquake	2002	175	6	Richter	2002	3	25	2002	3	25	1000	91228	179856.9417	1.3510829	-0.642454039	3.715091922
2002-0208-AFG	Earthquake	2002	208	6	Richter	2002	4	12	2002	4	12	50	6150	60497.56501	-0.2182166	-0.642454039	3.715091922
2002-0234-SCG	Earthquake	2002	234	6	Richter	2002	4	24	2002	4	24	1	100	13167.48441	-2.4036908	-0.642454039	3.715091922
2002-0368-ARG	Earthquake	2002	368	6	Richter	2002	5	28	2002	5	28	7.644298126	727	28320.73775	-1.3033968	-0.642454039	3.715091922
2002-0512-IDN	Earthquake	2002	512	6	Richter	2002	8	15	2002	8	15	11.9244708	2548	38520.37731	-0.8757834	-0.642454039	3.715091922
2002-0654-TZA	Earthquake	2002	654	6	Richter	2002	5	18	2002	5	18	2	2000	25407.6917	-1.4997928	-0.642454039	3.715091922
2002-0690-ITA	Earthquake	2002	690	6	Richter	2002	10	31	2002	10	31	30	8533	796000	0.17762743	-0.642454039	3.715091922
2002-0721-PAK	Earthquake	2002	721	6	Richter	2002	11	20	2002	11	20	19	140782	84300.53483	0.18740869	-0.642454039	3.715091922
2003-0783-TUR	Earthquake	2003	783	6	Richter	2003	4	10	2003	4	10	4.566645559	170	19830.00954	-1.7988583	-0.642454039	3.715091922
2004-0001-IDN	Earthquake	2004	1	6	Richter	2004	1	1	2004	1	1	1	30040	12000	-1.2993728	-0.642454039	3.715091922
2004-0054-PAK	Earthquake	2004	54	6	Richter	2004	2	14	2004	2	14	24	13148	59048.32045	-0.27878606	-0.642454039	3.715091922
2004-0073-MAR	Earthquake	2004	73	6	Richter	2004	2	24	2004	2	24	628	13465	400000	0.9919442	-0.642454039	3.715091922
2007-0334-RUS	Earthquake	2007	334	6	Richter	2007	8	2	2007	8	2	2	7512	420000	-0.72318894	-0.642454039	3.715091922
2008-0001-KGZ	Earthquake	2008	1	6	Richter	2008	1	13	2008	1	13	12.6352322	3000	40094.51971	-0.82010305	-0.642454039	3.715091922
2008-0040-COD	Earthquake	2008	40	6	Richter	2008	2	3	2008	2	3	47	17998	45392.72843	-0.07735406	-0.642454039	3.715091922
2008-0099-USA	Earthquake	2008	99	6	Richter	2008	2	21	2008	2	21	11.1400009	2103	36748.98974	-0.94122905	-0.642454039	3.715091922
2008-0226-GRC	Earthquake	2008	226	6	Richter	2008	6	8	2008	6	8	2	3708	28233.8991	-1.3590268	-0.642454039	3.715091922
2008-0325-CHN	Earthquake	2008	325	6	Richter	2008	8	5	2008	8	5	4	13529	40737.46803	-0.84307635	-0.642454039	3.715091922
2008-0355-CHN	Earthquake	2008	355	6	Richter	2008	8	21	2008	8	21	6	160	20783.03803	-1.725718	-0.642454039	3.715091922
2008-0374-CHN	Earthquake	2008	374	6	Richter	2008	8	30	2008	8	30	40	1000589	492000	1.1060785	-0.642454039	3.715091922
2008-0401-IRN	Earthquake	2008	401	6	Richter	2008	9	10	2008	9	10	6	20545	47638.03868	-0.6186446	-0.642454039	3.715091922
2008-0455-CHN	Earthquake	2008	455	6	Richter	2008	10	6	2008	10	6	30	754	37970.36248	-0.8595188	-0.642454039	3.715091922
2008-0476-RUS	Earthquake	2008	476	6	Richter	2008	10	11	2008	10	11	13	5235	44359.77337	-0.6840864	-0.642454039	3.715091922
2008-0500-PAK	Earthquake	2008	500	6	Richter	2008	10	28	2008	10	28	166	75320	10000	0.27872002	-0.642454039	3.715091922
2008-0649-COL	Earthquake	2008	649	6	Richter	2008	5	24	2008	5	24	11	1754	10000	-1.2200699	-0.642454039	3.715091922
2008-0650-CHN	Earthquake	2008	650	6	Richter	2008	5	25	2008	5	25	8	351000	82179.61177	0.12015648	-0.642454039	3.715091922
2009-0002-CRI	Earthquake	2009	2	6	Richter	2009	1	8	2009	1	8	31	128618	200000	0.46574625	-0.642454039	3.715091922
2009-0136-ITA	Earthquake	2009	136	6	Richter	2009	4	6	2009	4	6	295	56000	2500000	1.3980016	-0.642454039	3.715091922
2009-0249-CHN	Earthquake	2009	249	6	Richter	2009	7	9	2009	7	9	1	65336	315000	-0.5450127	-0.642454039	3.715091922
2009-0366-ALB	Earthquake	2009	366	6	Richter	2009	9	7	2009	9	7	4.368433752	150	19230.52002	-1.8415341	-0.642454039	3.715091922
2009-0388-GEO	Earthquake	2009	388	6	Richter	2009	9	7	2009	9	7	17.32330492	7306	49876.19598	-0.5166184	-0.642454039	3.715091922
2009-0404-PHL	Earthquake	2009	404	6	Richter	2009	9	18	2009	9	19	3.152924473	392	90	-2.7316656	-0.642454039	3.715091922
2009-0547-MWI	Earthquake	2009	547	6	Richter	2009	12	8	2009	12	8	1	15015	30999.50888	-1.2609475	-0.642454039	3.715091922
2007-0217-CHN	Earthquake	2007	217	6	Richter	2007	6	2	2007	6	2	3	329	342000	-1.2624012	-0.642454039	3.715091922
2010-0093-TUR	Earthquake	2010	93	6	Richter	2010	3	8	2010	3	8	51	3600	55438.16101	-0.3340159	-0.642454039	3.715091922
2007-0087-IDN	Earthquake	2007	87	6	Richter	2007	3	6	2007	3	6	67	137660	200000	0.6948413	-0.642454039	3.715091922
2006-0694-KGZ	Earthquake	2006	694	6	Richter	2006	12	26	2006	12	26	20.68584581	12050	56388.51929	-0.34601152	-0.642454039	3.715091922
2004-0126-CHN	Earthquake	2004	126	6	Richter	2004	3	24	2004	3	24	52.41744596	190100	74000	0.5065184	-0.642454039	3.715091922
2004-0127-TUR	Earthquake	2004	127	6	Richter	2004	3	25	2004	3	25	9	4030	39269.74923	-0.86088264	-0.642454039	3.715091922
2004-0132-TUR	Earthquake	2004	132	6	Richter	2004	3	28	2004	3	28	29.41589858	32530	71940.21304	-0.007402601	-0.642454039	3.715091922
2004-0234-IRN	Earthquake	2004	234	6	Richter	2004	5	28	2004	5	28	35	498	165000	-0.6274092	-0.642454039	3.715091922
2004-0582-DMA	Earthquake	2004	582	6	Richter	2004	11	21	2004	11	21	4.783516919	253	31569.93334	-1.6221036	-0.642454039	3.715091922
2004-0599-CRI	Earthquake	2004	599	6	Richter	2004	11	20	2004	11	20	8	280	24291.58058	-1.5064682	-0.642454039	3.715091922
2004-0680-CHN	Earthquake	2004	680	6	Richter	2004	5	4	2004	5	4	14.23487579	4199	43541.09777	-0.70546	-0.642454039	3.715091922
2005-0031-IDN	Earthquake	2005	31	6	Richter	2005	1	23	2005	1	23	1	684	18288.13031	-1.9652605	-0.642454039	3.715091922
2005-0070-TUR	Earthquake	2005	70	6	Richter	2005	1	25	2005	1	25	2	422	19476.95953	-1.8545655	-0.642454039	3.715091922
2005-0092-IRN	Earthquake	2005	92	6	Richter	2005	2	22	2005	2	22	612	94766	80000	1.071953	-0.642454039	3.715091922
2005-0126-TUR	Earthquake	2005	126	6	Richter	2005	3	14	2005	3	14	11.44235028	2268	37436.13012	-0.9154749	-0.642454039	3.715091922
2005-0211-JPN	Earthquake	2005	211	6	Richter	2005	4	19	2005	4	19	8.229015847	895	29802.24653	-1.2325118	-0.642454039	3.715091922
2005-0328-PNG	Earthquake	2005	328	6	Richter	2005	6	4	2005	6	4	1	200	14822.88578	-2.2456408	-0.642454039	3.715091922
2005-0329-TUR	Earthquake	2005	329	6	Richter	2005	6	6	2005	6	6	5.922911003	354	23738.45232	-1.5487632	-0.642454039	3.715091922
2005-0654-IRN	Earthquake	2005	654	6	Richter	2005	11	27	2005	11	27	13	100	22558.91531	-1.586571	-0.642454039	3.715091922
2005-0738-IRN	Earthquake	2005	738	6	Richter	2005	3	13	2005	3	13	25.57075832	21912	65295.63591	-0.14212644	-0.642454039	3.715091922
2006-0123-IRN	Earthquake	2006	123	6	Richter	2006	2	28	2006	2	28	17.0676954	7006	49365.91712	-0.5309146	-0.642454039	3.715091922
2006-0153-IRN	Earthquake	2006	153	6	Richter	2006	3	31	2006	3	31	63	161418	42262	0.42270964	-0.642454039	3.715091922
2006-0279-IDN	Earthquake	2006	279	6	Richter	2006	5	26	2006	5	26	5778	3177923	3100000	3.0641847	-0.642454039	3.715091922
2006-0405-AFG	Earthquake	2006	405	6	Richter	2006	7	29	2006	7	29	4	16362	41291.35268	-0.8032181	-0.642454039	3.715091922
2006-0678-IDN	Earthquake	2006	678	6	Richter	2006	12	17	2006	12	17	8	1200	31148.33259	-1.1746364	-0.642454039	3.715091922
2006-0705-IDN	Earthquake	2006	705	6	Richter	2006	12	1	2006	12	1	1	114	13465.57231	-2.373814	-0.642454039	3.715091922
2003-0209-CHN	Earthquake	2003	209	6	Richter	2003	5	4	2003	5	4	1	8003	27839.86473	-1.4044241	-0.642454039	3.715091922
1993-0035-IRN	Earthquake	1993	35	6	Richter	1993	6	22	1993	6	22	24	4049	48285.58112	-0.5473459	-0.642454039	3.715091922
2020-0251-TUR	Earthquake	2020	251	6	Richter	2020	6	14	2020	6	14	1	6635	26962.37689	-1.4471678	-0.642454039	3.715091922
1980-0255-IND	Earthquake	1980	255	6	Richter	1980	11	20	1980	11	20	1.545273653	8	9370.687517	-2.8409603	-0.642454039	3.715091922
1980-0239-GRC	Earthquake	1980	239	6	Richter	1980	7	12	1980	7	12	1	17	9728.090241	-2.8077292	-0.642454039	3.715091922
1980-0129-HND	Earthquake	1980	129	6	Richter	1980	8	9	1980	8	9	2	4615.115729	29309.51355	-1.3091265	-0.642454039	3.715091922
1930-0008-ITA	Earthquake	1930	8	6	Richter	1930	7	23	1930	7	23	1883	10000	5000	0.43404686	-0.642454039	3.715091922
1969-0046-IRN	Earthquake	1969	46	6	Richter	1969	1	3	1969	1	3	50	48300	86031.58447	0.25172403	-0.642454039	3.715091922
1980-0111-DZA	Earthquake	1980	111	6	Richter	1980	12	7	1980	12	7	2	90	14957.91703	-2.2068982	-0.642454039	3.715091922
1980-0108-IRN	Earthquake	1980	108	6	Richter	1980	12	19	1980	12	19	20	24920.36344	63391.4517	-0.19107026	-0.642454039	3.715091922
1969-0061-ETH	Earthquake	1969	61	6	Richter	1969	3	29	1969	3	29	24	585	320	-1.851247	-0.642454039	3.715091922
1969-0082-CHN	Earthquake	1969	82	6	Richter	1969	7	26	1969	7	26	3000	53810	206968.9563	1.580698	-0.642454039	3.715091922
1969-0097-ZAF	Earthquake	1969	97	6	Richter	1969	9	29	1969	9	29	9	1000	24000	-1.2255036	-0.642454039	3.715091922
1980-0264-IRN	Earthquake	1980	264	6	Richter	1980	11	30	1980	11	30	26	30199.74411	69215.63942	-0.06367514	-0.642454039	3.715091922
1980-0092-JPN	Earthquake	1980	92	6	Richter	1980	9	25	1980	9	25	2	73	14432.3745	-2.2546337	-0.642454039	3.715091922
1930-0029-CHN	Earthquake	1930	29	6	Richter	1930	5	14	1930	5	14	42	42908.04018	81279.54679	0.16918908	-0.642454039	3.715091922
1980-0081-ECU	Earthquake	1980	81	6	Richter	1980	8	18	1980	8	18	8	40	17421.02191	-1.9501708	-0.642454039	3.715091922
1930-0031-CHN	Earthquake	1930	31	6	Richter	1930	8	24	1930	8	24	200	134563.1444	137104.8364	0.92698574	-0.642454039	3.715091922
1930-0032-TJK	Earthquake	1930	32	6	Richter	1930	9	22	1930	9	22	175	122026.5875	131106.491	0.8621475	-0.642454039	3.715091922
1930-0033-ITA	Earthquake	1930	33	6	Richter	1930	10	30	1930	10	30	18	23069.74929	61192.88465	-0.24222986	-0.642454039	3.715091922
1930-0034-ALB	Earthquake	1930	34	6	Richter	1930	11	21	1930	11	21	35	3048	49789.73588	-0.49190417	-0.642454039	3.715091922
1980-0051-MEX	Earthquake	1980	51	6	Richter	1980	6	9	1980	6	9	2	60	13956.82158	-2.2993515	-0.642454039	3.715091922
1980-0046-YUG	Earthquake	1980	46	6	Richter	1980	5	17	1980	5	17	15.25052702	5100	45667.31758	-0.6391789	-0.642454039	3.715091922
1930-0036-TWN	Earthquake	1930	36	6	Richter	1930	12	8	1930	12	8	4	891	25595.16205	-1.4633416	-0.642454039	3.715091922
1930-0037-TWN	Earthquake	1930	37	6	Richter	1930	12	22	1930	12	22	5.975864814	363	23885.0723	-1.540203	-0.642454039	3.715091922
1980-0084-IND	Earthquake	1980	84	6	Richter	1980	8	24	1980	8	24	13	40	19289.96793	-1.795502	-0.642454039	3.715091922
1980-0266-JPN	Earthquake	1980	266	6	Richter	1980	6	29	1980	6	29	1.473822934	7	9068.765271	-2.8864892	-0.642454039	3.715091922
1927-0014-IDN	Earthquake	1927	14	6	Richter	1927	12	1	1927	12	1	50	50	26587.93901	-1.3154817	-0.642454039	3.715091922
1927-0007-JOR	Earthquake	1927	7	6	Richter	1927	7	11	1927	7	11	268	166730.1234	151229.2087	1.0690962	-0.642454039	3.715091922
1967-0136-TUR	Earthquake	1967	136	6	Richter	1967	7	26	1967	7	26	97	79208.58556	107589.3595	0.5756273	-0.642454039	3.715091922
1920-0014-ITA	Earthquake	1920	14	6	Richter	1920	9	7	1920	9	7	1400	559566.9554	263135.398	1.8718529	-0.642454039	3.715091922
1982-0293-PER	Earthquake	1982	293	6	Richter	1982	3	28	1982	3	28	3	6210.790717	33573.99998	-1.1122466	-0.642454039	3.715091922
1920-0018-ALB	Earthquake	1920	18	6	Richter	1920	11	26	1920	11	26	200	134563.1444	137104.8364	0.92698574	-0.642454039	3.715091922
1920-0019-ARG	Earthquake	1920	19	6	Richter	1920	12	17	1920	12	17	400	223558.907	172943.587	1.2635543	-0.642454039	3.715091922
1982-0161-ALB	Earthquake	1982	161	6	Richter	1982	11	16	1982	11	16	1	5005	25694.5051	-1.511451	-0.642454039	3.715091922
1968-0023-ITA	Earthquake	1968	23	6	Richter	1968	1	15	1968	1	15	224	55563	250000	0.8954478	-0.642454039	3.715091922
1982-0131-YMN	Earthquake	1982	131	6	Richter	1982	12	13	1982	12	13	1507	401500	2000000	2.2006485	-0.642454039	3.715091922
1982-0128-IDN	Earthquake	1982	128	6	Richter	1982	12	25	1982	12	25	13	8817	1450	-1.2114326	-0.642454039	3.715091922
1950-0005-PER	Earthquake	1950	5	6	Richter	1950	5	21	1950	5	21	83	200	37475.29024	-0.83792394	-0.642454039	3.715091922
1923-0020-IRN	Earthquake	1923	20	6	Richter	1923	5	26	1923	5	26	2200	779135.0036	306155.6763	2.0913215	-0.642454039	3.715091922
1923-0025-IRN	Earthquake	1923	25	6	Richter	1923	9	17	1923	9	17	157	112701.9996	126424.6569	0.8094443	-0.642454039	3.715091922
1982-0068-CHN	Earthquake	1982	68	6	Richter	1982	6	16	1982	6	16	10	5	12797.49755	-2.353234	-0.642454039	3.715091922
1981-0122-GRC	Earthquake	1981	122	6	Richter	1981	3	10	1981	3	10	2	450	19691.90705	-1.8399171	-0.642454039	3.715091922
1981-0081-PAK	Earthquake	1981	81	6	Richter	1981	9	12	1981	9	12	250	2000	70000.99012	0.03837069	-0.642454039	3.715091922
1925-0005-USA	Earthquake	1925	5	6	Richter	1925	6	29	1925	6	29	13	12407.34905	8000	-0.8298382	-0.642454039	3.715091922
1925-0009-TUR	Earthquake	1925	9	6	Richter	1925	1	9	1925	1	9	200	134563.1444	137104.8364	0.92698574	-0.642454039	3.715091922
1981-0073-YUG	Earthquake	1981	73	6	Richter	1981	8	13	1981	8	13	2.828056263	44	14234.90954	-2.2597058	-0.642454039	3.715091922
1968-0073-MEX	Earthquake	1968	73	6	Richter	1968	9	25	1968	9	25	15	500	30604.1022	-1.1740023	-0.642454039	3.715091922
1925-0012-USA	Earthquake	1925	12	6	Richter	1925	6	29	1925	6	29	13	12407.34905	8000	-0.8298382	-0.642454039	3.715091922
1925-0013-TUR	Earthquake	1925	13	6	Richter	1925	8	7	1925	8	7	3	6129	33498.04633	-1.1152691	-0.642454039	3.715091922
1925-0014-CHN	Earthquake	1925	14	6	Richter	1925	10	15	1925	10	15	12	1500	35233.26599	-0.99458593	-0.642454039	3.715091922
1925-0015-IRN	Earthquake	1925	15	6	Richter	1925	12	14	1925	12	14	500	263248.6355	186368.0469	1.3719051	-0.642454039	3.715091922
1979-0216-ITA	Earthquake	1979	216	6	Richter	1979	9	19	1979	9	19	5	5000	36014.63926	-0.99895775	-0.642454039	3.715091922
1979-0115-IDN	Earthquake	1979	115	6	Richter	1979	12	18	1979	12	18	32	619	37212.5731	-0.88394386	-0.642454039	3.715091922
1931-0001-NIC	Earthquake	1931	1	6	Richter	1931	3	31	1931	3	31	1000	253394.9882	15000	1.094525	-0.642454039	3.715091922
1969-0107-YUG	Earthquake	1969	107	6	Richter	1969	10	26	1969	10	26	15	286116	50000	0.16446102	-0.642454039	3.715091922
1939-0005-GHA	Earthquake	1939	5	6	Richter	1939	6	22	1939	6	22	22	7630	52832.20218	-0.4305888	-0.642454039	3.715091922
1976-0047-IDN	Earthquake	1976	47	6	Richter	1976	7	14	1976	7	14	573	454755	195000	1.5258417	-0.642454039	3.715091922
1939-0008-TUR	Earthquake	1939	8	6	Richter	1939	11	21	1939	11	21	13	18177.63587	54872.22138	-0.40024364	-0.642454039	3.715091922
1939-0023-TUR	Earthquake	1939	23	6	Richter	1939	9	22	1939	9	22	60	68	29115.17316	-1.1872872	-0.642454039	3.715091922
1970-0134-TUR	Earthquake	1970	134	6	Richter	1970	4	23	1970	4	23	7.883467468	793	28930.80378	-1.2737682	-0.642454039	3.715091922
1974-0063-PAK	Earthquake	1974	63	6	Richter	1974	12	28	1974	12	28	4700	50200	3255	0.9282031	-0.642454039	3.715091922
1940-0032-CHN	Earthquake	1940	32	6	Richter	1940	4	6	1940	4	6	181	58255	116368.3109	0.70428836	-0.642454039	3.715091922
1940-0033-TUR	Earthquake	1940	33	6	Richter	1940	5	8	1940	5	8	16	21163.14513	58825.23911	-0.2994211	-0.642454039	3.715091922
1940-0034-CHN	Earthquake	1940	34	6	Richter	1940	8	5	1940	8	5	16.10718645	5950	47426.93495	-0.58661926	-0.642454039	3.715091922
1971-0030-TUR	Earthquake	1971	30	6	Richter	1971	5	12	1971	5	12	57	53662.37465	90035.49599	0.3174718	-0.642454039	3.715091922
1942-0043-TUR	Earthquake	1942	43	6	Richter	1942	11	15	1942	11	15	16	21163.14513	58825.23911	-0.2994211	-0.642454039	3.715091922
1973-0148-USA	Earthquake	1973	148	6	Richter	1973	2	21	1973	2	21	10.86991493	7291.428591	1000	-1.3672794	-0.642454039	3.715091922
1941-0029-YMN	Earthquake	1941	29	6	Richter	1941	1	11	1941	1	11	1200	8700	125077.6321	0.8733138	-0.642454039	3.715091922
1941-0030-IRN	Earthquake	1941	30	6	Richter	1941	2	16	1941	2	16	730	347322.9722	211559.8667	1.5556607	-0.642454039	3.715091922
1942-0042-ALB	Earthquake	1942	42	6	Richter	1942	8	27	1942	8	27	43	110	29473.90808	-1.183747	-0.642454039	3.715091922
1941-0031-CHN	Earthquake	1941	31	6	Richter	1931	5	6	1931	5	6	132	31808	98210.67026	0.46574026	-0.642454039	3.715091922
1941-0032-TUR	Earthquake	1941	32	6	Richter	1941	9	11	1941	9	11	430	235719.0272	177185.0139	1.2986706	-0.642454039	3.715091922
1941-0033-CHN	Earthquake	1941	33	6	Richter	1941	10	8	1941	10	8	15	360	28933.79436	-1.2489071	-0.642454039	3.715091922
1972-0024-PER	Earthquake	1972	24	6	Richter	1972	3	20	1972	3	20	12	1575000	20000	0.26855347	-0.642454039	3.715091922
1972-0151-AFG	Earthquake	1972	151	6	Richter	1972	6	24	1972	6	24	11	15	15751.71693	-2.0723674	-0.642454039	3.715091922
1972-0132-PAK	Earthquake	1972	132	6	Richter	1972	9	3	1972	9	3	100	5000	67540.41754	-0.04460264	-0.642454039	3.715091922
1972-0067-NIC	Earthquake	1972	67	6	Richter	1972	12	23	1972	12	23	10000	720000	845000	2.6865716	-0.642454039	3.715091922
1941-0034-TUR	Earthquake	1941	34	6	Richter	1941	11	12	1941	11	12	15	20186.11618	57566.98199	-0.33075872	-0.642454039	3.715091922
1943-0054-TUR	Earthquake	1943	54	6	Richter	1943	6	20	1943	6	20	285	174411.7666	154377.5508	1.0989594	-0.642454039	3.715091922
1967-0132-CHN	Earthquake	1967	132	6	Richter	1967	1	24	1967	1	24	11.1061029	2085	36671.59465	-0.9441598	-0.642454039	3.715091922
1944-0046-TUR	Earthquake	1944	46	6	Richter	1944	6	25	1944	6	25	21	25826.93191	64436.14961	-0.16737942	-0.642454039	3.715091922
1977-0051-IRN	Earthquake	1977	51	6	Richter	1977	3	21	1977	3	21	167	20682	95864.88353	0.44251442	-0.642454039	3.715091922
1931-0018-ALB	Earthquake	1931	18	6	Richter	1931	1	28	1931	1	28	90	74980.57182	104923.1456	0.539258	-0.642454039	3.715091922
1931-0019-ARM	Earthquake	1931	19	6	Richter	1931	4	27	1931	4	27	2890	951438.1669	335454.8742	2.2237833	-0.642454039	3.715091922
1979-0102-IDN	Earthquake	1979	102	6	Richter	1979	11	2	1979	11	2	26	43200	16000	-0.26296738	-0.642454039	3.715091922
1946-0028-TUR	Earthquake	1946	28	6	Richter	1946	2	21	1946	2	21	12	17142.67601	53420.31814	-0.43910956	-0.642454039	3.715091922
1979-0082-CHN	Earthquake	1979	82	6	Richter	1979	8	27	1979	8	27	11.14187897	2104	36753.27557	-0.9410668	-0.642454039	3.715091922
1979-0063-CHN	Earthquake	1979	63	6	Richter	1979	7	9	1979	7	9	41	2000	47896.17377	-0.5375713	-0.642454039	3.715091922
1979-0054-IDN	Earthquake	1979	54	6	Richter	1979	5	30	1979	5	30	34	36048	4150	-0.4719092	-0.642454039	3.715091922
1979-0052-YUG	Earthquake	1979	52	6	Richter	1979	5	24	1979	5	24	3.49573019	80	16482.91503	-2.055866	-0.642454039	3.715091922
1933-0007-USA	Earthquake	1933	7	6	Richter	1933	3	10	1933	3	10	116	72775.94465	38500	0.41984275	-0.642454039	3.715091922
1935-0003-TWN	Earthquake	1935	3	6	Richter	1935	4	21	1935	4	21	3276	101588	235005.6287	1.7536336	-0.642454039	3.715091922
1935-0029-IRN	Earthquake	1935	29	6	Richter	1935	3	5	1935	3	5	60	55716.58511	91596.07118	0.34237796	-0.642454039	3.715091922
1935-0030-IRN	Earthquake	1935	30	6	Richter	1935	4	12	1935	4	12	690	333280.3106	207603.2044	1.5282978	-0.642454039	3.715091922
1978-0141-IRN	Earthquake	1978	141	6	Richter	1978	12	14	1978	12	14	45	52	26181.24532	-1.3401035	-0.642454039	3.715091922
1935-0031-TUR	Earthquake	1935	31	6	Richter	1935	5	1	1935	5	1	540	278512.5366	191235.7803	1.4092747	-0.642454039	3.715091922
1935-0032-CHN	Earthquake	1935	32	6	Richter	1935	12	18	1935	12	18	100	80995.37765	108692.8731	0.59041727	-0.642454039	3.715091922
1978-0113-DFR	Earthquake	1978	113	6	Richter	1978	9	3	1978	9	3	6.455903273	235	150000	-1.2657523	-0.642454039	3.715091922
1946-0012-TUR	Earthquake	1946	12	6	Richter	1946	5	31	1946	5	31	840	384925.1748	221745.6211	1.6238135	-0.642454039	3.715091922
1945-0020-CHN	Earthquake	1945	20	6	Richter	1945	9	23	1945	9	23	17	30	19428.55514	-1.7756374	-0.642454039	3.715091922
1977-0142-IRN	Earthquake	1977	142	6	Richter	1977	12	20	1977	12	20	589	500	66124.65743	-0.004724832	-0.642454039	3.715091922
1945-0017-TUR	Earthquake	1945	17	6	Richter	1945	3	20	1945	3	20	300	181088.297	157053.3597	1.1238658	-0.642454039	3.715091922
1936-0029-IRN	Earthquake	1936	29	6	Richter	1936	6	30	1936	6	30	12	17142.67601	53420.31814	-0.43910956	-0.642454039	3.715091922
1936-0030-CHN	Earthquake	1936	30	6	Richter	1936	8	1	1936	8	1	115	22326	89810.53339	0.34110823	-0.642454039	3.715091922
1977-0057-IRN	Earthquake	1977	57	6	Richter	1977	4	7	1977	4	7	352	400200	185975.6124	1.3556026	-0.642454039	3.715091922
1936-0032-CHN	Earthquake	1936	32	6	Richter	1936	8	17	1936	8	17	30	33536.56935	72614.80173	0.005809797	-0.642454039	3.715091922
1967-0102-IDN	Earthquake	1967	102	6	Richter	1967	2	20	1967	2	20	54	8411	64861.0447	-0.12230918	-0.642454039	3.715091922
1982-0081-SLV	Earthquake	1982	81	6	Richter	1982	6	19	1982	6	19	20	32500	66333.70669	-0.13051903	-0.642454039	3.715091922
1983-0161-GIN	Earthquake	1983	161	6	Richter	1983	12	22	1983	12	22	275	21436	107098.6325	0.6095756	-0.642454039	3.715091922
1955-0020-EGY	Earthquake	1955	20	6	Richter	1955	9	12	1955	9	12	20	28	19867.18147	-1.7395949	-0.642454039	3.715091922
1962-0044-ALB	Earthquake	1962	44	6	Richter	1962	3	18	1962	3	18	15	154	25026.50749	-1.4425288	-0.642454039	3.715091922
1955-0002-PHL	Earthquake	1955	2	6	Richter	1955	4	1	1955	4	1	400	2000	5000	-0.31595752	-0.642454039	3.715091922
1962-0045-ITA	Earthquake	1962	45	6	Richter	1962	8	21	1962	8	21	16	30000	62438.718	-0.21985744	-0.642454039	3.715091922
1986-0189-IRN	Earthquake	1986	189	6	Richter	1986	12	20	1986	12	20	6.185082552	400	24460.49274	-1.5071087	-0.642454039	3.715091922
1986-0183-TUR	Earthquake	1986	183	6	Richter	1986	10	11	1986	10	11	8.568197004	1003	30646.72661	-1.1936667	-0.642454039	3.715091922
1986-0182-VEN	Earthquake	1986	182	6	Richter	1986	7	18	1986	7	18	1	150	14111.96225	-2.3112376	-0.642454039	3.715091922
1986-0177-USA	Earthquake	1986	177	6	Richter	1986	7	13	1986	7	13	3.129429862	179	720	-2.5049825	-0.642454039	3.715091922
1986-0174-IRN	Earthquake	1986	174	6	Richter	1986	7	12	1986	7	12	1	1504	20923.36941	-1.7855992	-0.642454039	3.715091922
1986-0173-CHN	Earthquake	1986	173	6	Richter	1986	6	20	1986	6	20	5.518624126	290	22605.35669	-1.6167566	-0.642454039	3.715091922
1986-0171-SUN	Earthquake	1986	171	6	Richter	1986	5	13	1986	5	13	2	4500	29183.30078	-1.314886	-0.642454039	3.715091922
1963-0016-YUG	Earthquake	1963	16	6	Richter	1963	7	26	1963	7	26	1070	3300	1000000	1.0334123	-0.642454039	3.715091922
1909-0009-FRA	Earthquake	1909	9	6	Richter	1909	6	11	1909	6	11	46	45864.1779	83794.8841	0.21336173	-0.642454039	3.715091922
1953-0054-CYP	Earthquake	1953	54	6	Richter	1953	9	10	1953	9	10	40	2600	49832.96594	-0.4856138	-0.642454039	3.715091922
1967-0101-IDN	Earthquake	1967	101	6	Richter	1967	4	11	1967	4	11	71	100	32216.60462	-1.0457222	-0.642454039	3.715091922
1986-0113-GRC	Earthquake	1986	113	6	Richter	1986	9	13	1986	9	13	20	45300	745000	0.38007095	-0.642454039	3.715091922
1965-0015-GRC	Earthquake	1965	15	6	Richter	1965	3	9	1965	3	9	38	30253	8000	-0.354382	-0.642454039	3.715091922
1986-0106-SUN	Earthquake	1986	106	6	Richter	1986	8	31	1986	8	31	1	225558	730000	-0.14672078	-0.642454039	3.715091922
1986-0074-VEN	Earthquake	1986	74	6	Richter	1986	6	2	1986	6	2	2	850	1000	-2.2636085	-0.642454039	3.715091922
1986-0058-TUR	Earthquake	1986	58	6	Richter	1986	5	5	1986	5	5	15	20100	57524.94973	-0.33173358	-0.642454039	3.715091922
1986-0051-PER	Earthquake	1986	51	6	Richter	1986	4	5	1986	4	5	15	8080	22000	-0.68783414	-0.642454039	3.715091922
1985-0386-DZA	Earthquake	1985	386	6	Richter	1985	10	27	1985	10	27	30	14335.60644	1000	-0.9502136	-0.642454039	3.715091922
1910-0005-DZA	Earthquake	1910	5	6	Richter	1910	6	24	1910	6	24	12	17142.67601	53420.31814	-0.43910956	-0.642454039	3.715091922
1965-0025-SLV	Earthquake	1965	25	6	Richter	1965	5	3	1965	5	3	125	139720	35000	0.5514207	-0.642454039	3.715091922
1985-0191-PER	Earthquake	1985	191	6	Richter	1985	8	21	1985	8	21	6.185082552	400	24460.49274	-1.5071087	-0.642454039	3.715091922
1987-0086-IDN	Earthquake	1987	86	6	Richter	1987	4	26	1987	4	26	2	15001	35848.53608	-1.0403433	-0.642454039	3.715091922
1985-0122-SUN	Earthquake	1985	122	6	Richter	1985	10	14	1985	10	14	29	8080	56537.05943	-0.32951587	-0.642454039	3.715091922
1987-0102-CHN	Earthquake	1987	102	6	Richter	1987	1	24	1987	1	24	11.1061029	2085	36671.59465	-0.9441598	-0.642454039	3.715091922
1987-0162-ECU	Earthquake	1987	162	6	Richter	1987	9	22	1987	9	22	2	6	9417.592454	-2.8243828	-0.642454039	3.715091922
1902-0011-SUN	Earthquake	1902	11	6	Richter	1902	12	16	1902	12	16	4562	125112	261046.7554	1.9066172	-0.642454039	3.715091922
1957-0015-TUN	Earthquake	1957	15	6	Richter	1957	2	20	1957	2	20	13	18177.63587	54872.22138	-0.40024364	-0.642454039	3.715091922
1988-0467-GRC	Earthquake	1988	467	6	Richter	1988	10	16	1988	10	16	2.314439338	25	12391.94937	-2.4524565	-0.642454039	3.715091922
1988-0463-GTM	Earthquake	1988	463	6	Richter	1988	10	15	1988	10	15	9.997858676	1550	34099.36282	-1.04526	-0.642454039	3.715091922
1959-0044-MEX	Earthquake	1959	44	6	Richter	1959	8	26	1959	8	26	25	200	29131.22381	-1.2201985	-0.642454039	3.715091922
1903-0007-TUR	Earthquake	1903	7	6	Richter	1903	4	29	1903	4	29	3560	60000	218567.5782	1.6600488	-0.642454039	3.715091922
1988-0144-IRN	Earthquake	1988	144	6	Richter	1988	3	30	1988	3	30	12.67988394	3030	40192.48656	-0.81671023	-0.642454039	3.715091922
1988-0079-BGD	Earthquake	1988	79	6	Richter	1988	2	6	1988	2	6	2	100	15229.60508	-2.182874	-0.642454039	3.715091922
1960-0002-IRN	Earthquake	1960	2	6	Richter	1960	4	24	1960	4	24	480	164553.728	20000	0.85717607	-0.642454039	3.715091922
1988-0041-IRN	Earthquake	1988	41	6	Richter	1988	8	11	1988	8	11	1	10000	28919.85116	-1.3536288	-0.642454039	3.715091922
1988-0035-CHN	Earthquake	1988	35	6	Richter	1988	1	4	1988	1	4	34.27307074	50060	79962.5326	0.13957217	-0.642454039	3.715091922
1903-0014-ISR	Earthquake	1903	14	6	Richter	1903	3	30	1903	3	30	20	24920.36344	63391.4517	-0.19107026	-0.642454039	3.715091922
1987-0229-JPN	Earthquake	1987	229	6	Richter	1987	12	17	1987	12	17	2	22652	38463.66264	-0.94636977	-0.642454039	3.715091922
1903-0015-TUR	Earthquake	1903	15	6	Richter	1903	5	28	1903	5	28	1000	437352.9106	235084.0479	1.7084736	-0.642454039	3.715091922
1956-0038-IND	Earthquake	1956	38	6	Richter	1956	7	21	1956	7	21	113	219	40607.41042	-0.71893585	-0.642454039	3.715091922
1904-0007-TWN	Earthquake	1904	7	6	Richter	1904	4	24	1904	4	24	3	208	18792.73747	-1.8867112	-0.642454039	3.715091922
1960-0010-MAR	Earthquake	1960	10	6	Richter	1960	2	29	1960	2	29	12000	25000	120000	1.7177188	-0.642454039	3.715091922
1904-0008-GRC	Earthquake	1904	8	6	Richter	1904	8	11	1904	8	11	4	1620	28347.5838	-1.327024	-0.642454039	3.715091922
1904-0009-TWN	Earthquake	1904	9	6	Richter	1904	11	6	1904	11	6	145	2141	63168.82152	-0.119630024	-0.642454039	3.715091922
1956-0005-LBN	Earthquake	1956	5	6	Richter	1956	3	16	1956	3	16	136	200	41568.09035	-0.6806087	-0.642454039	3.715091922
1988-0702-ALB	Earthquake	1988	702	6	Richter	1988	1	9	1988	1	9	7.504037103	690	27960.22941	-1.3212068	-0.642454039	3.715091922
1960-0033-DZA	Earthquake	1960	33	6	Richter	1960	2	21	1960	2	21	57	1250	47365.51345	-0.5397779	-0.642454039	3.715091922
1956-0002-IRN	Earthquake	1956	2	6	Richter	1956	10	31	1956	10	31	350	202731.0526	165377.2867	1.198716	-0.642454039	3.715091922
1987-0179-USA	Earthquake	1987	179	6	Richter	1987	10	1	1987	10	1	8	2200	213000	-0.7015245	-0.642454039	3.715091922
1961-0060-IRN	Earthquake	1961	60	6	Richter	1961	6	11	1961	6	11	60	55716.58511	91596.07118	0.34237796	-0.642454039	3.715091922
1955-0057-CRI	Earthquake	1955	57	6	Richter	1955	9	1	1955	9	1	10	14999.90508	50254.96853	-0.52763873	-0.642454039	3.715091922
1985-0110-IDN	Earthquake	1985	110	6	Richter	1985	9	15	1985	9	15	10	7	13554.71895	-2.2765121	-0.642454039	3.715091922
1965-0002-DZA	Earthquake	1965	2	6	Richter	1965	1	1	1965	1	1	2	49350	2000	-1.3376589	-0.642454039	3.715091922
1984-0124-IND	Earthquake	1984	124	6	Richter	1984	12	31	1984	12	31	20	10900	55039.55452	-0.37962344	-0.642454039	3.715091922
1983-0171-GRC	Earthquake	1983	171	6	Richter	1983	3	24	1983	3	24	6.63203906	487	25670.1007	-1.4400074	-0.642454039	3.715091922
1983-0197-USA	Earthquake	1983	197	6	Richter	1983	11	16	1983	11	16	1.34097183	6	6250	-3.0117707	-0.642454039	3.715091922
1983-0432-IRN	Earthquake	1983	432	6	Richter	1983	7	22	1983	7	22	3	416	5000	-1.9942396	-0.642454039	3.715091922
1917-0009-GTM	Earthquake	1917	9	6	Richter	1917	12	25	1917	12	25	2650	892904.9557	325851.5726	2.1816862	-0.642454039	3.715091922
1984-0015-IDN	Earthquake	1984	15	6	Richter	1984	1	10	1984	1	10	2	89	14929.39074	-2.209446	-0.642454039	3.715091922
1916-0016-TWN	Earthquake	1916	16	6	Richter	1916	11	15	1916	11	15	1	311	15984.13952	-2.1449766	-0.642454039	3.715091922
1917-0021-TWN	Earthquake	1917	21	6	Richter	1917	1	5	1917	1	5	54	475	39695.47749	-0.77762896	-0.642454039	3.715091922
1951-0046-CHN	Earthquake	1951	46	6	Richter	1951	8	19	1951	8	19	50.50772044	149450	104565.2816	0.51249593	-0.642454039	3.715091922
1966-0141-TUR	Earthquake	1966	141	6	Richter	1966	3	7	1966	3	7	10	14999.90508	50254.96853	-0.52763873	-0.642454039	3.715091922
1966-0143-IND	Earthquake	1966	143	6	Richter	1966	8	15	1966	8	15	15	20186.11618	57566.98199	-0.33075872	-0.642454039	3.715091922
1984-0038-ITA	Earthquake	1984	38	6	Richter	1984	4	29	1984	4	29	14.23607803	4200	43543.64171	-0.70537883	-0.642454039	3.715091922
1915-0004-USA	Earthquake	1915	4	6	Richter	1915	6	22	1915	6	22	6	4908.557438	1000	-1.6114061	-0.642454039	3.715091922
1984-0309-AFG	Earthquake	1984	309	6	Richter	1984	2	2	1984	2	2	1	35	5000	-2.7883282	-0.642454039	3.715091922
1952-0006-USA	Earthquake	1952	6	6	Richter	1952	8	22	1952	8	22	2	270	10000	-2.0650873	-0.642454039	3.715091922
1914-0030-GRC	Earthquake	1914	30	6	Richter	1930	11	27	1930	11	27	14	19191.48361	56251.63112	-0.36425933	-0.642454039	3.715091922
1966-0068-GRC	Earthquake	1966	68	6	Richter	1966	9	1	1966	9	1	1	15123	14000	-1.4058948	-0.642454039	3.715091922
1952-0014-TUR	Earthquake	1952	14	6	Richter	1952	1	3	1952	1	3	103	250	40736.31048	-0.7182672	-0.642454039	3.715091922
1952-0041-CHN	Earthquake	1952	41	6	Richter	1952	12	8	1952	12	8	5.585353486	300	22794.098	-1.6051973	-0.642454039	3.715091922
1983-0162-PNG	Earthquake	1983	162	6	Richter	1983	12	22	1983	12	22	10	14999.90508	50254.96853	-0.52763873	-0.642454039	3.715091922
1965-0108-GRC	Earthquake	1965	108	6	Richter	2020	4	5	2020	4	5	32	200	30680.46776	-1.1415559	-0.642454039	3.715091922
1966-0026-GRC	Earthquake	1966	26	6	Richter	1966	2	5	1966	2	5	1	11050	4000	-1.6982269	-0.642454039	3.715091922
1985-0055-CHN	Earthquake	1985	55	6	Richter	1985	4	18	1985	4	18	22	300	30394.17087	-1.1684692	-0.642454039	3.715091922
1966-0051-NPL	Earthquake	1966	51	6	Richter	1966	6	27	1966	6	27	80	20100	1000	-0.60922116	-0.642454039	3.715091922
1951-0038-NIC	Earthquake	1951	38	6	Richter	1951	8	3	1951	8	3	500	263248.6355	186368.0469	1.3719051	-0.642454039	3.715091922
1967-0032-GRC	Earthquake	1967	32	6	Richter	1967	5	1	1967	5	1	9	16583	5000	-0.96228844	-0.642454039	3.715091922
1913-0009-PER	Earthquake	1913	9	6	Richter	1913	11	4	1913	11	4	150	108999.4966	124507.5034	0.7872973	-0.642454039	3.715091922
2009-0354-IDN	Earthquake	2009	354	7	Richter	2009	9	2	2009	9	2	128	339792	160000	1.012567	-0.194065044	4.611869912
2008-0536-IDN	Earthquake	2008	536	7	Richter	2008	11	16	2008	11	16	6	10077	42179.18776	-0.7810762	-0.194065044	4.611869912
1951-0015-TUR	Earthquake	1951	15	7	Richter	1951	8	13	1951	8	13	54	150	32599.79169	-1.0404606	-0.194065044	4.611869912
1944-0010-TUR	Earthquake	1944	10	7	Richter	1944	10	6	1944	10	6	27	31046.10631	70096.34709	-0.04534981	-0.194065044	4.611869912
1944-0002-ARG	Earthquake	1944	2	7	Richter	1944	1	15	1944	1	15	10000	155000	100000	1.9917523	-0.194065044	4.611869912
2004-0532-JPN	Earthquake	2004	532	7	Richter	2004	10	23	2004	10	23	40	62183	28000000	1.3040761	-0.194065044	4.611869912
1942-0038-CHN	Earthquake	1942	38	7	Richter	1942	2	2	1942	2	2	90	74980.57182	104923.1456	0.539258	-0.194065044	4.611869912
1957-0013-IRN	Earthquake	1957	13	7	Richter	1957	12	13	1957	12	13	3000	5000	5000	0.4281744	-0.194065044	4.611869912
1951-0012-SLV	Earthquake	1951	12	7	Richter	1951	5	6	1951	5	6	1100	293886.9446	23000	1.2290432	-0.194065044	4.611869912
1942-0011-TUR	Earthquake	1942	11	7	Richter	1942	12	20	1942	12	20	3000	977827.2351	339679.4737	2.241922	-0.194065044	4.611869912
1949-0010-ECU	Earthquake	1949	10	7	Richter	1949	8	5	1949	8	5	6000	100000	20000	1.4662915	-0.194065044	4.611869912
1943-0051-TUR	Earthquake	1943	51	7	Richter	1943	1	20	1943	1	20	285	174411.7666	154377.5508	1.0989594	-0.194065044	4.611869912
2009-0112-IDN	Earthquake	2009	112	7	Richter	2009	2	11	2009	2	11	10.63241963	3049	9000	-1.1403002	-0.194065044	4.611869912
1943-0027-JPN	Earthquake	1943	27	7	Richter	1943	9	10	1943	9	10	1400	23217	152778.1989	1.1462357	-0.194065044	4.611869912
1951-0044-TWN	Earthquake	1951	44	7	Richter	1951	10	22	1951	10	22	68	12496	72840.09874	0.04139419	-0.194065044	4.611869912
1957-0008-IRN	Earthquake	1957	8	7	Richter	1957	7	2	1957	7	2	2500	10000	15000	0.7156566	-0.194065044	4.611869912
1949-0019-TUR	Earthquake	1949	19	7	Richter	1949	8	17	1949	8	17	320	355	54870.07022	-0.27718082	-0.194065044	4.611869912
1943-0024-IDN	Earthquake	1943	24	7	Richter	1943	7	23	1943	7	23	213	16096	96657.88043	0.46286	-0.194065044	4.611869912
2009-0205-HND	Earthquake	2009	205	7	Richter	2009	5	28	2009	5	28	7	50136	100000	-0.2636074	-0.194065044	4.611869912
1949-0029-CHN	Earthquake	1949	29	7	Richter	1949	2	23	1949	2	23	21	5067	48784.96696	-0.5387454	-0.194065044	4.611869912
1950-0036-IDN	Earthquake	1950	36	7	Richter	1950	6	19	1950	6	19	16	50	20932.26541	-1.6784731	-0.194065044	4.611869912
1950-0029-VEN	Earthquake	1950	29	7	Richter	1950	8	3	1950	8	3	100	80995.37765	108692.8731	0.59041727	-0.194065044	4.611869912
2006-0100-MOZ	Earthquake	2006	100	7	Richter	2006	2	22	2006	2	22	4	1476	27900.3045	-1.3482503	-0.194065044	4.611869912
2006-0688-TWN	Earthquake	2006	688	7	Richter	2006	12	26	2006	12	26	2	42	13131.73372	-2.3806798	-0.194065044	4.611869912
2009-0421-IDN	Earthquake	2009	421	7	Richter	2009	9	30	2009	9	30	1195	2501798	2200000	2.5128834	-0.194065044	4.611869912
1948-0005-JPN	Earthquake	1948	5	7	Richter	1948	6	28	1948	6	28	5131	326000	1000000	2.3750427	-0.194065044	4.611869912
2008-0454-KGZ	Earthquake	2008	454	7	Richter	2008	10	5	2008	10	5	74	1197	49663.93203	-0.4665053	-0.194065044	4.611869912
1952-0038-JPN	Earthquake	1952	38	7	Richter	1952	3	10	1952	3	10	5.934752986	356	23771.27568	-1.5468422	-0.194065044	4.611869912
1947-0001-IRN	Earthquake	1947	1	7	Richter	1947	9	23	1947	9	23	400	223558.907	172943.587	1.2635543	-0.194065044	4.611869912
1954-0031-PHL	Earthquake	1954	31	7	Richter	1954	7	2	1954	7	2	13	101	22597.29722	-1.5843023	-0.194065044	4.611869912
1954-0017-DZA	Earthquake	1954	17	7	Richter	1954	9	9	1954	9	9	1250	134250	6000	0.8634195	-0.194065044	4.611869912
2007-0572-BRB	Earthquake	2007	572	7	Richter	2007	11	29	2007	11	29	1.739316862	101	18794.48898	-2.1812875	-0.194065044	4.611869912
1952-0040-CHN	Earthquake	1952	40	7	Richter	1952	8	17	1952	8	17	54	3870	56804.83132	-0.29931644	-0.194065044	4.611869912
2007-0565-IDN	Earthquake	2007	565	7	Richter	2007	11	25	2007	11	25	3	21800	41607.09451	-0.8259419	-0.194065044	4.611869912
1953-0022-PER	Earthquake	1953	22	7	Richter	1953	12	12	1953	12	12	9	1020	31053.68344	-1.1741712	-0.194065044	4.611869912
1948-0032-GRC	Earthquake	1948	32	7	Richter	1948	4	22	1948	4	22	2	11375	34193.29778	-1.1034356	-0.194065044	4.611869912
1953-0021-CHL	Earthquake	1953	21	7	Richter	1953	12	6	1953	12	6	3	15	7310	-2.5774171	-0.194065044	4.611869912
2007-0433-COL	Earthquake	2007	433	7	Richter	2007	9	10	2007	9	10	4.613819061	175	19971.49445	-1.7889746	-0.194065044	4.611869912
1953-0001-GRC	Earthquake	1953	1	7	Richter	1953	8	12	1953	8	12	476	141277	100000	1.1211776	-0.194065044	4.611869912
1948-0011-SUN	Earthquake	1948	11	7	Richter	1948	10	5	1948	10	5	110000	6415255.576	25000	3.139551	-0.194065044	4.611869912
1953-0010-TUR	Earthquake	1953	10	7	Richter	1953	3	18	1953	3	18	1200	50000	3570	0.5622596	-0.194065044	4.611869912
1953-0009-IRN	Earthquake	1953	9	7	Richter	1953	2	12	1953	2	12	970	427704.6804	232697.327	1.6936835	-0.194065044	4.611869912
1946-0029-TWN	Earthquake	1946	29	7	Richter	1946	12	5	1946	12	5	58	3884	57698.86304	-0.2757283	-0.194065044	4.611869912
1954-0044-GRC	Earthquake	1954	44	7	Richter	1954	4	30	1954	4	30	31	200	3150	-1.5695317	-0.194065044	4.611869912
2007-0258-JPN	Earthquake	2007	258	7	Richter	2007	7	16	2007	7	16	9	14000	12500000	0.4449592	-0.194065044	4.611869912
1948-0033-CHN	Earthquake	1948	33	7	Richter	1948	5	25	1948	5	25	800	3200	96829.52398	0.5160868	-0.194065044	4.611869912
1949-0008-SUN	Earthquake	1949	8	7	Richter	1949	7	10	1949	7	10	3500	1094692.401	357682.7312	2.3167722	-0.194065044	4.611869912
2004-0575-COL	Earthquake	2004	575	7	Richter	2004	11	15	2004	11	15	17.91819708	8036	51054.90214	-0.48414648	-0.194065044	4.611869912
2005-0686-AFG	Earthquake	2005	686	7	Richter	2005	12	13	2005	12	13	5	501	24309.76153	-1.5235333	-0.194065044	4.611869912
2005-0129-JPN	Earthquake	2005	129	7	Richter	2005	3	20	2005	3	20	1	3535	400000	-1.0743687	-0.194065044	4.611869912
2004-0607-IDN	Earthquake	2004	607	7	Richter	2004	11	26	2004	11	26	32	12833	55000	-0.2160995	-0.194065044	4.611869912
1946-0014-PER	Earthquake	1946	14	7	Richter	1946	11	10	1946	11	10	1400	559566.9554	263135.398	1.8718529	-0.194065044	4.611869912
1949-0006-USA	Earthquake	1949	6	7	Richter	1949	4	13	1949	4	13	8	11256.70636	25000	-0.77508736	-0.194065044	4.611869912
1945-0015-JPN	Earthquake	1945	15	7	Richter	1945	1	13	1945	1	13	2306	22559	168818.4025	1.2986609	-0.194065044	4.611869912
2008-0275-JPN	Earthquake	2008	275	7	Richter	2008	7	23	2008	7	24	1	470	110000	-1.7086704	-0.194065044	4.611869912
1949-0005-CHL	Earthquake	1949	5	7	Richter	1949	4	19	1949	4	19	35	155	39000	-1.1223975	-0.194065044	4.611869912
2008-0242-JPN	Earthquake	2008	242	7	Richter	2008	6	13	2008	6	13	23	448	167000	-0.76351655	-0.194065044	4.611869912
2005-0671-COD	Earthquake	2005	671	7	Richter	2005	12	5	2005	12	5	8	6505	60193.30095	-0.7211009	-0.194065044	4.611869912
1948-0034-CHN	Earthquake	1948	34	7	Richter	1948	6	27	1948	6	27	110	4000	66327.75156	-0.06512029	-0.194065044	4.611869912
2007-0101-JPN	Earthquake	2007	101	7	Richter	2007	3	25	2007	3	25	1	41027	250000	-0.6790271	-0.194065044	4.611869912
1946-0023-SUN	Earthquake	1946	23	7	Richter	1946	11	4	1946	11	4	400	223558.907	172943.587	1.2635543	-0.194065044	4.611869912
2008-0071-IDN	Earthquake	2008	71	7	Richter	2008	2	20	2008	2	20	3	25	13085.49258	-2.3698046	-0.194065044	4.611869912
2006-0704-USA	Earthquake	2006	704	7	Richter	2006	10	15	2006	10	15	15.58625363	3529	150000	-0.48650298	-0.194065044	4.611869912
1941-0035-TWN	Earthquake	1941	35	7	Richter	1941	12	17	1941	12	17	319	5304	87033.85684	0.3384055	-0.194065044	4.611869912
1932-0018-MEX	Earthquake	1932	18	7	Richter	1932	6	22	1932	6	22	10.94342145	2000	36299.1456	-0.9583512	-0.194065044	4.611869912
2010-0017-HTI	Earthquake	2010	17	7	Richter	2010	1	12	2010	1	12	222570	3700000	8000000	4.2906923	-0.194065044	4.611869912
2017-0530-IDN	Earthquake	2017	530	7	Richter	2017	12	15	2017	12	15	4	8895	37920.97492	-0.9386948	-0.194065044	4.611869912
1911-0021-TJK	Earthquake	1911	21	7	Richter	1911	2	18	1911	2	18	90	74980.57182	104923.1456	0.539258	-0.194065044	4.611869912
2017-0446-IRN	Earthquake	2017	446	7	Richter	2017	11	12	2017	11	12	454	214969	782934.6989	1.5693305	-0.194065044	4.611869912
1911-0022-IRN	Earthquake	1911	22	7	Richter	1911	4	18	1911	4	18	700	336810.923	208606.3713	1.5352844	-0.194065044	4.611869912
2017-0387-MEX	Earthquake	2017	387	7	Richter	2017	9	19	2017	9	19	369	256000	6000000	1.9205831	-0.194065044	4.611869912
2017-0331-CHN	Earthquake	2017	331	7	Richter	2017	8	8	2017	8	8	29	218325	500000	0.7197898	-0.194065044	4.611869912
2017-0280-GRC	Earthquake	2017	280	7	Richter	2017	7	21	2017	7	21	7.958308975	480	39547.96527	-1.312249	-0.194065044	4.611869912
2017-0247-PHL	Earthquake	2017	247	7	Richter	2017	7	6	2017	7	6	3	16500	4364	-1.2958533	-0.194065044	4.611869912
1913-0028-CHN	Earthquake	1913	28	7	Richter	1913	12	21	1913	12	21	942	112	56514.68832	-0.19627023	-0.194065044	4.611869912
2017-0050-PHL	Earthquake	2017	50	7	Richter	2017	2	10	2017	2	10	8	16857	13974	-0.8028109	-0.194065044	4.611869912
2016-0537-PHL	Earthquake	2016	537	7	Richter	2016	3	30	2016	3	30	8	202	22973.57424	-1.580921	-0.194065044	4.611869912
1914-0025-JPN	Earthquake	1914	25	7	Richter	1914	3	16	1914	3	16	94	1920	56611.89636	-0.28255334	-0.194065044	4.611869912
2018-0011-PER	Earthquake	2018	11	7	Richter	2018	1	14	2018	1	14	2	9319	33048.27015	-1.148894	-0.194065044	4.611869912
1914-0029-TUR	Earthquake	1914	29	7	Richter	1914	10	4	1914	10	4	4000	51700	218354.2538	1.6632242	-0.194065044	4.611869912
2016-0475-IDN	Earthquake	2016	475	7	Richter	2016	12	7	2016	12	7	104	86018	100000	0.59787536	-0.194065044	4.611869912
1915-0014-CHN	Earthquake	1915	14	7	Richter	1915	12	3	1915	12	3	170	119463.3004	129839.4125	0.8480722	-0.194065044	4.611869912
2016-0383-MMR	Earthquake	2016	383	7	Richter	2016	8	24	2016	8	24	4	1152	10000	-1.5858779	-0.194065044	4.611869912
2016-0358-ITA	Earthquake	2016	358	7	Richter	2016	10	30	2016	10	30	29.37955523	22292	200000	0.10621833	-0.194065044	4.611869912
1916-0015-TWN	Earthquake	1916	15	7	Richter	1916	8	28	1916	8	28	180	1842	64424.68616	-0.08504622	-0.194065044	4.611869912
1917-0003-IDN	Earthquake	1917	3	7	Richter	1917	1	21	1917	1	21	15000	3178103.099	582424.5465	3.0234094	-0.194065044	4.611869912
1917-0014-CHN	Earthquake	1917	14	7	Richter	1917	7	31	1917	7	31	1800	672645.7231	286249.7271	1.9938827	-0.194065044	4.611869912
2016-0151-ECU	Earthquake	2016	151	7	Richter	2016	5	18	2016	5	18	1	147	14063.33781	-2.315844	-0.194065044	4.611869912
2016-0121-JPN	Earthquake	2016	121	7	Richter	2016	4	16	2016	4	16	49	298432	20000000	1.6072354	-0.194065044	4.611869912
2016-0107-JPN	Earthquake	2016	107	7	Richter	2016	4	14	2016	4	14	9	120800	70203.36207	-0.08553669	-0.194065044	4.611869912
2016-0100-PAK	Earthquake	2016	100	7	Richter	2016	4	10	2016	4	10	6	142	20363.56403	-1.7529312	-0.194065044	4.611869912
1918-0020-CHN	Earthquake	1918	20	7	Richter	1918	2	13	1918	2	13	10000	2361586.002	508446.4659	2.8265297	-0.194065044	4.611869912
2016-0480-CHN	Earthquake	2016	480	7	Richter	2016	11	25	2016	11	25	1	37200	5500	-1.4009914	-0.194065044	4.611869912
2016-0002-BGD	Earthquake	2016	2	7	Richter	2016	1	3	2016	1	3	13	10878	92368.05975	-0.405286	-0.194065044	4.611869912
1909-0022-PAK	Earthquake	1909	22	7	Richter	1909	10	21	1909	10	21	231	149540.6883	143886.1883	0.996956	-0.194065044	4.611869912
1909-0020-CHN	Earthquake	1909	20	7	Richter	1909	5	11	1909	5	11	21	25826.93191	64436.14961	-0.16737942	-0.194065044	4.611869912
2020-0034-TUR	Earthquake	2020	34	7	Richter	2020	1	24	2020	1	24	41	70607	88052.2108	0.27508113	-0.194065044	4.611869912
2019-0619-PHL	Earthquake	2019	619	7	Richter	2019	12	15	2019	12	15	14	394565	94288.43908	0.32511178	-0.194065044	4.611869912
1902-0013-AZE	Earthquake	1902	13	7	Richter	1902	2	13	1902	2	13	86	17540	81084.27557	0.19352286	-0.194065044	4.611869912
2019-0529-PHL	Earthquake	2019	529	7	Richter	2019	10	31	2019	10	31	23	260703	97491.08513	0.38877127	-0.194065044	4.611869912
2019-0522-PHL	Earthquake	2019	522	7	Richter	2019	10	29	2019	10	29	10	26025	55215.75097	-0.40199757	-0.194065044	4.611869912
1903-0016-IRN	Earthquake	1903	16	7	Richter	1903	9	25	1903	9	25	350	202731.0526	165377.2867	1.198716	-0.194065044	4.611869912
2019-0451-IDN	Earthquake	2019	451	7	Richter	2019	9	26	2019	9	26	31	247418	102871.2839	0.47193676	-0.194065044	4.611869912
2019-0377-IDN	Earthquake	2019	377	7	Richter	2019	8	2	2019	8	2	6	2104	32275.55611	-1.1382471	-0.194065044	4.611869912
1905-0001-ITA	Earthquake	1905	1	7	Richter	1905	9	8	1905	9	8	557	22100	124849.2954	0.8413773	-0.194065044	4.611869912
2019-0334-IDN	Earthquake	2019	334	7	Richter	2019	7	14	2019	7	14	8	11804	46031.96529	-0.65336025	-0.194065044	4.611869912
1905-0008-ALB	Earthquake	1905	8	7	Richter	1905	6	1	1905	6	1	120	67664.97011	23800	0.32646513	-0.194065044	4.611869912
2019-0306-USA	Earthquake	2019	306	7	Richter	2019	7	5	2019	7	5	5.772942688	150	200000	-1.3323317	-0.194065044	4.611869912
1909-0021-JPN	Earthquake	1909	21	7	Richter	1909	8	14	1909	8	14	41	2928	51119.07113	-0.45065704	-0.194065044	4.611869912
1906-0001-TWN	Earthquake	1906	1	7	Richter	1906	3	17	1906	3	17	1258	20452	146185.251	1.0832511	-0.194065044	4.611869912
1906-0028-TWN	Earthquake	1906	28	7	Richter	1906	4	13	1906	4	13	15	5466	46050.88278	-0.6286526	-0.194065044	4.611869912
2019-0023-CHL	Earthquake	2019	23	7	Richter	2019	1	19	2019	1	19	2	780	21632.16506	-1.7144966	-0.194065044	4.611869912
1907-0004-JAM	Earthquake	1907	4	7	Richter	1907	1	14	1907	1	14	1200	90000	30000	1.0697109	-0.194065044	4.611869912
1907-0006-CHN	Earthquake	1907	6	7	Richter	1907	10	21	1907	10	21	12000	2698944.251	540471.3992	2.9150586	-0.194065044	4.611869912
2018-0330-JPN	Earthquake	2018	330	7	Richter	2018	9	6	2018	9	6	44	3380	1250000	0.18589862	-0.194065044	4.611869912
1908-0007-ITA	Earthquake	1908	7	7	Richter	1908	12	28	1908	12	28	75000	150000	116000	2.576657	-0.194065044	4.611869912
2018-0317-PNG	Earthquake	2018	317	7	Richter	2018	3	7	2018	3	7	25	29344.62259	68312.10867	-0.08271942	-0.194065044	4.611869912
2018-0315-MEX	Earthquake	2018	315	7	Richter	2018	2	16	2018	2	16	12.64120223	3004	40107.62425	-0.8196488	-0.194065044	4.611869912
2018-0302-IDN	Earthquake	2018	302	7	Richter	2018	8	19	2018	8	19	10	779	5000	-1.5339077	-0.194065044	4.611869912
1909-0018-TWN	Earthquake	1909	18	7	Richter	1909	4	15	1909	4	15	9	417	26652.9528	-1.3781269	-0.194065044	4.611869912
2018-0257-IDN	Earthquake	2018	257	7	Richter	2018	8	5	2018	8	5	564	516927	790000	1.804182	-0.194065044	4.611869912
1909-0019-PRT	Earthquake	1909	19	7	Richter	1909	4	23	1909	4	23	30	33536.56935	72614.80173	0.005809797	-0.194065044	4.611869912
2019-0233-SLV	Earthquake	2019	233	7	Richter	2019	5	30	2019	5	30	1	160	14268.42389	-2.2965217	-0.194065044	4.611869912
2015-0608-TLS	Earthquake	2015	608	7	Richter	2015	11	4	2015	11	4	8.420562049	2003	4000	-1.4374818	-0.194065044	4.611869912
2015-0528-TJK	Earthquake	2015	528	7	Richter	2015	12	7	2015	12	7	2	7976	5000	-1.5271909	-0.194065044	4.611869912
2015-0415-IDN	Earthquake	2015	415	7	Richter	2015	9	24	2015	9	24	20.80511602	12247	56613.23814	-0.3404823	-0.194065044	4.611869912
1935-0006-TWN	Earthquake	1935	6	7	Richter	1935	7	17	1935	7	17	2746	156004	243679.222	1.7952228	-0.194065044	4.611869912
1936-0015-IDN	Earthquake	1936	15	7	Richter	1936	8	24	1936	8	24	9	20	15862.82398	-2.0706985	-0.194065044	4.611869912
1936-0027-CHN	Earthquake	1936	27	7	Richter	1936	2	7	1936	2	7	33.82850372	48250	79243.55035	0.12701577	-0.194065044	4.611869912
2012-0126-CHL	Earthquake	2012	126	7	Richter	2012	3	25	2012	3	25	1	24297	100000	-0.9507053	-0.194065044	4.611869912
2012-0124-MEX	Earthquake	2012	124	7	Richter	2012	3	20	2012	3	20	2	49011	320000	-0.40459487	-0.194065044	4.611869912
2012-0031-PHL	Earthquake	2012	31	7	Richter	2012	2	6	2012	2	6	113	320277	8900	0.4341176	-0.194065044	4.611869912
2011-0512-MEX	Earthquake	2011	512	7	Richter	2011	12	11	2011	12	11	2	152	16358.97169	-2.0874004	-0.194065044	4.611869912
1936-0033-TWN	Earthquake	1936	33	7	Richter	1936	8	22	1936	8	22	10	75	20326.20281	-1.7357495	-0.194065044	4.611869912
2011-0443-PER	Earthquake	2011	443	7	Richter	2011	10	28	2011	10	28	1	2681	23095.24053	-1.6537907	-0.194065044	4.611869912
2011-0397-TUR	Earthquake	2011	397	7	Richter	2011	10	23	2011	10	23	604	32938	1500000	1.4002243	-0.194065044	4.611869912
2011-0389-IDN	Earthquake	2011	389	7	Richter	2011	9	5	2011	9	5	10	9791.313997	5850	-1.0074537	-0.194065044	4.611869912
1938-0002-TUR	Earthquake	1938	2	7	Richter	1938	4	19	1938	4	19	149	800	53696.00012	-0.3354255	-0.194065044	4.611869912
1932-0020-GRC	Earthquake	1932	20	7	Richter	1932	9	26	1932	9	26	151	22641	95322.07288	0.431065	-0.194065044	4.611869912
2011-0351-BTN	Earthquake	2011	351	7	Richter	2011	9	18	2011	9	18	127	768301	297431.3827	1.2848903	-0.194065044	4.611869912
2011-0104-PAK	Earthquake	2011	104	7	Richter	2011	1	18	2011	1	18	2	1000	22570.19171	-1.6578429	-0.194065044	4.611869912
2011-0090-CHN	Earthquake	2011	90	7	Richter	2011	3	24	2011	3	24	94.01921781	30801	66433.00474	0.29246247	-0.194065044	4.611869912
1939-0026-JPN	Earthquake	1939	26	7	Richter	1939	5	1	1939	5	1	27	1489	41718.57577	-0.73792493	-0.194065044	4.611869912
1940-0001-ROU	Earthquake	1940	1	7	Richter	1940	11	10	1940	11	10	980	230690.925	10000	0.99576575	-0.194065044	4.611869912
1940-0008-USA	Earthquake	1940	8	7	Richter	1940	5	18	1940	5	18	9	12864.38139	33000	-0.6647597	-0.194065044	4.611869912
2010-0645-IRN	Earthquake	2010	645	7	Richter	2010	12	20	2010	12	20	7	25	15632.4831	-2.0998795	-0.194065044	4.611869912
1941-0016-MMR	Earthquake	1941	16	7	Richter	1941	12	26	1941	12	26	15	20186.11618	57566.98199	-0.33075872	-0.194065044	4.611869912
2010-0463-NZL	Earthquake	2010	463	7	Richter	2010	9	4	2010	9	4	103.5906281	300002	6500000	1.6108936	-0.194065044	4.611869912
2010-0238-IDN	Earthquake	2010	238	7	Richter	2010	6	16	2010	6	16	17	4600	45903.85452	-0.62811023	-0.194065044	4.611869912
2010-0169-CHN	Earthquake	2010	169	7	Richter	2010	4	14	2010	4	14	2968	112000	500000	1.8841815	-0.194065044	4.611869912
2010-0158-MEX	Earthquake	2010	158	7	Richter	2010	4	4	2010	4	4	2	25232	1150000	-0.2995789	-0.194065044	4.611869912
2010-0027-USA	Earthquake	2010	27	7	Richter	2010	1	10	2010	1	10	6.619425367	630	12500	-1.5224234	-0.194065044	4.611869912
2011-0130-JPN	Earthquake	2011	130	7	Richter	2011	4	7	2011	4	7	2	132	15969.38806	-2.119569	-0.194065044	4.611869912
2012-0407-GTM	Earthquake	2012	407	7	Richter	2012	11	7	2012	11	7	44	1321742	210000	1.0307232	-0.194065044	4.611869912
2012-0417-MMR	Earthquake	2012	417	7	Richter	2012	11	11	2012	11	11	38	1486	1170	-1.3006756	-0.194065044	4.611869912
1957-0016-TUR	Earthquake	1957	16	7	Richter	1957	5	26	1957	5	26	53	119	31212.83549	-1.0992043	-0.194065044	4.611869912
2015-0175-CHN	Earthquake	2015	175	7	Richter	2015	5	12	2015	5	12	159	30126.26459	150501.4884	0.58574903	-0.194065044	4.611869912
1923-0019-CHN	Earthquake	1923	19	7	Richter	1923	3	24	1923	3	24	5000	1421470.573	403082.113	2.4899611	-0.194065044	4.611869912
1923-0026-IRN	Earthquake	1923	26	7	Richter	1923	9	23	1923	9	23	290	176647.5075	155279.68	1.1074041	-0.194065044	4.611869912
1924-0005-ECU	Earthquake	1924	5	7	Richter	1924	3	3	1924	3	3	40	41401.89627	79961.76829	0.14549807	-0.194065044	4.611869912
1924-0010-CHN	Earthquake	1924	10	7	Richter	1924	7	3	1924	7	3	100	80995.37765	108692.8731	0.59041727	-0.194065044	4.611869912
1924-0011-TUR	Earthquake	1924	11	7	Richter	1924	9	13	1924	9	13	60	1140	47130.63415	-0.5444413	-0.194065044	4.611869912
1925-0002-CHN	Earthquake	1925	2	7	Richter	1925	3	16	1925	3	16	5000	1421470.573	403082.113	2.4899611	-0.194065044	4.611869912
1925-0010-PHL	Earthquake	1925	10	7	Richter	1925	8	7	1925	8	7	17	22123.95594	60032.23032	-0.26998383	-0.194065044	4.611869912
1925-0011-JPN	Earthquake	1925	11	7	Richter	1925	5	23	1925	5	23	395	9999	101440.4853	0.5510514	-0.194065044	4.611869912
2014-0234-GTM	Earthquake	2014	234	7	Richter	2014	7	7	2014	7	7	4	121783	85624.43364	-0.2743833	-0.194065044	4.611869912
2014-0174-GRC	Earthquake	2014	174	7	Richter	2014	5	24	2014	5	24	8.739849193	75326	473228.4384	0.16474015	-0.194065044	4.611869912
2014-0127-MEX	Earthquake	2014	127	7	Richter	2014	4	18	2014	4	18	6.079284151	381	24170.27369	-1.5237017	-0.194065044	4.611869912
2014-0111-NIC	Earthquake	2014	111	7	Richter	2014	4	11	2014	4	11	2	12281	3000	-1.5364021	-0.194065044	4.611869912
2014-0086-CHN	Earthquake	2014	86	7	Richter	2014	2	12	2014	2	12	76.8120183	450000	174000	0.9402786	-0.194065044	4.611869912
1927-0004-JPN	Earthquake	1927	4	7	Richter	1927	3	7	1927	3	7	3022	79540	40000	1.3569312	-0.194065044	4.611869912
1929-0012-IRN	Earthquake	1929	12	7	Richter	1929	5	1	1929	5	1	3253	1121	108654.7473	0.72377896	-0.194065044	4.611869912
2013-0484-PAK	Earthquake	2013	484	7	Richter	2013	9	28	2013	9	28	22	50	22379.26451	-1.5770228	-0.194065044	4.611869912
1930-0012-JPN	Earthquake	1930	12	7	Richter	1930	11	26	1930	11	26	259	26122	109392.8632	0.63556004	-0.194065044	4.611869912
2013-0409-PER	Earthquake	2013	409	7	Richter	2013	9	25	2013	9	25	17.13482274	7084	49500.1516	-0.52713937	-0.194065044	4.611869912
1930-0017-MMR	Earthquake	1930	17	7	Richter	1930	12	4	1930	12	4	36	38327.34545	77188.50347	0.094338655	-0.194065044	4.611869912
2013-0395-PHL	Earthquake	2013	395	7	Richter	2013	10	15	2013	10	15	230	3222224	51459	1.4099249	-0.194065044	4.611869912
1930-0025-IRN	Earthquake	1930	25	7	Richter	1930	5	6	1930	5	6	1360	547812.76	260592.3377	1.8577776	-0.194065044	4.611869912
2013-0268-NZL	Earthquake	2013	268	7	Richter	2013	7	21	2013	7	21	21.33169689	13840	50000	-0.33232027	-0.194065044	4.611869912
2013-0116-CHN	Earthquake	2013	116	7	Richter	2013	4	20	2013	4	20	198	2198785	6800000	2.19207	-0.194065044	4.611869912
1931-0004-NZL	Earthquake	1931	4	7	Richter	1931	2	3	1931	2	3	256	11000	25000	0.19052757	-0.194065044	4.611869912
2013-0058-COL	Earthquake	2013	58	7	Richter	2013	2	9	2013	2	9	14.21480761	10015	4000	-0.9745551	-0.194065044	4.611869912
1932-0009-IDN	Earthquake	1932	9	7	Richter	1932	5	14	1932	5	14	6	3075	34437.30455	-1.0517224	-0.194065044	4.611869912
2010-0003-SLB	Earthquake	2010	3	7	Richter	2010	1	3	2010	1	3	8.926890547	1126	31528.654	-1.1542258	-0.194065044	4.611869912
1958-0001-IRN	Earthquake	1958	1	7	Richter	1958	8	16	1958	8	16	191	984	58605.56928	-0.2091126	-0.194065044	4.611869912
1988-0675-SLB	Earthquake	1988	675	7	Richter	1988	8	10	1988	8	10	1	500	17334.82534	-2.0367098	-0.194065044	4.611869912
1958-0024-IDN	Earthquake	1958	24	7	Richter	1958	10	20	1958	10	20	8	3361	37140.8913	-0.93979645	-0.194065044	4.611869912
1980-0071-NPL	Earthquake	1980	71	7	Richter	1980	7	29	1980	7	29	100	240600	245000	0.95406044	-0.194065044	4.611869912
1997-0028-KGZ	Earthquake	1997	28	7	Richter	1997	1	9	1997	1	9	6.616179594	1230	2000	-1.7284576	-0.194065044	4.611869912
1996-0261-PER	Earthquake	1996	261	7	Richter	1996	11	12	1996	11	12	14	75970	71157.66961	-0.050535746	-0.194065044	4.611869912
1980-0096-DZA	Earthquake	1980	96	7	Richter	1980	10	10	1980	10	10	2633	930317	5200000	2.6979477	-0.194065044	4.611869912
1980-0097-MEX	Earthquake	1980	97	7	Richter	1980	10	24	1980	10	24	65	6300	64186.31515	-0.12913993	-0.194065044	4.611869912
1980-0103-ITA	Earthquake	1980	103	7	Richter	1980	11	23	1980	11	23	4689	407700	20000000	2.945346	-0.194065044	4.611869912
1996-0136-CHN	Earthquake	1996	136	7	Richter	1996	3	19	1996	3	19	26	33128	24000	-0.24049461	-0.194065044	4.611869912
1996-0021-CHN	Earthquake	1996	21	7	Richter	1996	2	3	1996	2	3	309	5077795	506000	2.0028167	-0.194065044	4.611869912
1996-0002-IDN	Earthquake	1996	2	7	Richter	1996	1	1	1996	1	1	9	13000	1200	-1.2728916	-0.194065044	4.611869912
1995-0454-MEX	Earthquake	1995	454	7	Richter	1995	10	20	1995	10	20	23.84861471	18000	62220.91573	-0.20918095	-0.194065044	4.611869912
1995-0252-IDN	Earthquake	1995	252	7	Richter	1995	10	7	1995	10	7	84	90218	106735.4366	0.5594622	-0.194065044	4.611869912
1981-0025-IDN	Earthquake	1981	25	7	Richter	1981	1	19	1981	1	19	306	2682	76789.20686	0.16966583	-0.194065044	4.611869912
1995-0226-ECU	Earthquake	1995	226	7	Richter	1995	10	2	1995	10	2	2	805	21749.07549	-1.707303	-0.194065044	4.611869912
1995-0203-MEX	Earthquake	1995	203	7	Richter	1995	9	14	1995	9	14	6	4670	21100	-1.0597801	-0.194065044	4.611869912
1995-0148-CHN	Earthquake	1995	148	7	Richter	1995	7	12	1995	7	12	11	1000136	36100	0.26366532	-0.194065044	4.611869912
1981-0026-CHN	Earthquake	1981	26	7	Richter	1981	1	24	1981	1	24	150	25850	97369.41102	0.4591717	-0.194065044	4.611869912
1995-0085-GRC	Earthquake	1995	85	7	Richter	1995	5	13	1995	5	13	26	15060	450000	0.14422667	-0.194065044	4.611869912
1995-0084-IDN	Earthquake	1995	84	7	Richter	1995	5	14	1995	5	14	15	176	25604.00922	-1.4120814	-0.194065044	4.611869912
1981-0033-GRC	Earthquake	1981	33	7	Richter	1981	2	24	1981	2	24	22	80400	900000	0.5543198	-0.194065044	4.611869912
1981-0056-IRN	Earthquake	1981	56	7	Richter	1981	6	11	1981	6	11	2000	3000	5000	0.21426508	-0.194065044	4.611869912
1981-0067-IRN	Earthquake	1981	67	7	Richter	1981	7	28	1981	7	28	1200	31000	1000000	1.5058224	-0.194065044	4.611869912
1995-0016-JPN	Earthquake	1995	16	7	Richter	1995	1	17	1995	1	17	5297	541636	100000000	3.3316338	-0.194065044	4.611869912
1995-0015-COL	Earthquake	1995	15	7	Richter	1995	1	19	1995	1	19	7	2845	35100.46988	-1.0203409	-0.194065044	4.611869912
1981-0093-MEX	Earthquake	1981	93	7	Richter	1981	10	24	1981	10	24	3	28	13341.3193	-2.3439636	-0.194065044	4.611869912
1982-0036-JPN	Earthquake	1982	36	7	Richter	1982	3	21	1982	3	21	8.853260353	1100	31348.52234	-1.162191	-0.194065044	4.611869912
1994-0518-PHL	Earthquake	1994	518	7	Richter	1994	11	15	1994	11	15	81	270866	3700	0.14638124	-0.194065044	4.611869912
1982-0127-AFG	Earthquake	1982	127	7	Richter	1982	12	16	1982	12	16	500	38000	1000	0.028950006	-0.194065044	4.611869912
1994-0307-CHN	Earthquake	1994	307	7	Richter	1994	9	15	1994	9	15	1	500	17334.82534	-2.0367098	-0.194065044	4.611869912
1994-0062-IDN	Earthquake	1994	62	7	Richter	1994	6	2	1994	6	2	239	8720	2200	-0.32184204	-0.194065044	4.611869912
1997-0045-TTO	Earthquake	1997	45	7	Richter	1997	4	22	1997	4	22	2.219419201	17	25000	-2.4107804	-0.194065044	4.611869912
1982-0291-MEX	Earthquake	1982	291	7	Richter	1982	6	7	1982	6	7	9	17	15428.4383	-2.107756	-0.194065044	4.611869912
1997-0071-MEX	Earthquake	1997	71	7	Richter	1997	1	12	1997	1	12	1	5000	25690.11749	-1.5116789	-0.194065044	4.611869912
1997-0147-VEN	Earthquake	1997	147	7	Richter	1997	7	9	1997	7	9	80	4183	81000	-0.108676784	-0.194065044	4.611869912
1999-0449-TUR	Earthquake	1999	449	7	Richter	1999	11	12	1999	11	12	845	224948	1000000	1.797205	-0.194065044	4.611869912
1974-0025-CHN	Earthquake	1974	25	7	Richter	1974	5		1974	5		20000	3923463.874	641352.7177	3.1630979	-0.194065044	4.611869912
1974-0026-JPN	Earthquake	1974	26	7	Richter	1974	5	9	1974	5	9	30	73	25479.91527	-1.3919258	-0.194065044	4.611869912
1975-0017-CHN	Earthquake	1975	17	7	Richter	1975	2	4	1975	2	4	10000	2361586.002	508446.4659	2.8265297	-0.194065044	4.611869912
1975-0053-TUR	Earthquake	1975	53	7	Richter	1975	9	6	1975	9	6	2385	53372	17000	1.0547024	-0.194065044	4.611869912
1999-0384-PER	Earthquake	1999	384	7	Richter	1999	4	3	1999	4	3	1	1550	21031.34077	-1.7787298	-0.194065044	4.611869912
1976-0037-ITA	Earthquake	1976	37	7	Richter	1976	5	6	1976	5	6	922	218222	3600000	2.0514898	-0.194065044	4.611869912
1976-0043-IDN	Earthquake	1976	43	7	Richter	1976	6	26	1976	6	26	420	15000	110127.9615	0.66307795	-0.194065044	4.611869912
1999-0208-MEX	Earthquake	1999	208	7	Richter	1999	6	15	1999	6	15	15	16200	226800	-0.12155478	-0.194065044	4.611869912
1999-0150-IRN	Earthquake	1999	150	7	Richter	1999	5	6	1999	5	6	20	4100	46572.1349	-0.6025743	-0.194065044	4.611869912
1999-0099-IND	Earthquake	1999	99	7	Richter	1999	3	28	1999	3	28	100	477894	2000	0.20370363	-0.194065044	4.611869912
1999-0065-IRN	Earthquake	1999	65	7	Richter	1999	3	4	1999	3	4	1	2690	23108.4679	-1.6530266	-0.194065044	4.611869912
1977-0137-ARG	Earthquake	1977	137	7	Richter	1977	11	23	1977	11	23	70	40100	80000	0.29595676	-0.194065044	4.611869912
1978-0027-JPN	Earthquake	1978	27	7	Richter	1978	1	14	1978	1	14	25	217	29540.08698	-1.2015967	-0.194065044	4.611869912
1978-0081-GRC	Earthquake	1978	81	7	Richter	1978	6	20	1978	6	20	50	600100	250000	0.9434006	-0.194065044	4.611869912
1979-0018-IRN	Earthquake	1979	18	7	Richter	1979	1	16	1979	1	16	199	5200	78560.23177	0.1835605	-0.194065044	4.611869912
1998-0353-ECU	Earthquake	1998	353	7	Richter	1998	8	4	1998	8	4	3	2040	27758.49281	-1.3661077	-0.194065044	4.611869912
1979-0025-PER	Earthquake	1979	25	7	Richter	1979	2	16	1979	2	16	13	1100	33981.03628	-1.0398076	-0.194065044	4.611869912
1958-0006-PER	Earthquake	1958	6	7	Richter	1958	1	15	1958	1	15	28	31884.11859	70955.62252	-0.027690794	-0.194065044	4.611869912
1979-0039-ALB	Earthquake	1979	39	7	Richter	1979	4	15	1979	4	15	156	310450	484399.5732	1.2541436	-0.194065044	4.611869912
1998-0169-BOL	Earthquake	1998	169	7	Richter	1998	5	22	1998	5	22	95	18050	83202.46204	0.23176548	-0.194065044	4.611869912
1998-0152-AFG	Earthquake	1998	152	7	Richter	1998	5	30	1998	5	30	4700	116935	10000	1.3010671	-0.194065044	4.611869912
1998-0043-IRN	Earthquake	1998	43	7	Richter	1998	3	14	1998	3	14	5	1500	29318.85496	-1.2734853	-0.194065044	4.611869912
1979-0103-IRN	Earthquake	1979	103	7	Richter	1979	11	14	1979	11	14	350	15055	106059.3834	0.6058302	-0.194065044	4.611869912
1979-0106-COL	Earthquake	1979	106	7	Richter	1979	11	23	1979	11	23	60	600	20000	-0.82842803	-0.194065044	4.611869912
1979-0114-IDN	Earthquake	1979	114	7	Richter	1979	12	15	1979	12	15	5	1500	29318.85496	-1.2734853	-0.194065044	4.611869912
1997-0326-CHN	Earthquake	1997	326	7	Richter	1997	4	6	1997	4	6	9	500089	89488.43693	0.23839727	-0.194065044	4.611869912
1997-0247-CHL	Earthquake	1997	247	7	Richter	1997	10	14	1997	10	14	8	53098	48000	-0.35008103	-0.194065044	4.611869912
1980-0001-AZO	Earthquake	1980	1	7	Richter	1980	1	1	1980	1	1	69	21900	80414.07015	0.17398097	-0.194065044	4.611869912
1997-0095-AFG	Earthquake	1997	95	7	Richter	1997	5	10	1997	5	10	1573	76344.05119	100010	1.334819	-0.194065044	4.611869912
1983-0065-CRI	Earthquake	1983	65	7	Richter	1983	4	2	1983	4	2	10	475	1000	-1.927469	-0.194065044	4.611869912
1983-0067-IDN	Earthquake	1983	67	7	Richter	1983	4	3	1983	4	3	2.692691995	100	1000	-2.601017	-0.194065044	4.611869912
1994-0007-IDN	Earthquake	1994	7	7	Richter	1994	2	16	1994	2	16	207	49399	170476	0.7797491	-0.194065044	4.611869912
1991-0114-CRI	Earthquake	1991	114	7	Richter	1991	4	22	1991	4	22	77	28479	165328.3112	0.38902202	-0.194065044	4.611869912
1991-0066-PER	Earthquake	1991	66	7	Richter	1991	4	4	1991	4	4	53	45750	86286.95211	0.2579193	-0.194065044	4.611869912
1991-0043-CHN	Earthquake	1991	43	7	Richter	1991	2	25	1991	2	25	32.42327576	42808	76951.49211	0.08621267	-0.194065044	4.611869912
1991-0033-AFG	Earthquake	1991	33	7	Richter	1991	1	31	1991	1	31	433	218004.7907	119160.7721	1.2122182	-0.194065044	4.611869912
1991-0001-MMR	Earthquake	1991	1	7	Richter	1991	1	5	1991	1	5	4.469539865	160	19537.33857	-1.819529	-0.194065044	4.611869912
1987-0058-PNG	Earthquake	1987	58	7	Richter	1987	2	9	1987	2	9	1	4000	2625	-1.9755132	-0.194065044	4.611869912
1990-0227-VUT	Earthquake	1990	227	7	Richter	1990	7	27	1990	7	27	0.945269105	2	6669.735476	-3.3136342	-0.194065044	4.611869912
1987-0068-NZL	Earthquake	1987	68	7	Richter	1987	3	2	1987	3	2	1	7025	210000	-1.0580131	-0.194065044	4.611869912
1987-0070-ECU	Earthquake	1987	70	7	Richter	1987	3	5	1987	3	5	5000	150000	1500000	2.2898715	-0.194065044	4.611869912
1990-0191-CRI	Earthquake	1990	191	7	Richter	1990	3	25	1990	3	25	5.650662506	310	22978.15011	-1.5940171	-0.194065044	4.611869912
1987-0144-CHL	Earthquake	1987	144	7	Richter	1987	8	8	1987	8	8	5	5112	1000	-1.6544602	-0.194065044	4.611869912
1990-0165-PAK	Earthquake	1990	165	7	Richter	1990	10	22	1990	10	22	11	250	25472.79614	-1.4308587	-0.194065044	4.611869912
1990-0118-IRN	Earthquake	1990	118	7	Richter	1990	11	6	1990	11	6	21	22400	232300	0.040740233	-0.194065044	4.611869912
1990-0099-CHN	Earthquake	1990	99	7	Richter	1990	4	26	1990	4	26	126	34319	58350	0.3717924	-0.194065044	4.611869912
1987-0213-IDN	Earthquake	1987	213	7	Richter	1987	11	26	1987	11	26	125	17100	5000	-0.2197438	-0.194065044	4.611869912
1990-0034-IRN	Earthquake	1990	34	7	Richter	1990	6	21	1990	6	21	40000	710000	8000000	3.4857485	-0.194065044	4.611869912
1990-0033-SDN	Earthquake	1990	33	7	Richter	1990	5	20	1990	5	20	17.88969714	8000	50998.71089	-0.4856774	-0.194065044	4.611869912
1990-0031-SUN	Earthquake	1990	31	7	Richter	1990	6	14	1990	6	14	1	20000	32555.62291	-1.1955788	-0.194065044	4.611869912
1990-0029-PER	Earthquake	1990	29	7	Richter	1990	5	29	1990	5	29	200	100800	1000	-0.035786375	-0.194065044	4.611869912
1990-0028-PHL	Earthquake	1990	28	7	Richter	1990	6	14	1990	6	14	4	15	12738.32958	-2.3946347	-0.194065044	4.611869912
1990-0020-BGR	Earthquake	1990	20	7	Richter	1990	5	30	1990	5	30	14	11145.30764	89325.88143	-0.3859354	-0.194065044	4.611869912
1990-0009-PHL	Earthquake	1990	9	7	Richter	1990	2	8	1990	2	8	1	34504	900	-1.7490488	-0.194065044	4.611869912
1987-0254-MEX	Earthquake	1987	254	7	Richter	1987	11	24	1987	11	24	5.11254268	3144	31307.1424	-1.1097113	-0.194065044	4.611869912
1988-0043-GTM	Earthquake	1988	43	7	Richter	1988	11	3	1988	11	3	5	500	24301.46462	-1.5239887	-0.194065044	4.611869912
1988-0382-IND	Earthquake	1988	382	7	Richter	1988	8	21	1988	8	21	382	20003766	71500	1.9713944	-0.194065044	4.611869912
1988-0383-NPL	Earthquake	1988	383	7	Richter	1988	8	20	1988	8	20	709	301016	60000	1.2873478	-0.194065044	4.611869912
1989-0133-USA	Earthquake	1989	133	7	Richter	1989	10	18	1989	10	18	62	3757	5600000	0.57878727	-0.194065044	4.611869912
1989-0073-MEX	Earthquake	1989	73	7	Richter	1989	4	25	1989	4	25	3	350	20540.08194	-1.7680516	-0.194065044	4.611869912
1988-0528-SUN	Earthquake	1988	528	7	Richter	1988	12	7	1988	12	7	25000	1642000	14000000	3.622015	-0.194065044	4.611869912
1991-0117-SUN	Earthquake	1991	117	7	Richter	1991	4	29	1991	4	29	270	251500	1700000	1.5974615	-0.194065044	4.611869912
1991-0124-IDN	Earthquake	1991	124	7	Richter	1991	6	20	1991	6	20	8.559101681	1000	30624.21746	-1.1946882	-0.194065044	4.611869912
1991-0165-IDN	Earthquake	1991	165	7	Richter	1991	7	4	1991	7	4	28	16191	18000	-0.41344023	-0.194065044	4.611869912
1986-0076-PNG	Earthquake	1986	76	7	Richter	1986	6	24	1986	6	24	5.244291457	1000	500	-2.0894358	-0.194065044	4.611869912
1994-0006-IDN	Earthquake	1994	6	7	Richter	1994	1	21	1994	1	21	7	200040	72589.29087	-0.050590243	-0.194065044	4.611869912
1994-0002-USA	Earthquake	1994	2	7	Richter	1994	1	17	1994	1	17	60	27000	30000000	1.2662977	-0.194065044	4.611869912
1983-0092-CRI	Earthquake	1983	92	7	Richter	1983	7	3	1983	7	3	2	5060	29773.98729	-1.288142	-0.194065044	4.611869912
1983-0109-PHL	Earthquake	1983	109	7	Richter	1983	8	18	1983	8	18	19	1901	2227	-1.3277874	-0.194065044	4.611869912
1983-0127-CHL	Earthquake	1983	127	7	Richter	1983	10	4	1983	10	4	4	1524	28053.26855	-1.3409531	-0.194065044	4.611869912
1983-0136-TUR	Earthquake	1983	136	7	Richter	1983	10	30	1983	10	30	1346	834137	25000	1.5059464	-0.194065044	4.611869912
1983-0165-PAK	Earthquake	1983	165	7	Richter	1983	12	31	1983	12	31	24	543	3000	-1.4538319	-0.194065044	4.611869912
1983-0166-AFG	Earthquake	1983	166	7	Richter	1983	12	16	1983	12	16	12	34503	3000	-0.8317944	-0.194065044	4.611869912
1993-0134-WLF	Earthquake	1993	134	7	Richter	1993	3	13	1993	3	13	5	20	14021.64949	-2.2579508	-0.194065044	4.611869912
1993-0076-PNG	Earthquake	1993	76	7	Richter	1993	10	13	1993	10	13	53	20200	5000	-0.42717826	-0.194065044	4.611869912
1984-0028-SUN	Earthquake	1984	28	7	Richter	1984	3	19	1984	3	19	24.80011041	20100	63927.87255	-0.17155652	-0.194065044	4.611869912
1984-0084-JPN	Earthquake	1984	84	7	Richter	1984	9	14	1984	9	14	20	23074.00231	43000	-0.2776619	-0.194065044	4.611869912
1992-0481-GEO	Earthquake	1992	481	7	Richter	1992	10	24	1992	10	24	1	10	8884.973785	-2.9287221	-0.194065044	4.611869912
1992-0256-CHN	Earthquake	1992	256	7	Richter	1992	7	31	1992	7	31	16.09111234	16000	3150	-0.89174235	-0.194065044	4.611869912
1973-0149-USA	Earthquake	1973	149	7	Richter	1973	4	26	1973	4	26	1.617151254	11	5750	-2.8555567	-0.194065044	4.611869912
1984-0335-JPN	Earthquake	1984	335	7	Richter	1984	8	6	1984	8	6	1.611167077	9	9645.33282	-2.8008006	-0.194065044	4.611869912
1984-0339-PAK	Earthquake	1984	339	7	Richter	1984	2	17	1984	2	17	4	12	12261.84218	-2.4455154	-0.194065044	4.611869912
1985-0024-ARG	Earthquake	1985	24	7	Richter	1985	1	26	1985	1	26	6	45238	54515.45297	-0.4386654	-0.194065044	4.611869912
1992-0151-COL	Earthquake	1992	151	7	Richter	1992	10	17	1992	10	17	11	1635	35108.7456	-1.0026551	-0.194065044	4.611869912
1992-0120-USA	Earthquake	1992	120	7	Richter	1992	4	25	1992	4	25	4.412222084	94	75000	-1.6800244	-0.194065044	4.611869912
1992-0082-KGZ	Earthquake	1992	82	7	Richter	1992	5	22	1992	5	22	4	50000	31000	-0.6364253	-0.194065044	4.611869912
1992-0079-NIC	Earthquake	1992	79	7	Richter	1992	9	1	1992	9	1	179	6179	25000	-0.022992885	-0.194065044	4.611869912
1992-0067-CUB	Earthquake	1992	67	7	Richter	1992	5	25	1992	5	25	16.02910142	5869	47267.76049	-0.59129286	-0.194065044	4.611869912
1992-0064-COD	Earthquake	1992	64	7	Richter	1992	9	11	1992	9	11	9	311	25350.33128	-1.4450033	-0.194065044	4.611869912
1985-0078-PAK	Earthquake	1985	78	7	Richter	1985	7	29	1985	7	29	5	12038	2000	-1.3584894	-0.194065044	4.611869912
1992-0022-TUR	Earthquake	1992	22	7	Richter	1992	3	13	1992	3	13	653	348850	750000	1.7583308	-0.194065044	4.611869912
1985-0101-CHN	Earthquake	1985	101	7	Richter	1985	8	23	1985	8	23	67	16100	75826.76267	0.094456986	-0.194065044	4.611869912
1985-0171-PHL	Earthquake	1985	171	7	Richter	1985	3	19	1985	3	19	2	175	16757.56308	-2.0552716	-0.194065044	4.611869912
1991-0390-COL	Earthquake	1991	390	7	Richter	1991	11	19	1991	11	19	2	867	22026.5275	-1.6903847	-0.194065044	4.611869912
1985-0227-PNG	Earthquake	1985	227	7	Richter	1985	5	11	1985	5	11	10.86991493	7291.428591	1000	-1.3672794	-0.194065044	4.611869912
1992-0215-USA	Earthquake	1992	215	7	Richter	1992	6	28	1992	6	28	1	300	100000	-1.8144653	-0.194065044	4.611869912
1999-0568-IDN	Earthquake	1999	568	7	Richter	1999	12	21	1999	12	21	5	16920	3900	-1.1686162	-0.194065044	4.611869912
2003-0628-CRI	Earthquake	2003	628	7	Richter	2003	12	25	2003	12	25	4	1210	38881.61304	-1.3262054	-0.194065044	4.611869912
1999-0601-RUS	Earthquake	1999	601	7	Richter	1999	2	21	1999	2	21	1	5020	25707.64512	-1.5107687	-0.194065044	4.611869912
1967-0020-COL	Earthquake	1967	20	7	Richter	1967	2	9	1967	2	9	61	40200	600	-0.642928	-0.194065044	4.611869912
2002-0822-IDN	Earthquake	2002	822	7	Richter	2002	11	2	2002	11	2	3	60	15196.65089	-2.170182	-0.194065044	4.611869912
2001-0123-JPN	Earthquake	2001	123	7	Richter	2001	3	24	2001	3	24	2	11261	500000	-0.6115109	-0.194065044	4.611869912
2001-0099-USA	Earthquake	2001	99	7	Richter	2001	2	28	2001	2	28	1	400	2000000	-1.2063565	-0.194065044	4.611869912
1970-0038-IRN	Earthquake	1970	38	7	Richter	1970	7	30	1970	7	30	176	10000	8000	-0.14288086	-0.194065044	4.611869912
2001-0042-SLV	Earthquake	2001	42	7	Richter	2001	2	13	2001	2	13	315	256021	348500	1.3523377	-0.194065044	4.611869912
1966-0062-TUR	Earthquake	1966	62	7	Richter	1966	8	19	1966	8	19	2394	109500	20000	1.2269362	-0.194065044	4.611869912
1970-0051-COL	Earthquake	1970	51	7	Richter	1970	9	25	1970	9	25	7.305622807	3006	400	-1.8213848	-0.194065044	4.611869912
2000-0810-TKM	Earthquake	2000	810	7	Richter	2000	12	6	2000	12	6	11	16084.34331	51885.55471	-0.48135948	-0.194065044	4.611869912
2000-0769-AZE	Earthquake	2000	769	7	Richter	2000	11	25	2000	11	25	31	3294	10000	-0.80616635	-0.194065044	4.611869912
1968-0032-GRC	Earthquake	1968	32	7	Richter	1968	2	20	1968	2	20	19	7618	600	-1.2963963	-0.194065044	4.611869912
2000-0761-IDN	Earthquake	2000	761	7	Richter	2000	10	25	2000	10	25	15.66429525	5500	46520.918	-0.61343366	-0.194065044	4.611869912
1966-0040-COD	Earthquake	1966	40	7	Richter	1966	3	20	1966	3	20	24	3600	200	-1.5806125	-0.194065044	4.611869912
2003-0245-DZA	Earthquake	2003	245	7	Richter	2003	5	21	2003	5	21	2266	210261	5000000	2.3563845	-0.194065044	4.611869912
1970-0060-PNG	Earthquake	1970	60	7	Richter	1970	11	1	1970	11	1	15	4020	1750	-1.2911317	-0.194065044	4.611869912
2003-0249-JPN	Earthquake	2003	249	7	Richter	2003	5	26	2003	5	26	14.29575155	2303	233000	-0.5135044	-0.194065044	4.611869912
2003-0254-IDN	Earthquake	2003	254	7	Richter	2003	5	27	2003	5	27	1	247	15367.16514	-2.1975129	-0.194065044	4.611869912
2000-0656-JPN	Earthquake	2000	656	7	Richter	2000	10	6	2000	10	6	22.61498609	7132	500000	-0.022340847	-0.194065044	4.611869912
2000-0653-TZA	Earthquake	2000	653	7	Richter	2000	10	2	2000	10	2	1	791	18747.92561	-1.9321203	-0.194065044	4.611869912
1970-0067-ECU	Earthquake	1970	67	7	Richter	1970	12	9	1970	12	9	29	88112	4000	-0.34753457	-0.194065044	4.611869912
1965-0024-USA	Earthquake	1965	24	7	Richter	1965	4	29	1965	4	29	7	10533.06004	28000	-0.8046613	-0.194065044	4.611869912
1970-0019-TUR	Earthquake	1970	19	7	Richter	1970	3	28	1970	3	28	1086	83448	55600	1.1405079	-0.194065044	4.611869912
1970-0010-CHN	Earthquake	1970	10	7	Richter	1970	1	4	1970	1	4	10000	2361586.002	508446.4659	2.8265297	-0.194065044	4.611869912
1969-0156-EGY	Earthquake	1969	156	7	Richter	1969	3	31	1969	3	31	2	551	20385.05406	-1.7937465	-0.194065044	4.611869912
1967-0047-TUR	Earthquake	1967	47	7	Richter	1967	7	22	1967	7	22	183	326073	3000	0.37238014	-0.194065044	4.611869912
1968-0052-PER	Earthquake	1968	52	7	Richter	1968	6	19	1968	6	19	11	420	100	-2.3489203	-0.194065044	4.611869912
2002-0378-IRN	Earthquake	2002	378	7	Richter	2002	6	22	2002	6	22	227	111300	300000	1.0692946	-0.194065044	4.611869912
1968-0068-IRN	Earthquake	1968	68	7	Richter	1968	8	31	1968	8	31	10000	79050	35000	1.6661093	-0.194065044	4.611869912
1968-0071-TUR	Earthquake	1968	71	7	Richter	1968	9	3	1968	9	3	24	20200	63543.1915	-0.18087225	-0.194065044	4.611869912
2002-0172-TWN	Earthquake	2002	172	7	Richter	2002	3	31	2002	3	31	4	500	25000	-1.5812348	-0.194065044	4.611869912
1967-0137-COL	Earthquake	1967	137	7	Richter	1967	7	29	1967	7	29	20	24920.36344	63391.4517	-0.19107026	-0.194065044	4.611869912
1968-0077-AUS	Earthquake	1968	77	7	Richter	1968	10	14	1968	10	14	10.24903658	4290	2600	-1.3120779	-0.194065044	4.611869912
1968-0099-NZL	Earthquake	1968	99	7	Richter	1968	5	24	1968	5	24	3	314	2669	-2.1651068	-0.194065044	4.611869912
2002-0070-PNG	Earthquake	2002	70	7	Richter	2002	1	10	2002	1	10	1	1000	19514.14012	-1.8786597	-0.194065044	4.611869912
2002-0584-IND	Earthquake	2002	584	7	Richter	2002	9	13	2002	9	13	2	200	17144.25394	-2.024824	-0.194065044	4.611869912
1965-0016-CHL	Earthquake	1965	16	7	Richter	1965	3	28	1965	3	28	400	20350	125000	0.7327001	-0.194065044	4.611869912
2002-0065-TUR	Earthquake	2002	65	7	Richter	2002	2	3	2002	2	3	42	252327	95000	0.54615116	-0.194065044	4.611869912
1967-0134-IDN	Earthquake	1967	134	7	Richter	1967	4	12	1967	4	12	14	10000	50323.053	-0.5129001	-0.194065044	4.611869912
1968-0143-IRN	Earthquake	1968	143	7	Richter	1968	9	1	1968	9	1	700	336810.923	208606.3713	1.5352844	-0.194065044	4.611869912
1967-0077-IND	Earthquake	1967	77	7	Richter	1967	12	11	1967	12	11	177	52272	400	-0.36776608	-0.194065044	4.611869912
1973-0147-CHN	Earthquake	1973	147	7	Richter	1973	2	6	1973	2	6	8.046050154	840	29342.259	-1.2541361	-0.194065044	4.611869912
1967-0075-ALB	Earthquake	1967	75	7	Richter	1967	11	30	1967	11	30	11	134	20000	-1.5979731	-0.194065044	4.611869912
2002-0002-VUT	Earthquake	2002	2	7	Richter	2002	1	3	2002	1	3	6.694270786	500	25836.49623	-1.4310251	-0.194065044	4.611869912
1967-0050-VEN	Earthquake	1967	50	7	Richter	1967	7	28	1967	7	28	240	81536	140000	0.88339406	-0.194065044	4.611869912
1969-0059-TUR	Earthquake	1969	59	7	Richter	1969	3	28	1969	3	28	53	350	37529.99173	-0.8532162	-0.194065044	4.611869912
2001-0749-GRC	Earthquake	2001	749	7	Richter	2001	7	26	2001	7	26	5.585353486	300	22794.098	-1.6051973	-0.194065044	4.611869912
1969-0098-PER	Earthquake	1969	98	7	Richter	1969	10	1	1969	10	1	150	3216	5000	-0.49715164	-0.194065044	4.611869912
1968-0142-MEX	Earthquake	1968	142	7	Richter	1968	8	2	1968	8	2	18	12136.39388	2400	-0.9647545	-0.194065044	4.611869912
1970-0068-PER	Earthquake	1970	68	7	Richter	1970	12	9	1970	12	9	29	15252	2000	-0.8199044	-0.194065044	4.611869912
2000-0762-IDN	Earthquake	2000	762	7	Richter	2000	6	7	2000	6	7	1	3000	23543.11854	-1.6281564	-0.194065044	4.611869912
1964-0059-TUR	Earthquake	1964	59	7	Richter	1964	10	6	1964	10	6	23	13100	5000	-0.74598515	-0.194065044	4.611869912
1961-0061-JPN	Earthquake	1961	61	7	Richter	1961	8	19	1961	8	19	10	14999.90508	50254.96853	-0.52763873	-0.194065044	4.611869912
1961-0016-ETH	Earthquake	1961	16	7	Richter	1961	6	2	1961	6	2	30	33536.56935	72614.80173	0.005809797	-0.194065044	4.611869912
2000-0480-RUS	Earthquake	2000	480	7	Richter	2000	8	4	2000	8	4	14.72436767	19108	920	-1.1083026	-0.194065044	4.611869912
1972-0027-IRN	Earthquake	1972	27	7	Richter	1972	4	10	1972	4	10	5057	23458	1000	0.5818597	-0.194065044	4.611869912
2003-0623-USA	Earthquake	2003	623	7	Richter	2003	12	22	2003	12	22	2	160	200000	-1.6163771	-0.194065044	4.611869912
2003-0630-IRN	Earthquake	2003	630	7	Richter	2003	12	26	2003	12	26	26796	267628	500000	2.671346	-0.194065044	4.611869912
2000-0111-MEX	Earthquake	2000	111	7	Richter	2000	8	9	2000	8	9	0.739316862	1	5627.004564	-3.5499709	-0.194065044	4.611869912
1959-0050-TWN	Earthquake	1959	50	7	Richter	1959	8	15	1959	8	15	16	63	21775.30129	-1.6257755	-0.194065044	4.611869912
2000-0081-COL	Earthquake	2000	81	7	Richter	2000	11	8	2000	11	8	2	430	19539.55128	-1.8502835	-0.194065044	4.611869912
2000-0076-ISL	Earthquake	2000	76	7	Richter	2000	6	21	2000	6	21	3.711331003	108	12000	-2.0385652	-0.194065044	4.611869912
1973-0017-PHL	Earthquake	1973	17	7	Richter	1973	3	17	1973	3	17	14	64	450	-2.3742957	-0.194065044	4.611869912
1973-0024-CRI	Earthquake	1973	24	7	Richter	1973	4	14	1973	4	14	21	3745	200	-1.6102296	-0.194065044	4.611869912
1999-0644-PHL	Earthquake	1999	644	7	Richter	1999	12	12	1999	12	12	6	190	1794	-2.1429648	-0.194065044	4.611869912
1999-0639-GTM	Earthquake	1999	639	7	Richter	1999	7	11	1999	7	11	2	280	18158.67186	-1.9481021	-0.194065044	4.611869912
2004-0040-IDN	Earthquake	2004	40	7	Richter	2004	2	5	2004	2	5	37	14072	1000	-0.89515555	-0.194065044	4.611869912
1959-0010-USA	Earthquake	1959	10	7	Richter	1959	8	17	1959	8	17	28	22029.53057	11000	-0.44358572	-0.194065044	4.611869912
1973-0035-MEX	Earthquake	1973	35	7	Richter	1973	8	28	1973	8	28	500	263248.6355	186368.0469	1.3719051	-0.194065044	4.611869912
1962-0006-IRN	Earthquake	1962	6	7	Richter	1962	9	1	1962	9	1	12000	103000	30000	1.740784	-0.194065044	4.611869912
1962-0030-COL	Earthquake	1962	30	7	Richter	1962	7	30	1962	7	30	47	300	35644.1888	-0.92664	-0.194065044	4.611869912
2000-0293-IDN	Earthquake	2000	293	7	Richter	2000	6	4	2000	6	4	103	204714	41000	0.6014444	-0.194065044	4.611869912
1968-0050-JPN	Earthquake	1968	50	7	Richter	1968	5	17	1968	5	17	47	2781	131000	-0.24929075	-0.194065044	4.611869912
2000-0335-ISL	Earthquake	2000	335	7	Richter	2000	6	17	2000	6	17	3.510188643	91	12000	-2.0878284	-0.194065044	4.611869912
1963-0050-TWN	Earthquake	1963	50	7	Richter	1963	2	13	1963	2	13	15	18	17343.18303	-1.9319882	-0.194065044	4.611869912
2003-0476-JPN	Earthquake	2003	476	7	Richter	2003	9	25	2003	9	25	2	773	563000	-1.1162177	-0.194065044	4.611869912
1971-0034-TUR	Earthquake	1971	34	7	Richter	1971	5	22	1971	5	22	878	88665	5000	0.6494249	-0.194065044	4.611869912
1971-0016-USA	Earthquake	1971	16	7	Richter	1971	2	9	1971	2	9	65	2000	553000	0.04182912	-0.194065044	4.611869912
1964-0014-TWN	Earthquake	1964	14	7	Richter	1964	1	18	1964	1	18	107	62485	105467.0831	0.5528087	-0.194065044	4.611869912
1964-0032-MEX	Earthquake	1964	32	7	Richter	1964	7	6	1964	7	6	45	4000	3000	-0.8853444	-0.194065044	4.611869912
2003-0497-RUS	Earthquake	2003	497	7	Richter	2003	9	27	2003	9	27	3	1805	10600	-1.5674108	-0.194065044	4.611869912
1960-0007-PER	Earthquake	1960	7	8	Richter	1960	1	13	1960	1	13	63	200	35368.14093	-0.9257559	0.254323951	5.508647902
1915-0002-ITA	Earthquake	1915	2	8	Richter	1915	1	13	1915	1	13	29980	3211194.318	60000	2.8008206	0.254323951	5.508647902
1951-0045-TWN	Earthquake	1951	45	8	Richter	1951	11	25	1951	11	25	17	250	27909.96581	-1.2921789	0.254323951	5.508647902
2016-0483-SLB	Earthquake	2016	483	8	Richter	2016	12	8	2016	12	8	19.20339597	9770	53561.054	-0.41752768	0.254323951	5.508647902
1986-0123-SLV	Earthquake	1986	123	8	Richter	1986	10	10	1986	10	10	1100	770000	1500000	2.1875563	0.254323951	5.508647902
1985-0041-CHL	Earthquake	1985	41	8	Richter	1985	3	3	1985	3	3	180	1482275	1500000	1.8095973	0.254323951	5.508647902
1906-0014-CHL	Earthquake	1906	14	8	Richter	1906	8	16	1906	8	16	20000	2713912.022	100000	2.7484858	0.254323951	5.508647902
1957-0009-MEX	Earthquake	1957	9	8	Richter	1957	7	28	1957	7	28	160	100	25000	-0.8649771	0.254323951	5.508647902
1992-0163-IDN	Earthquake	1992	163	8	Richter	1992	12	12	1992	12	12	2500	92103	100000	1.5013783	0.254323951	5.508647902
2006-0214-RUS	Earthquake	2006	214	8	Richter	2006	4	20	2006	4	20	20.61897109	12040	55000	-0.3516716	0.254323951	5.508647902
1914-0022-IDN	Earthquake	1914	22	8	Richter	1914	6	26	1914	6	26	20	20	18757.3204	-1.8163168	0.254323951	5.508647902
1957-0012-MNG	Earthquake	1957	12	8	Richter	1957	12	4	1957	12	4	1200	499829.7315	249890.9948	1.7970027	0.254323951	5.508647902
1988-0502-CHN	Earthquake	1988	502	8	Richter	1988	11	6	1988	11	6	939	1270364	269000	1.9252661	0.254323951	5.508647902
2002-0577-PNG	Earthquake	2002	577	8	Richter	2002	9	8	2002	9	8	4	4470	33715.0617	-1.0955942	0.254323951	5.508647902
1902-0012-GTM	Earthquake	1902	12	8	Richter	1902	4	18	1902	4	18	2000	444899.1064	25000	1.4932504	0.254323951	5.508647902
1953-0012-CHL	Earthquake	1953	12	8	Richter	1953	5	6	1953	5	6	12	40	500000	-1.2186073	0.254323951	5.508647902
1993-0049-GUM	Earthquake	1993	49	8	Richter	1993	8	9	1993	8	9	4.259002553	71	120000	-1.6585413	0.254323951	5.508647902
1906-0029-CHN	Earthquake	1906	29	8	Richter	1906	12	23	1906	12	23	280	10000	94373.84447	0.44145495	0.254323951	5.508647902
1909-0007-IRN	Earthquake	1909	7	8	Richter	1909	1	23	1909	1	23	5000	1421470.573	403082.113	2.4899611	0.254323951	5.508647902
1993-0097-JPN	Earthquake	1993	97	8	Richter	1993	1	15	1993	1	15	2	10522	358000	-0.6863613	0.254323951	5.508647902
1902-0014-CHN	Earthquake	1902	14	8	Richter	1902	8	22	1902	8	22	2500	855602.3747	319552.2061	2.1533928	0.254323951	5.508647902
1956-0037-GRC	Earthquake	1956	37	8	Richter	1956	7	9	1956	7	9	53	100	30298.86071	-1.1388687	0.254323951	5.508647902
2018-0055-PNG	Earthquake	2018	55	8	Richter	2018	2	26	2018	2	26	145	544300	61000	0.9625459	0.254323951	5.508647902
1990-0017-IDN	Earthquake	1990	17	8	Richter	1990	4	18	1990	4	18	5	7036	38179.05435	-0.92106634	0.254323951	5.508647902
1966-0082-PER	Earthquake	1966	82	8	Richter	1966	10	17	1966	10	17	120	108356	15000	0.33402303	0.254323951	5.508647902
2005-0558-PER	Earthquake	2005	558	8	Richter	2005	9	26	2005	9	26	5	2505	32003.49109	-1.1565523	0.254323951	5.508647902
2005-0575-AFG	Earthquake	2005	575	8	Richter	2005	10	8	2005	10	8	74648	5285752.724	6200050	4.0080676	0.254323951	5.508647902
1955-0038-CHN	Earthquake	1955	38	8	Richter	1955	4	14	1955	4	14	39	113	29009.06083	-1.2087165	0.254323951	5.508647902
1910-0023-TWN	Earthquake	1910	23	8	Richter	1910	4	12	1910	4	12	60	55716.58511	91596.07118	0.34237796	0.254323951	5.508647902
1990-0040-PHL	Earthquake	1990	40	8	Richter	1990	7	16	1990	7	16	2412	1597553	369600	2.2928889	0.254323951	5.508647902
1905-0003-IND	Earthquake	1905	3	8	Richter	1905	4	4	1905	4	4	20000	2061519.504	25000	2.4392028	0.254323951	5.508647902
1911-0020-KAZ	Earthquake	1911	20	8	Richter	1911	1	4	1911	1	4	450	243699.4789	179904.3516	1.3207457	0.254323951	5.508647902
1985-0109-MEX	Earthquake	1985	109	8	Richter	1985	9	19	1985	9	19	9500	2130204	4104000	3.1764019	0.254323951	5.508647902
1952-0022-JPN	Earthquake	1952	22	8	Richter	1952	3	4	1952	3	4	33	200	30879.27223	-1.131753	0.254323951	5.508647902
1966-0090-CHL	Earthquake	1966	90	8	Richter	1966	12	28	1966	12	28	4	3006	400	-1.9899981	0.254323951	5.508647902
2003-0039-MEX	Earthquake	2003	39	8	Richter	2003	1	22	2003	1	22	29	178603	116300	0.41179544	0.254323951	5.508647902
1905-0009-JPN	Earthquake	1905	9	8	Richter	1905	6	2	1905	6	2	11	177	24013.49044	-1.509596	0.254323951	5.508647902
2017-0382-GTM	Earthquake	2017	382	8	Richter	2017	9	8	2017	9	8	111.4802609	1203851	2341930.958	1.7166123	0.254323951	5.508647902
2019-0271-PNG	Earthquake	2019	271	8	Richter	2019	5	14	2019	5	14	7.350833807	651	27564.07401	-1.3410447	0.254323951	5.508647902
2005-0321-CHL	Earthquake	2005	321	8	Richter	2005	6	13	2005	6	13	16.38699857	30167.02016	5050	-0.6750895	0.254323951	5.508647902
1952-0004-USA	Earthquake	1952	4	8	Richter	1952	7	21	1952	7	21	12	200	60000	-1.2926257	0.254323951	5.508647902
2019-0243-ECU	Earthquake	2019	243	8	Richter	2019	5	26	2019	5	26	3.931048798	4287	39857.93325	-1.0778615	0.254323951	5.508647902
1911-0024-JPN	Earthquake	1911	24	8	Richter	1911	6	15	1911	6	15	12	1266	34226.99343	-1.0332583	0.254323951	5.508647902
2004-0562-IDN	Earthquake	2004	562	8	Richter	2004	11	11	2004	11	11	33	83381	86554.87867	0.24384807	0.254323951	5.508647902
1912-0006-TUR	Earthquake	1912	6	8	Richter	1912	8	9	1912	8	9	923	18195	134276.6044	0.9579426	0.254323951	5.508647902
1992-0081-KGZ	Earthquake	1992	81	8	Richter	1992	8	19	1992	8	19	54	86806	130000	0.4645078	0.254323951	5.508647902
1913-0027-IDN	Earthquake	1913	27	8	Richter	1913	3	14	1913	3	14	138	102542.4575	121077.5566	0.74681014	0.254323951	5.508647902
1906-0013-USA	Earthquake	1906	13	8	Richter	1906	4	18	1906	4	18	700	84564	524000	1.4332106	0.254323951	5.508647902
1965-0093-IDN	Earthquake	1965	93	8	Richter	1965	1	24	1965	1	24	71	15000	75832.88887	0.096793264	0.254323951	5.508647902
2019-0475-ECU	Earthquake	2019	475	8	Richter	2019	2	22	2019	2	22	5.228308766	249	21775.85939	-1.6687288	0.254323951	5.508647902
1911-0023-MEX	Earthquake	1911	23	8	Richter	1911	6	7	1911	6	7	45	22	22602.95886	-1.5362451	0.254323951	5.508647902
1956-0008-AFG	Earthquake	1956	8	8	Richter	1956	6	10	1956	6	10	100	2000	25000	-0.40769446	0.254323951	5.508647902
1935-0005-PAK	Earthquake	1935	5	8	Richter	1935	5	31	1935	5	31	60000	25000	340495.304	2.360258	0.254323951	5.508647902
1949-0015-CHL	Earthquake	1949	15	8	Richter	1949	12	17	1949	12	17	6	18	5200	-2.4102566	0.254323951	5.508647902
1971-0042-CHL	Earthquake	1971	42	8	Richter	1971	7	9	1971	7	9	85	2348973	236400	1.3498751	0.254323951	5.508647902
1978-0080-JPN	Earthquake	1978	80	8	Richter	1978	6	12	1978	6	12	28	2500	865000	-0.06768991	0.254323951	5.508647902
1936-0028-IDN	Earthquake	1936	28	8	Richter	1936	4	1	1936	4	1	8.062997877	845	29385.00117	-1.2521126	0.254323951	5.508647902
2009-0406-BTN	Earthquake	2009	406	8	Richter	2009	9	21	2009	9	21	11	12	15162.51137	-2.123248	0.254323951	5.508647902
1978-0115-IRN	Earthquake	1978	115	8	Richter	1978	9	16	1978	9	16	25000	40000	50000	1.8543735	0.254323951	5.508647902
1978-0135-MEX	Earthquake	1978	135	8	Richter	1978	11	29	1978	11	29	9	3850	38964.3821	-0.8713014	0.254323951	5.508647902
1998-0403-IDN	Earthquake	1998	403	8	Richter	1998	11	29	1998	11	29	33	6448	200000	-0.105079405	0.254323951	5.508647902
1943-0010-CHL	Earthquake	1943	10	8	Richter	1943	4	6	1943	4	6	12	35	100000	-1.5411772	0.254323951	5.508647902
2009-0479-IDN	Earthquake	2009	479	8	Richter	2009	11	8	2009	11	8	2	1510	2430	-1.9871833	0.254323951	5.508647902
1979-0032-MEX	Earthquake	1979	32	8	Richter	1979	3	14	1979	3	14	5	7535	30000	-0.95198655	0.254323951	5.508647902
1933-0021-CHN	Earthquake	1933	21	8	Richter	1933	8	25	1933	8	25	10000	2361586.002	508446.4659	2.8265297	0.254323951	5.508647902
1943-0014-TUR	Earthquake	1943	14	8	Richter	1943	11	27	1943	11	27	4020	5000	40000	0.8929579	0.254323951	5.508647902
1979-0086-IDN	Earthquake	1979	86	8	Richter	1979	9	12	1979	9	12	2	5005	29718.4453	-1.290634	0.254323951	5.508647902
2012-0431-PHL	Earthquake	2012	431	8	Richter	2012	8	31	2012	8	31	1	28879	3244	-1.5479621	0.254323951	5.508647902
1932-0017-MEX	Earthquake	1932	17	8	Richter	1932	6	3	1932	6	3	400	120	47774.92248	-0.45340815	0.254323951	5.508647902
1931-0020-CHN	Earthquake	1931	20	8	Richter	1931	8	11	1931	8	11	10000	2361586.002	508446.4659	2.8265297	0.254323951	5.508647902
1979-0107-IRN	Earthquake	1979	107	8	Richter	1979	11	27	1979	11	27	16	23	18331.56472	-1.8555357	0.254323951	5.508647902
1979-0113-COL	Earthquake	1979	113	8	Richter	1979	12	12	1979	12	12	579	11042	8000	0.20994356	0.254323951	5.508647902
2012-0343-CRI	Earthquake	2012	343	8	Richter	2012	9	5	2012	9	5	2	762	45000	-1.5842246	0.254323951	5.508647902
1918-0008-PRI	Earthquake	1918	8	8	Richter	1918	10	11	1918	10	11	116	68798.73609	29000	0.35662448	0.254323951	5.508647902
1977-0106-IDN	Earthquake	1977	106	8	Richter	1977	8	19	1977	8	19	185	3975	1200	-0.6595508	0.254323951	5.508647902
1977-0048-BGR	Earthquake	1977	48	8	Richter	1977	3	4	1977	3	4	1661	386465	2026899.479	2.2228427	0.254323951	5.508647902
1999-0524-VUT	Earthquake	1999	524	8	Richter	1999	11	27	1999	11	27	12	14100	51666.43645	-0.4836634	0.254323951	5.508647902
1973-0150-JPN	Earthquake	1973	150	8	Richter	1973	6	17	1973	6	17	2.130083175	27	5000	-2.6276693	0.254323951	5.508647902
1940-0009-PER	Earthquake	1940	9	8	Richter	1940	5	24	1940	5	24	179	3500	71807.99917	0.059546582	0.254323951	5.508647902
1973-0014-MEX	Earthquake	1973	14	8	Richter	1973	1	30	1973	1	30	56	390	38674.68609	-0.81100106	0.254323951	5.508647902
1976-0024-GTM	Earthquake	1976	24	8	Richter	1976	2	4	1976	2	4	23000	4993000	1000000	3.3313844	0.254323951	5.508647902
1939-0010-TUR	Earthquake	1939	10	8	Richter	1939	12	27	1939	12	27	32962	2750818.454	20000	2.5946755	0.254323951	5.508647902
1999-0360-MEX	Earthquake	1999	360	8	Richter	1999	9	30	1999	9	30	31	115215	164800	0.40847334	0.254323951	5.508647902
1999-0321-TWN	Earthquake	1999	321	8	Richter	1999	9	21	1999	9	21	2264	108664	14100000	2.417268	0.254323951	5.508647902
1977-0059-SLB	Earthquake	1977	59	8	Richter	1977	4	21	1977	4	21	34	1001	40914.68517	-0.75503373	0.254323951	5.508647902
1999-0268-TUR	Earthquake	1999	268	8	Richter	1999	8	17	1999	8	17	17127	1358953	20000000	3.5446215	0.254323951	5.508647902
1976-0050-CHN	Earthquake	1976	50	8	Richter	1976	7	27	1976	7	27	242000	164000	5600000	3.6359196	0.254323951	5.508647902
1938-0009-IDN	Earthquake	1938	9	8	Richter	1938	5	20	1938	5	20	15.79457205	5630	46788.23387	-0.6054684	0.254323951	5.508647902
2000-0230-IDN	Earthquake	2000	230	8	Richter	2000	5	4	2000	5	4	45	52770	30000	0.045659907	0.254323951	5.508647902
1937-0024-PHL	Earthquake	1937	24	8	Richter	1937	8	20	1937	8	20	1	200	14822.88578	-2.2456408	0.254323951	5.508647902
1976-0054-PHL	Earthquake	1976	54	8	Richter	1976	8	16	1976	8	16	6000	181348	134000	1.9335029	0.254323951	5.508647902
1937-0022-MEX	Earthquake	1937	22	8	Richter	1937	7	25	1937	7	25	34	36756.03433	75724.45771	0.066584505	0.254323951	5.508647902
1942-0039-PER	Earthquake	1942	39	8	Richter	1942	8	24	1942	8	24	30	25	21217.2408	-1.6362664	0.254323951	5.508647902
1976-0075-TUR	Earthquake	1976	75	8	Richter	1976	11	24	1976	11	24	3840	216000	25000	1.5338228	0.254323951	5.508647902
1939-0001-CHL	Earthquake	1939	1	8	Richter	1939	1	24	1939	1	24	30000	58500	920000	2.5163422	0.254323951	5.508647902
2013-0099-IRN	Earthquake	2013	99	8	Richter	2013	4	16	2013	4	16	43.37845873	15202	80339.6216	-0.0278726	0.254323951	5.508647902
2009-0001-IDN	Earthquake	2009	1	8	Richter	2009	1	3	2009	1	3	5	4250	10000	-1.2668177	0.254323951	5.508647902
2000-0749-PNG	Earthquake	2000	749	8	Richter	2000	11	16	2000	11	16	2	5000	29713.37056	-1.290862	0.254323951	5.508647902
2007-0587-CHL	Earthquake	2007	587	8	Richter	2007	11	14	2007	11	14	2	25155	100000	-0.7498541	0.254323951	5.508647902
1969-0155-MAR	Earthquake	1969	155	8	Richter	1969	2	28	2019	2	28	13	16164.34331	66545.48423	-0.38780496	0.254323951	5.508647902
2007-0440-IDN	Earthquake	2007	440	8	Richter	2007	9	12	2007	9	12	25	459567	500000	0.8245448	0.254323951	5.508647902
2007-0362-PER	Earthquake	2007	362	8	Richter	2007	8	15	2007	8	15	593	658331	600000	1.8150966	0.254323951	5.508647902
1994-0343-JPN	Earthquake	1994	343	8	Richter	1994	10	4	1994	10	4	5	1500	29318.85496	-1.2734853	0.254323951	5.508647902
1994-0342-RUS	Earthquake	1994	342	8	Richter	1994	10	4	1994	10	4	11	2342	37331.82318	-0.9207141	0.254323951	5.508647902
1994-0316-JPN	Earthquake	1994	316	8	Richter	1994	12	28	1994	12	28	2	285	170400	-1.532388	0.254323951	5.508647902
1948-0014-PHL	Earthquake	1948	14	8	Richter	1948	1	25	1948	1	25	72	32924.19429	3500	-0.31105962	0.254323951	5.508647902
1923-0006-JPN	Earthquake	1923	6	8	Richter	1923	9	1	1923	9	1	143000	203733	600000	3.120056	0.254323951	5.508647902
1922-0014-TWN	Earthquake	1922	14	8	Richter	1922	9	2	1922	9	2	5	417	23559.38403	-1.565379	0.254323951	5.508647902
2015-0144-BGD	Earthquake	2015	144	8	Richter	2015	4	25	2015	4	25	8942	5848365	5336401.366	3.4063213	0.254323951	5.508647902
1994-0058-BOL	Earthquake	1994	58	8	Richter	1994	6	9	1994	6	9	5	9028.646293	39840.73194	-0.8642071	0.254323951	5.508647902
1920-0017-MEX	Earthquake	1920	17	8	Richter	1920	1	3	1920	1	3	648	167	55937.03452	-0.22436033	0.254323951	5.508647902
2015-0476-AFG	Earthquake	2015	476	8	Richter	2015	10	26	2015	10	26	396.6724882	595325	308731.4234	1.5604318	0.254323951	5.508647902
2002-0129-PHL	Earthquake	2002	129	8	Richter	2002	3	5	2002	3	5	15	73451	1714	-0.7238784	0.254323951	5.508647902
1918-0011-PHL	Earthquake	1918	11	8	Richter	1918	8	15	1918	8	15	100	80995.37765	108692.8731	0.59041727	0.254323951	5.508647902
2016-0117-ECU	Earthquake	2016	117	8	Richter	2016	4	16	2016	4	16	672	389364	2000000	1.9685421	0.254323951	5.508647902
1947-0028-GRC	Earthquake	1947	28	8	Richter	1947	10	6	1947	10	6	3	35020	45116.751	-0.71785927	0.254323951	5.508647902
1995-0097-RUS	Earthquake	1995	97	8	Richter	1995	5	27	1995	5	27	1989	750	64100	0.40990803	0.254323951	5.508647902
1947-0013-PER	Earthquake	1947	13	8	Richter	1947	11	1	1947	11	1	233	150487.8177	144302.3542	1.001142	0.254323951	5.508647902
1995-0171-CHL	Earthquake	1995	171	8	Richter	1995	7	30	1995	7	30	3	1833	1660	-1.9057422	0.254323951	5.508647902
1944-0003-TUR	Earthquake	1944	3	8	Richter	1944	2	1	1944	2	1	3959	1198082.584	372758.446	2.3766074	0.254323951	5.508647902
1945-0007-PAK	Earthquake	1945	7	8	Richter	1945	11	28	1945	11	28	4000	705870.6697	25000	1.7780101	0.254323951	5.508647902
2001-0013-SLV	Earthquake	2001	13	8	Richter	2001	1	13	2001	1	13	844	1334529	1500000	2.2214985	0.254323951	5.508647902
2001-0023-GTM	Earthquake	2001	23	8	Richter	2001	1	13	2001	1	13	6	152	50	-2.8459938	0.254323951	5.508647902
2013-0381-PAK	Earthquake	2013	381	8	Richter	2013	9	24	2013	9	24	399	185749	100000	1.1255769	0.254323951	5.508647902
2001-0033-IND	Earthquake	2001	33	8	Richter	2001	1	26	2001	1	26	20017	7236104	2623500	3.5430143	0.254323951	5.508647902
1946-0013-CHL	Earthquake	1946	13	8	Richter	1946	8	2	1946	8	2	2	4615.115729	29309.51355	-1.3091265	0.254323951	5.508647902
1996-0061-IDN	Earthquake	1996	61	8	Richter	1996	2	17	1996	2	17	166	25638	4200	-0.09282998	0.254323951	5.508647902
1929-0013-NZL	Earthquake	1929	13	8	Richter	1929	6	17	1929	6	17	17	22123.95594	60032.23032	-0.26998383	0.254323951	5.508647902
1930-0006-MMR	Earthquake	1930	6	8	Richter	1930	5	5	1930	5	5	500	263248.6355	186368.0469	1.3719051	0.254323951	5.508647902
1995-0253-MEX	Earthquake	1995	253	8	Richter	1995	10	9	1995	10	9	58	44465	87508.30253	0.28014264	0.254323951	5.508647902
2008-0192-CHN	Earthquake	2008	192	8	Richter	2008	5	12	2008	5	12	87476	45976596	85000000	4.9596786	0.254323951	5.508647902
1927-0006-CHN	Earthquake	1927	6	8	Richter	1927	5	23	1927	5	23	40912	133894	418525.0406	2.6209245	0.254323951	5.508647902
1946-0021-DOM	Earthquake	1946	21	8	Richter	1946	8	4	1946	8	4	73	64322.33254	97816.29784	0.43760473	0.254323951	5.508647902
2014-0094-CHL	Earthquake	2014	94	8	Richter	2014	4	1	2014	4	1	6	513387	100000	0.15050358	0.254323951	5.508647902
1970-0032-PER	Earthquake	1970	32	8	Richter	1970	5	31	1970	5	31	66794	3216240	530000	3.4264748	0.254323951	5.508647902
1946-0015-JPN	Earthquake	1946	15	8	Richter	1946	12	21	1946	12	21	2000	726604.0764	296534.2271	2.045042	0.254323951	5.508647902
2012-0097-IDN	Earthquake	2012	97	9	Richter	2012	4	11	2012	4	11	7	107	20040.47432	-1.768352	0.702712946	6.405425891
1906-0002-COL	Earthquake	1906	2	9	Richter	1906	1	31	1906	1	31	400	223558.907	172943.587	1.2635543	0.702712946	6.405425891
1920-0007-CHN	Earthquake	1920	7	9	Richter	1920	12	16	1920	12	16	180000	8905168.871	25000	3.341871	0.702712946	6.405425891
1950-0008-IND	Earthquake	1950	8	9	Richter	1950	8	15	1950	8	15	1500	351431.8839	20000	1.3252809	0.702712946	6.405425891
2005-0160-IDN	Earthquake	2005	160	9	Richter	2005	3	28	2005	3	28	915	105313	180918.2875	1.3555214	0.702712946	6.405425891
1922-0001-CHL	Earthquake	1922	1	9	Richter	1922	11	11	1922	11	11	1000	437352.9106	235084.0479	1.7084736	0.702712946	6.405425891
2020-0020-ESP	Extra-tropical_storm	2020	20	100	km/h	2020	1	19	2020	1	21	17	22123.95594	60032.23032	-0.26998383	-1.738237786	1.523524429
2002-0678-POL	Extra-tropical_storm	2002	678	100	km/h	2002	10	27	2002	10	27	3	1707.863496	50	-2.5645156	-1.738237786	1.523524429
2011-0518-CHE	Extra-tropical_storm	2011	518	120	km/h	2011	12	16	2011	12	16	1.09140399	3	7367.110815	-3.175386	-1.322050591	2.355898818
2014-0067-GBR	Extra-tropical_storm	2014	67	130	km/h	2014	2	14	2014	2	15	5	18000	100000	-0.559147	-1.139336014	2.721327972
2018-0025-BEL	Extra-tropical_storm	2018	25	130	km/h	2018	1	17	2018	1	18	9	10649.02682	721721.7632	-0.1338875	-1.139336014	2.721327972
2002-0672-BEL	Extra-tropical_storm	2002	672	140	km/h	2002	10	26	2002	10	28	5	5982.101817	5000	-1.3272415	-0.970169758	3.059660484
2013-0530-FRA	Extra-tropical_storm	2013	530	150	km/h	2013	12	23	2013	12	25	6	11806.54744	63076.49516	-0.6758489	-0.812678548	3.374642903
1998-0436-FRA	Extra-tropical_storm	1998	436	150	km/h	1998	1	1	1998	1	6	6	690	150000	-1.074534	-0.812678548	3.374642903
2002-0671-GBR	Extra-tropical_storm	2002	671	155	km/h	2002	10	26	2002	10	28	7	17848.82496	400000	-0.21137907	-0.737829161	3.524341678
2010-0088-DEU	Extra-tropical_storm	2010	88	160	km/h	2010	2	28	2010	2	28	63	534046.7327	5840000	1.5653261	-0.665355927	3.669288146
2019-0533-FRA	Extra-tropical_storm	2019	533	163	km/h	2019	10	28	2019	11	3	1	54	11851.76971	-2.5441923	-0.622951977	3.754096045
2003-0003-CHE	Extra-tropical_storm	2003	3	163	km/h	2003	1	2	2003	1	3	1.372977284	7	5000	-3.015952	-0.622951977	3.754096045
2009-0014-FRA	Extra-tropical_storm	2009	14	171	km/h	2009	1	23	2009	1	26	11	36428.3755	3200000	0.43823093	-0.513579242	3.972841516
2008-0600-USA	Extra-tropical_storm	2008	600	175	km/h	2008	1	4	2008	1	9	12	30649.00016	1000000	0.21447767	-0.460797716	4.078404569
1999-0590-DNK	Extra-tropical_storm	1999	590	177	km/h	1999	12	3	1999	12	5	7	25882.16394	2604939	0.20664439	-0.434857039	4.130285921
2002-0674-DEU	Extra-tropical_storm	2002	674	180	km/h	2002	10	26	2002	10	26	11	32499.81325	1800000	0.3098669	-0.396491354	4.207017292
2005-0011-DEU	Extra-tropical_storm	2005	11	181	km/h	2005	1	8	2005	1	8	9	18536.15543	2220000	0.18193479	-0.383845383	4.232309234
1998-0007-GBR	Extra-tropical_storm	1998	7	185	km/h	1998	1	1	1998	1	6	15	3000	500000	-0.30748704	-0.333947243	4.332105515
2017-0086-FRA	Extra-tropical_storm	2017	86	193	km/h	2017	3	6	2017	3	7	2	11	100000	-2.2702491	-0.237310822	4.525378357
2013-0398-DEU	Extra-tropical_storm	2013	398	195	km/h	2013	10	27	2013	10	28	9	5557.802293	56625.23221	-0.73031384	-0.213776777	4.572446447
2019-0626-FRA	Extra-tropical_storm	2019	626	206	km/h	2019	12	19	2019	12	22	1.208593994	4	7905.694591	-3.077297	-0.088510043	4.822979913
1999-0571-CHE	Extra-tropical_storm	1999	571	210	km/h	1999	12	25	1999	12	27	115	3472259.783	11100000	2.220007	-0.044610521	4.910778958
2007-0019-BEL	Extra-tropical_storm	2007	19	216	km/h	2007	1	18	2007	1	18	43	75019.63507	7950000	1.1294016	0.019695841	5.039391682
2008-0082-AUT	Extra-tropical_storm	2008	82	220	km/h	2008	2	29	2008	3	2	11	35722.2084	1750000	0.32326284	0.061581673	5.123163347
1995-0079-IDN	Flash_flood	1995	79	10	km^2	1995	5	7	1995	5	7	27	2200	44595.6764	-0.6489174	-0.865965349	3.268069301
1998-0112-TZA	Flash_flood	1998	112	12	km^2	1998	4	27	1998	5	4	5	4600	35505.2316	-1.0179703	-0.853177994	3.293644013
1998-0213-KGZ	Flash_flood	1998	213	12	km^2	1998	5	18	1998	5	22	1	7728	2400	-1.8625647	-0.853177994	3.293644013
1993-0011-COL	Flash_flood	1993	11	20	km^2	1993	4	26	1993	5	1	63	80283	98497.99921	0.44121158	-0.817350582	3.365298836
2002-0466-ROU	Flash_flood	2002	466	40	km^2	2002	8		2002	8		4	3900	32938.3999	-1.1266986	-0.768735815	3.462528371
1999-0431-ETH	Flash_flood	1999	431	40	km^2	1999	10	30	1999	11	2	34	79000	86299.4925	0.24105158	-0.768735815	3.462528371
1999-0229-TJK	Flash_flood	1999	229	45	km^2	1999	7	7	1999	7	12	27	9392	6154	-0.72827375	-0.760474948	3.479050105
1999-0053-PHL	Flash_flood	1999	53	58	km^2	1999	2	20	1999	2	22	34	3703	6000	-0.85135394	-0.742675736	3.514648528
2003-0710-MEX	Flash_flood	2003	710	60	km^2	2003	6	12	2003	6	15	7.908069339	800	28993.23156	-1.2707717	-0.740297997	3.519404005
1996-0107-NPL	Flash_flood	1996	107	60	km^2	1996	7	12	1996	7	12	768	151382	185541.7676	1.3824694	-0.740297997	3.519404005
2001-0536-ITA	Flash_flood	2001	536	69	km^2	2001	9	14	2001	9	15	2	5886.976934	100000	-1.0353246	-0.730495615	3.539008769
1998-0226-LKA	Flash_flood	1998	226	75	km^2	1998	7	17	1998	7	20	1	135000	45113.83626	-0.76016825	-0.724647536	3.550704928
2004-0476-PAN	Flash_flood	2004	476	80	km^2	2004	9	17	2004	9	19	16	11650	53121.57962	-0.43553755	-0.720121047	3.559757906
2001-0109-TZA	Flash_flood	2001	109	108	km^2	2001	2	27	2001	2	27	5	200	20780.00945	-1.7329197	-0.699072824	3.601854351
2004-0247-CHN	Flash_flood	2004	247	114	km^2	2004	5	27	2004	5	28	18	23069.74929	61192.88465	-0.24222986	-0.695280756	3.609438487
1999-0259-KHM	Flash_flood	1999	259	120	km^2	1999	8	2	1999	8	8	7	535904	500	-0.7734114	-0.69168323	3.61663354
2004-0317-BRA	Flash_flood	2004	317	150	km^2	2004	6	17	2004	6	18	7	3000	35420.04188	-1.0082448	-0.676032769	3.647934463
2003-0439-HTI	Flash_flood	2003	439	160	km^2	2003	8	29	2003	8	30	24	12070	58191.58469	-0.29829234	-0.67150628	3.656987441
2000-0617-BGD	Flash_flood	2000	617	162	km^2	2000	9		2000	10		31	2467138	500000	1.2150892	-0.670635007	3.658729986
1999-0269-THA	Flash_flood	1999	269	162	km^2	1999	7	24	1999	8	5	7	90700	13000	-0.522718	-0.670635007	3.658729986
2003-0287-ASM	Flash_flood	2003	287	174	km^2	2003	5	18	2003	5	19	6	3	50000	-2.3457286	-0.665623151	3.668753697
2001-0596-PHL	Flash_flood	2001	596	190	km^2	2001	10	10	2001	10	10	4	300	21251.47295	-1.7115535	-0.659453345	3.68109331
2003-0047-BOL	Flash_flood	2003	47	210	km^2	2003	1	21	2003	1	22	4	6025	35479.22664	-1.0275242	-0.652433871	3.695132259
2003-0663-USA	Flash_flood	2003	663	250	km^2	2003	11	12	2003	11	13	18	23069.74929	61192.88465	-0.24222986	-0.640205357	3.719589286
2007-0142-THA	Flash_flood	2007	142	290	km^2	2007	4	14	2007	4	15	38	39875.45296	78599.41344	0.120591916	-0.62979574	3.74040852
1988-0363-CHN	Flash_flood	1988	363	300	km^2	1988	8	6	1988	8	6	204	30000	106536.7068	0.5910766	-0.627418001	3.745163998
2007-0559-SOM	Flash_flood	2007	559	310	km^2	2007	11	3	2007	11	4	21	2012	41663.4774	-0.7493474	-0.625118253	3.749763494
1999-0547-VEN	Flash_flood	1999	547	350	km^2	1999	12	15	1999	12	20	30000	483635	3160000	3.1587322	-0.616606459	3.766787082
2004-0158-DJI	Flash_flood	2004	158	370	km^2	2004	4	12	2004	4	16	51	100000	97827.20796	0.42397016	-0.612708977	3.774582046
1993-0052-NPL	Flash_flood	1993	52	373	km^2	1993	8	23	1993	8	23	1048	553268	200000	1.7380519	-0.61214261	3.775714781
1996-0464-EGY	Flash_flood	1996	464	400	km^2	1996	11	13	1996	11	18	12	260	26116.70992	-1.3941963	-0.607241051	3.785517898
2008-0067-IDN	Flash_flood	2008	67	400	km^2	2008	2	8	2008	2	12	14	7000	47348.09398	-0.5942285	-0.607241051	3.785517898
2002-0475-TJK	Flash_flood	2002	475	400	km^2	2002	8	7	2002	8	8	24	1713	2836	-1.2383533	-0.607241051	3.785517898
2003-0220-NAM	Flash_flood	2003	220	400	km^2	2003	5	12	2003	5	12	2	12000	34507.20073	-1.0912392	-0.607241051	3.785517898
1999-0247-KOR	Flash_flood	1999	247	440	km^2	1999	7	30	1999	8	8	64	30208	332000	0.47720847	-0.600556347	3.798887306
1993-0236-NLD	Flash_flood	1993	236	460	km^2	1993	12	21	1993	12	31	1	13000	53000	-1.1905272	-0.597438669	3.805122662
1999-0244-VNM	Flash_flood	1999	244	500	km^2	1999	7	24	1999	8	5	40	115175	19500	0.086794645	-0.59159059	3.816818821
2006-0366-VNM	Flash_flood	2006	366	560	km^2	2006	7	9	2006	7	11	4	100	1000	-2.4902353	-0.583642153	3.832715695
2000-0791-IDN	Flash_flood	2000	791	590	km^2	2000	12	3	2000	12	6	38	39852	78591.51352	0.12045782	-0.57998202	3.840035961
2003-0531-IDN	Flash_flood	2003	531	600	km^2	2003	11	2	2003	11	3	241	1498	66117.67975	-0.03921025	-0.578803234	3.842393533
2005-0302-NZL	Flash_flood	2005	302	630	km^2	2005	5	18	2005	5	21	7.0333289	400	72000	-1.2723601	-0.575381286	3.849237428
2006-0137-PHL	Flash_flood	2006	137	630	km^2	2006	3	4	2006	3	6	1	1000	19514.14012	-1.8786597	-0.575381286	3.849237428
1988-0698-FRA	Flash_flood	1988	698	710	km^2	1988	10	3	1988	10	3	10	300	500000	-0.8735893	-0.566996812	3.866006377
2001-0664-ZAF	Flash_flood	2001	664	752	km^2	2001	12	19	2001	12	22	5	312	22420.24891	-1.6315233	-0.56296599	3.87406802
1998-0219-KOR	Flash_flood	1998	219	804	km^2	1998	7	31	1998	8	10	403	121000	1480000	1.5402446	-0.558276497	3.883447006
1998-0085-IRN	Flash_flood	1998	85	850	km^2	1998	3	28	1998	4	4	84	56002	98000	0.45001197	-0.554374299	3.891251402
2002-0711-KEN	Flash_flood	2002	711	920	km^2	2002	11	17	2002	11	20	12	2000	37008.22521	-0.9289892	-0.548823901	3.902352197
1999-0081-THA	Flash_flood	1999	81	960	km^2	1999	2		1999	2		3	20000	40998.99378	-0.84559214	-0.545838927	3.908322145
2002-0402-BGD	Flash_flood	2002	402	1000	km^2	2002	7		2002	8		10	1500000	110375.5072	0.52242506	-0.542975822	3.914048356
2002-0510-MEX	Flash_flood	2002	510	1000	km^2	2002	8	15	2002	8	17	27	7000	54346.69618	-0.3849972	-0.542975822	3.914048356
2001-0299-CMR	Flash_flood	2001	299	1080	km^2	2001	6	28	2001	6	29	30	1500	42705.12966	-0.7026817	-0.537578061	3.924843879
1993-0493-TTO	Flash_flood	1993	493	1170	km^2	1993	10	5	1993	10	5	5	10	70	-3.369985	-0.531964153	3.936071693
1997-0164-BGD	Flash_flood	1997	164	1200	km^2	1997	7	13	1997	7	13	79	900030	229000	1.1349645	-0.530188466	3.939623068
1981-0034-SOM	Flash_flood	1981	34	1205	km^2	1981	4		1981	4		5	30000	48912.9197	-0.59040415	-0.529896838	3.940206324
1999-0248-PRK	Flash_flood	1999	248	1400	km^2	1999	7	30	1999	8	8	42	42135	2000	-0.5164866	-0.519376924	3.961246152
2003-0337-AFG	Flash_flood	2003	337	1440	km^2	2003	7	12	2003	7	15	33	250	32079.22114	-1.080872	-0.51740111	3.965197779
1995-0156-PAK	Flash_flood	1995	156	1450	km^2	1995	7	22	1995	7	29	451	1255000	238150.1142	1.6951642	-0.516915744	3.966168513
2005-0506-MYS	Flash_flood	2005	506	1470	km^2	2005	7	17	2005	7	19	4	600	23923.18428	-1.5535034	-0.515954943	3.968090114
2004-0541-CAF	Flash_flood	2004	541	1516	km^2	2004	10	24	2004	11	2	3	12698	37937.26977	-0.9491778	-0.513793852	3.972412297
2007-0585-MWI	Flash_flood	2007	585	1630	km^2	2007	11	18	2008	2		53.97665921	180246	109482.4413	0.5763788	-0.508708654	3.982582692
1999-0265-TCD	Flash_flood	1999	265	1650	km^2	1999	8	1	1999	8	23	53.25226468	173506	108463.8701	0.56338483	-0.507853301	3.984293398
2006-0392-CHN	Flash_flood	2006	392	1666	km^2	2006	7	20	2006	7	21	35	37544.69427	76463.43578	0.08065987	-0.50717647	3.985647061
2005-0415-TUR	Flash_flood	2005	415	1670	km^2	2005	8	2	2005	8	3	7	11551.61426	44594.71813	-0.70082766	-0.507008282	3.985983436
2013-0079-MUS	Flash_flood	2013	79	1680	km^2	2013	3	30	2013	4	3	11	82	2000	-2.1184509	-0.506589568	3.986820864
2005-0223-IDN	Flash_flood	2005	223	1730	km^2	2005	4	26	2005	4	27	47	768	41853.82664	-0.71230125	-0.50453262	3.990934759
2001-0541-RWA	Flash_flood	2001	541	1770	km^2	2001	9	22	2001	9	22	10	14999.90508	50254.96853	-0.52763873	-0.502929435	3.99414113
2003-0417-CAN	Flash_flood	2003	417	1990	km^2	2003	8	4	2003	8	5	5.560340562	400	10000	-1.7016021	-0.494712614	4.010574773
2005-0729-CHN	Flash_flood	2005	729	2020	km^2	2005	5	28	2005	5	29	8	8842	4600	-1.134222	-0.493663187	4.012673626
2004-0311-PHL	Flash_flood	2004	311	2080	km^2	2004	6	28	2004	6	30	15	1500	36922.7636	-0.9234987	-0.491610253	4.016779495
2001-0186-ECU	Flash_flood	2001	186	2130	km^2	2001	3	8	2001	3	10	11	1200	33301.54479	-1.073186	-0.489944227	4.020111546
2001-0180-IRN	Flash_flood	2001	180	2130	km^2	2001	5	6	2001	5	6	32	1300	42242.0989	-0.7147511	-0.489944227	4.020111546
1996-0016-FRA	Flash_flood	1996	16	2140	km^2	1996	1	27	1996	1	30	4	600	6000	-1.8081517	-0.489615744	4.020768512
2001-0403-KOR	Flash_flood	2001	403	2230	km^2	2001	7	29	2001	7	30	8	15000	47955.47187	-0.59872437	-0.486726419	4.026547162
2001-0335-KOR	Flash_flood	2001	335	2230	km^2	2001	7	14	2001	7	15	62	295000	76000	0.64480084	-0.486726419	4.026547162
2005-0307-CHN	Flash_flood	2005	307	2330	km^2	2005	6	10	2005	6	12	117	425	45000	-0.55996305	-0.483649776	4.032700448
2003-0728-MWI	Flash_flood	2003	728	2420	km^2	2003	4	5	2003	4	8	4	1000	26104.8439	-1.4370259	-0.480991647	4.038016707
2005-0589-IDN	Flash_flood	2005	589	2460	km^2	2005	10	18	2005	10	19	28	12211	60224.60757	-0.24653603	-0.479841856	4.040316288
2017-0444-GRC	Flash_flood	2017	444	2571	km^2	2017	11	11	2017	11	20	23	6024	51217.12775	-0.47031677	-0.476746485	4.04650703
2005-0371-PRK	Flash_flood	2005	371	2590	km^2	2005	6	30	2005	7	2	193	16298	94879.91536	0.4342917	-0.476230082	4.047539835
2006-0649-MWI	Flash_flood	2006	649	2760	km^2	2006	11	27	2006	11	29	5	8000	39025.84182	-0.89178836	-0.471771317	4.056457367
2010-0067-DOM	Flash_flood	2010	67	2791	km^2	2010	2	14	2010	2	15	1	25700	33980.65481	-1.138401	-0.470987934	4.058024132
2015-0451-FRA	Flash_flood	2015	451	2896	km^2	2015	10	3	2015	10	4	20	42397.74343	924000	0.40670133	-0.468397795	4.06320441
1991-0048-MWI	Flash_flood	1991	48	3060	km^2	1991	3	10	1991	3	15	472	150000	24000	0.8678375	-0.464534392	4.070931216
2011-0469-PHL	Flash_flood	2011	469	3076	km^2	2011	11	9	2011	11	14	21.27475579	8610	178881	-0.19167303	-0.464168586	4.071662828
2006-0311-IDN	Flash_flood	2006	311	3100	km^2	2006	6	19	2006	6	23	236	29231	55200	0.5056999	-0.463623523	4.072752955
2018-0386-VEN	Flash_flood	2018	386	3147	km^2	2018	9	25	2018	9	28	2	1000	22570.19171	-1.6578429	-0.46256811	4.07486378
2009-0355-TUR	Flash_flood	2009	355	3167	km^2	2009	9	7	2009	9	10	40	35020	550000	0.46763515	-0.462123778	4.075752443
2007-0086-IDN	Flash_flood	2007	86	3220	km^2	2007	3	1	2007	3	10	74	11556	73160.39711	0.05050009	-0.460959741	4.078080518
2014-0063-BDI	Flash_flood	2014	63	3237	km^2	2014	2	19	2014	3	10	96	12682	2000	-0.5210895	-0.460590457	4.078819086
2007-0187-LKA	Flash_flood	2007	187	3340	km^2	2007	5	2	2007	5	7	15	121000	50	-1.2765281	-0.458393548	4.083212905
2003-0681-PAK	Flash_flood	2003	681	3519	km^2	2003	9	5	2003	9	9	36	20	21220.33311	-1.6290647	-0.45473201	4.09053598
2005-0396-TWN	Flash_flood	2005	396	3540	km^2	2005	6	11	2005	6	17	16	2700	62000	-0.6944676	-0.454314701	4.091370598
1990-0027-PHL	Flash_flood	1990	27	3620	km^2	1990	6	17	1990	6	19	98	236	43	-2.0053933	-0.452747334	4.094505332
1993-0560-IDN	Flash_flood	1993	560	4050	km^2	1993	12	26	1993	12	27	72	8000	68311.08963	-0.042085283	-0.444875048	4.110249904
2007-0316-AFG	Flash_flood	2007	316	4110	km^2	2007	7	15	2007	7	17	9	2500	36193.49353	-0.9697557	-0.443843581	4.112312838
1993-0214-AUS	Flash_flood	1993	214	4160	km^2	1993	10	3	1993	10	15	1	20530	4600	-1.5507324	-0.442995519	4.114008963
2001-0450-THA	Flash_flood	2001	450	4160	km^2	2001	8	8	2001	9	6	104	450109	24500	0.6642151	-0.442995519	4.114008963
2008-0176-IDN	Flash_flood	2008	176	4200	km^2	2008	4	23	2008	4	27	30.03983811	34514	72992.41333	0.012783052	-0.442324306	4.115351388
2003-0303-BGD	Flash_flood	2003	303	4230	km^2	2003	6	19	2003	7	3	65	500000	135515.1127	0.8682244	-0.441825127	4.116349746
2006-0223-NZL	Flash_flood	2006	223	4630	km^2	2006	4	26	2006	4	28	6.887805569	1200	3000	-1.6473961	-0.435487969	4.129024063
2006-0596-AFG	Flash_flood	2006	596	5000	km^2	2006	11	16	2006	11	20	166	17580	93122.53474	0.40354764	-0.430095859	4.139808282
2003-0292-AUS	Flash_flood	2003	292	5265	km^2	2003	5	13	2003	5	18	5.585353486	300	22794.098	-1.6051973	-0.426473785	4.14705243
2008-0262-VNM	Flash_flood	2008	262	5300	km^2	2008	5	11	2008	5	12	4	500	23189.48755	-1.595076	-0.426009053	4.147981894
2004-0413-NGA	Flash_flood	2004	413	5480	km^2	2004	8	8	2004	8	12	65	10600	70153.25998	-0.010501261	-0.423666664	4.152666672
2014-0091-SLB	Flash_flood	2014	91	5481	km^2	2014	4	1	2014	4	8	47	52000	24000	0.013858963	-0.423653822	4.152692356
2006-0312-ROU	Flash_flood	2006	312	5540	km^2	2006	6	20	2006	6	26	14	5712	45731.45926	-0.64059377	-0.42290288	4.154194241
1992-0160-ALB	Flash_flood	1992	160	5620	km^2	1992	11	17	1992	11	19	11	35000	7000	-0.6973393	-0.421897365	4.156205271
2001-0645-GBR	Flash_flood	2001	645	5680	km^2	2001	10	21	2001	10	23	3.644795298	90	16966.01405	-2.0157063	-0.421152509	4.157694982
2015-0318-MKD	Flash_flood	2015	318	5957	km^2	2015	8	3	2015	8	5	7	5030	87000	-0.7412079	-0.4178129	4.164374201
2006-0651-HTI	Flash_flood	2006	651	6300	km^2	2006	11	28	2006	12	1	11	20010	53857.99711	-0.43156338	-0.413886489	4.172227023
2011-0221-PHL	Flash_flood	2011	221	6361	km^2	2011	6	28	2011	6	29	31	121005	251	-0.7762535	-0.413210661	4.173578678
2007-0251-USA	Flash_flood	2007	251	6500	km^2	2007	6	19	2007	6	20	4	120	18171.98327	-1.9204844	-0.411694596	4.176610808
2007-0501-TUN	Flash_flood	2007	501	6550	km^2	2007	10	13	2007	10	16	16	5000	45973.70017	-0.62841105	-0.411157158	4.177685685
1993-0084-HND	Flash_flood	1993	84	6650	km^2	1993	10	31	1993	11	3	374	15000	56700	0.50837845	-0.410094454	4.179811091
2004-0339-JPN	Flash_flood	2004	339	7060	km^2	2004	7	12	2004	7	14	21	25807	1950000	0.4602868	-0.405898288	4.188203425
2007-0141-DZA	Flash_flood	2007	141	7100	km^2	2007	4	13	2007	4	15	22	19556.33849	13561	-0.49596483	-0.405502048	4.188995904
1991-0128-JAM	Flash_flood	1991	128	7560	km^2	1991	5	21	1991	5	23	15	551340	30000	0.19934602	-0.401099133	4.197801734
2000-0620-NGA	Flash_flood	2000	620	7700	km^2	2000	9	20	2000	9	21	5.479456555	500	4805	-1.7967858	-0.399812224	4.200375553
2010-0233-FRA	Flash_flood	2010	233	7700	km^2	2010	6	15	2010	6	16	25	54151.5275	1500000	0.60646784	-0.399812224	4.200375553
2005-0443-SLE	Flash_flood	2005	443	7730	km^2	2005	8	14	2005	8	16	20	15000	58125.31448	-0.30682015	-0.399539525	4.200920951
1993-0075-MEX	Flash_flood	1993	75	8000	km^2	1993	9	16	1993	9	22	45	231290	109967.6665	0.57529056	-0.39713152	4.205736961
2006-0422-ETH	Flash_flood	2006	422	8070	km^2	2006	8	5	2006	8	8	503	12096	33995.86172	0.45485288	-0.396520505	4.206958989
2004-0152-KEN	Flash_flood	2004	152	8880	km^2	2004	4	9	2004	4	12	4	2000	29386.71652	-1.2789758	-0.389812123	4.220375754
2006-0038-BRA	Flash_flood	2006	38	9335	km^2	2006	1	27	2006	1	30	12	17142.67601	53420.31814	-0.43910956	-0.386307436	4.227385128
2005-0516-FRA	Flash_flood	2005	516	9810	km^2	2005	9	7	2005	9	9	1	3000	23543.11854	-1.6281564	-0.382826494	4.234347012
2004-0303-CHN	Flash_flood	2004	303	9850	km^2	2004	6	5	2004	6	6	3	740	23342.9256	-1.5973306	-0.382541086	4.234917828
2005-0392-KOR	Flash_flood	2005	392	9970	km^2	2005	8	2	2005	8	4	18	14510	56532.29382	-0.34795824	-0.38169182	4.23661636
2001-0696-BRA	Flash_flood	2001	696	9990	km^2	2001	12	24	2001	12	25	50	1946	45000	-0.4988838	-0.381551223	4.236897554
2003-0256-AFG	Flash_flood	2003	256	10280	km^2	2003	5	26	2003	6	6	6.185082552	400	24460.49274	-1.5071087	-0.379544273	4.240911453
2017-0497-PHL	Flash_flood	2017	497	10300	km^2	2017	9	22	2017	9	24	17.88969714	8000	50998.71089	-0.4856774	-0.37940789	4.241184219
2017-0504-ALB	Flash_flood	2017	504	10463	km^2	2017	11	30	2017	12	4	1	21002	8900	-1.4247491	-0.37830666	4.24338668
2006-0095-YEM	Flash_flood	2006	95	10710	km^2	2006	2	20	2006	2	23	5	2000	30795.86172	-1.2078886	-0.376670198	4.246659603
2010-0659-PHL	Flash_flood	2010	659	10773	km^2	2010	12	24	2011	1	25	110	1972446	47411	1.0918947	-0.376258842	4.247482315
2001-0402-YEM	Flash_flood	2001	402	10860	km^2	2001	7	26	2001	7	29	33	35961.14125	74970.88172	0.052089095	-0.375694716	4.248610568
1995-0209-PHL	Flash_flood	1995	209	10940	km^2	1995	9	4	1995	9	15	416	24485	700300	1.0973063	-0.375179952	4.249640096
2000-0677-CHN	Flash_flood	2000	677	11170	km^2	2000	10	12	2000	10	18	10	200000	25366	-0.14436768	-0.373720742	4.252558517
2014-0252-ITA	Flash_flood	2014	252	11256	km^2	2014	5	2	2014	5	10	3	8010	120000	-0.827725	-0.373182835	4.25363433
2007-0160-AUS	Flash_flood	2007	160	11380	km^2	2007	6	8	2007	6	12	9	5000	1300000	-0.17414653	-0.372414368	4.255171263
2000-0258-IDN	Flash_flood	2000	258	11400	km^2	2000	5	16	2000	5	24	126	50000	79000	0.5015486	-0.372291229	4.255417542
2007-0242-IRN	Flash_flood	2007	242	11600	km^2	2007	6	27	2007	6	29	12	14376.86369	22000	-0.6370329	-0.371071408	4.257857185
2006-0298-CHN	Flash_flood	2006	298	11680	km^2	2006	6	12	2006	6	16	50	12000	141000	0.06896726	-0.370589419	4.258821163
2010-0583-LKA	Flash_flood	2010	583	11880	km^2	2010	11	10	2010	12	11	7	164193	70181.13281	-0.09561825	-0.369398626	4.261202747
1996-0246-IDN	Flash_flood	1996	246	11940	km^2	1996	10	20	1996	10	22	13	5007	300	-1.6127374	-0.369045261	4.261909477
2004-0354-VNM	Flash_flood	2004	354	12020	km^2	2004	7	18	2004	7	28	53	18	8000	-1.721115	-0.368576917	4.262846165
2007-0255-PAK	Flash_flood	2007	255	12120	km^2	2007	6	16	2007	6	20	22	500	33165.94801	-1.0519917	-0.367995802	4.264008397
2015-0091-AGO	Flash_flood	2015	91	12133	km^2	2015	3	9	2015	3	23	69	1000	47459.33897	-0.52979386	-0.367920621	4.264158759
2019-0274-TUR	Flash_flood	2019	274	12361	km^2	2019	6	18	2019	6	20	10	70	20088.02088	-1.7514812	-0.366614916	4.266770168
2005-0471-IND	Flash_flood	2005	471	12680	km^2	2005	8	26	2005	8	28	27	800000	122116.4406	0.69551265	-0.364827825	4.270344351
2005-0261-BGD	Flash_flood	2005	261	12730	km^2	2005	5	25	2005	5	28	13	50000	65227.10727	-0.16952783	-0.364551848	4.270896304
2015-0227-GEO	Flash_flood	2015	227	13023	km^2	2015	6	7	2015	6	15	40	10320	23000	-0.3569931	-0.362955853	4.274088293
2001-0571-PRK	Flash_flood	2001	571	13150	km^2	2001	10	9	2001	10	11	114	177584	9400	0.33072606	-0.362275209	4.275449581
2003-0229-LKA	Flash_flood	2003	229	13490	km^2	2003	5	17	2003	5	26	235	695000	29000	1.0088463	-0.36048484	4.279030319
2015-0207-IND	Flash_flood	2015	207	14179	km^2	2015	5	17	2015	5	21	8	200	22934.55321	-1.58319	-0.356991123	4.286017754
2010-0293-PAK	Flash_flood	2010	293	14180	km^2	2010	7	21	2010	7	23	60	4000	58403.81357	-0.25821787	-0.356986173	4.286027654
2001-0494-NGA	Flash_flood	2001	494	14300	km^2	2001	8	27	2001	9	4	200	84065	3000	0.13079979	-0.356395091	4.287209818
2001-0534-CHN	Flash_flood	2001	534	14700	km^2	2001	9	19	2001	9	22	27	250000	300000	0.6323653	-0.354460179	4.291079642
2001-0271-PER	Flash_flood	2001	271	14800	km^2	2001	4	25	2001	4	26	9	310	25336.38598	-1.4457376	-0.353984678	4.292030644
2003-0179-AFG	Flash_flood	2003	179	14990	km^2	2003	4	18	2003	4	21	30	1000	39846.98236	-0.795135	-0.353089995	4.293820009
2007-0178-AFG	Flash_flood	2007	178	15490	km^2	2007	5	14	2007	5	18	23	2950	45335.87505	-0.63310933	-0.350788742	4.298422516
2008-0547-THA	Flash_flood	2008	547	15650	km^2	2008	11	20	2008	12	20	21	700000	11500	0.16391912	-0.350068033	4.299863934
2009-0551-LKA	Flash_flood	2009	551	15650	km^2	2009	12	14	2009	12	16	3	300000	65118.50458	-0.22810747	-0.350068033	4.299863934
2012-0165-GEO	Flash_flood	2012	165	15849	km^2	2012	5	12	2012	5	16	5	100018	3000	-0.86765856	-0.349181845	4.301636311
2000-0499-IRN	Flash_flood	2000	499	16200	km^2	2000	8	8	2000	8	9	8	400	6000	-1.6938212	-0.347645513	4.304708974
1985-0009-IDN	Flash_flood	1985	9	16540	km^2	1985	2	4	1985	2	4	21	300	30098.83137	-1.1832892	-0.346188711	4.307622579
2000-0038-PHL	Flash_flood	2000	38	16700	km^2	2000	1	28	2000	2	1	50	153885	4080	-0.081802495	-0.345513552	4.308972897
2004-0424-TUR	Flash_flood	2004	424	16750	km^2	2004	8	16	2004	8	17	2	100	15229.60508	-2.182874	-0.34530386	4.30939228
2006-0481-CHN	Flash_flood	2006	481	16920	km^2	2006	8	30	2006	8	31	15	20186.11618	57566.98199	-0.33075872	-0.344595592	4.310808816
2000-0373-BGD	Flash_flood	2000	373	17000	km^2	2000	6	24	2000	6	24	11	200050	79813.85308	0.09341078	-0.344264768	4.311470464
2018-0128-ISR	Flash_flood	2018	128	17900	km^2	2018	4	24	2018	4	27	12	17142.67601	53420.31814	-0.43910956	-0.34064664	4.31870672
2006-0680-MYS	Flash_flood	2006	680	18300	km^2	2006	12	19	2006	12	20	6	100000	22000	-0.44981998	-0.339096597	4.321806806
2018-0065-BDI	Flash_flood	2018	65	18675	km^2	2018	1	14	2018	1	24	20.65537464	12000	56331.0441	-0.34742922	-0.337673907	4.324652187
2011-0262-BGD	Flash_flood	2011	262	19191	km^2	2011	7	21	2011	7	29	10	1570559	111245.7301	0.53290606	-0.335762271	4.328475457
1993-0083-CUB	Flash_flood	1993	83	19320	km^2	1993	11	24	1993	11	28	34	532000	140000	0.7050134	-0.335292389	4.329415222
2001-0176-THA	Flash_flood	2001	176	19750	km^2	2001	5	4	2001	5	5	83	4130	4000	-0.65472656	-0.333748499	4.332503002
2006-0599-IRQ	Flash_flood	2006	599	19960	km^2	2006	11	5	2006	11	7	20	18020	59975.73281	-0.2649944	-0.33300672	4.333986559
2004-0434-NGA	Flash_flood	2004	434	20780	km^2	2004	8	21	2004	8	23	25	3000	46268.98337	-0.60271394	-0.330182945	4.339634111
2015-0145-PAK	Flash_flood	2015	145	21148	km^2	2015	4	26	2015	4	28	49	5067	1000	-1.0173001	-0.328951753	4.342096495
2008-0545-PHL	Flash_flood	2008	545	21770	km^2	2008	11	21	2008	11	24	10	239763	4088	-0.4448005	-0.326918717	4.346162566
2016-0333-MEX	Flash_flood	2016	333	22329	km^2	2016	9	29	2016	10	5	5	3000	25000	-1.1665783	-0.325140521	4.349718957
2005-0590-BGD	Flash_flood	2005	590	22570	km^2	2005	10	3	2005	10	20	19	100000	79515.45714	0.10941679	-0.324387573	4.351224855
2005-0028-SAU	Flash_flood	2005	28	22760	km^2	2005	1	22	2005	1	27	29	67	24931.24088	-1.4222825	-0.323799634	4.352400731
2012-0172-PHL	Flash_flood	2012	172	23516	km^2	2012	6	9	2012	6	12	1	700	18360.51929	-1.9599882	-0.321507812	4.356984376
2010-0576-IDN	Flash_flood	2010	576	23685	km^2	2010	11	2	2010	11	5	16	200	26526.26664	-1.3623729	-0.321005556	4.357988887
2006-0332-IDN	Flash_flood	2006	332	23710	km^2	2006	6	25	2006	6	29	52	18250	73454.60354	0.04229623	-0.320931579	4.358136842
2017-0109-AGO	Flash_flood	2017	109	24003	km^2	2017	3	21	2017	4	8	11	30250	2000	-0.9566616	-0.320070206	4.359859588
2015-0292-VNM	Flash_flood	2015	292	24337	km^2	2015	7	25	2015	8	5	32	15000	204000	0.055906557	-0.319100944	4.361798112
2019-0632-IDN	Flash_flood	2019	632	24987	km^2	2019	12	31	2020	1	3	66	501110	1200000	1.2744893	-0.317252317	4.365495367
2000-0754-ZAF	Flash_flood	2000	754	25650	km^2	2000	11	19	2000	11	23	3	3000	29649.07701	-1.2781698	-0.315415595	4.36916881
2000-0699-ESP	Flash_flood	2000	699	26690	km^2	2000	10	20	2000	10	26	8	500	75000	-1.1849332	-0.312628005	4.37474399
1995-0305-ZAF	Flash_flood	1995	305	26830	km^2	1995	12	25	1996	1	2	207	4500	10000	-0.21333961	-0.312261062	4.375477876
2001-0545-IRN	Flash_flood	2001	545	27360	km^2	2001	10	1	2001	10	2	12.6352322	3000	40094.51971	-0.82010305	-0.310889139	4.378221722
2007-0192-AFG	Flash_flood	2007	192	27490	km^2	2007	4	23	2007	5	4	36	38327.34545	77188.50347	0.094338655	-0.310556643	4.378886714
2000-0535-KOR	Flash_flood	2000	535	27590	km^2	2000	8	26	2000	8	29	7	500	27000	-1.4104141	-0.310302004	4.379395993
2005-0628-VNM	Flash_flood	2005	628	28850	km^2	2005	10	20	2005	10	28	67	33800	12000	-0.099189654	-0.307169945	4.38566011
1993-0213-VNM	Flash_flood	1993	213	29440	km^2	1993	10	2	1993	10	12	64	15000	10000	-0.30527067	-0.305750064	4.388499872
2009-0335-PAK	Flash_flood	2009	335	30560	km^2	2009	8	15	2009	8	17	36	75000	86569.19661	0.24741286	-0.303131364	4.393737272
2016-0240-PAK	Flash_flood	2016	240	31431	km^2	2016	7	3	2016	7	6	46	410	37428.78774	-0.86226416	-0.301160333	4.397679334
2014-0471-THA	Flash_flood	2014	471	31653	km^2	2014	11	7	2014	11	16	20.65537464	12000	56331.0441	-0.34742922	-0.300666706	4.398666589
2001-0445-PHL	Flash_flood	2001	445	31880	km^2	2001	8	12	2001	8	14	37	79000	8000	-0.17317595	-0.30016552	4.39966896
2011-0083-THA	Flash_flood	2011	83	33575	km^2	2011	3	23	2011	4	5	64	716110	317000	1.0909598	-0.296532209	4.406935582
2006-0099-IDN	Flash_flood	2006	99	33830	km^2	2006	2	13	2006	2	23	39	17539	25000	-0.2444828	-0.296001593	4.407996814
2008-0444-DZA	Flash_flood	2008	444	34760	km^2	2008	10	1	2008	10	17	93	59050	348000	0.7222387	-0.294099522	4.411800955
2011-0619-VEN	Flash_flood	2011	619	37648	km^2	2011	4	15	2011	4	25	9	13885.99496	48512.00558	-0.578798	-0.288501735	4.42299653
2008-0481-VNM	Flash_flood	2008	481	39090	km^2	2008	10	19	2008	10	20	29	12004	4000	-0.73935634	-0.285865578	4.428268845
2016-0096-NZL	Flash_flood	2016	96	39334	km^2	2016	3	23	2016	3	24	5.64711182	300	25000	-1.5851116	-0.285429139	4.429141722
1991-0714-TUR	Flash_flood	1991	714	40170	km^2	1991	5	16	1991	5	17	42	500	25000	-0.92302394	-0.283954076	4.432091848
2008-0224-LKA	Flash_flood	2008	224	40670	km^2	2008	5	29	2008	6	5	25	362582	104964.228	0.49055037	-0.283086483	4.433827035
2017-0096-IRN	Flash_flood	2017	96	40808	km^2	2017	4	15	2017	4	16	42	57416.15559	353000	0.49682856	-0.282848899	4.434302201
2014-0204-TJK	Flash_flood	2014	204	41719	km^2	2014	5	10	2014	5	16	15.94738809	5785	47100.9337	-0.5962082	-0.281300394	4.437399211
1993-0421-USA	Flash_flood	1993	421	42380	km^2	1993	1	20	1993	1	21	4.837495683	200	20636.39436	-1.7434455	-0.280197826	4.439604347
2007-0172-CHN	Flash_flood	2007	172	43530	km^2	2007	5	24	2007	5	26	43	2300050	78000	0.9508317	-0.278320036	4.443359928
2014-0185-AFG	Flash_flood	2014	185	44203	km^2	2014	6	3	2014	6	10	81	10035	3000	-0.5400125	-0.277244022	4.445511956
2008-0482-KEN	Flash_flood	2008	482	45130	km^2	2008	10	14	2008	10	16	3	6000	33376.5257	-1.1201197	-0.275788356	4.448423287
2010-0101-SRB	Flash_flood	2010	101	46900	km^2	2010	3	1	2010	3	2	12.8556939	3150	40577.18898	-0.8034676	-0.273090195	4.453819611
2001-0390-POL	Flash_flood	2001	390	47890	km^2	2001	7	20	2001	8	3	27	15000	700000	0.23535481	-0.271625098	4.456749804
1999-0235-IRN	Flash_flood	1999	235	50100	km^2	1999	7	15	1999	7	27	51	20100	43000	-0.0427482	-0.268460933	4.463078133
2017-0495-IND	Flash_flood	2017	495	50536	km^2	2017	10	30	2017	11	8	21	4000	46853.45526	-0.59266144	-0.267853197	4.464293607
2000-0332-IND	Flash_flood	2000	332	55000	km^2	2000	6	10	2000	6	10	20	3000000	143710.5108	0.90129197	-0.261916358	4.476167284
1993-0222-THA	Flash_flood	1993	222	56410	km^2	1993	11	27	1993	12	2	23	393809	1261000	0.9411678	-0.260140972	4.479718056
2003-0109-AUS	Flash_flood	2003	109	57420	km^2	2003	2	21	2003	2	24	3.783516919	100	17410.14691	-1.9797823	-0.258896335	4.482207329
2006-0221-AFG	Flash_flood	2006	221	58310	km^2	2006	4	28	2006	5	1	19	5025	47702.92777	-0.57252717	-0.257817579	4.484364842
2016-0131-AGO	Flash_flood	2016	131	59746	km^2	2016	4	16	2016	4	22	23	5600	50582.45417	-0.48695862	-0.256111287	4.487777426
2007-0103-YEM	Flash_flood	2007	103	59870	km^2	2007	3	23	2007	3	30	36	618	38133.49226	-0.8467902	-0.255965875	4.488068251
2009-0063-IDN	Flash_flood	2009	63	60610	km^2	2009	1	27	2009	2	2	18	12000	54727.31299	-0.39126587	-0.255104234	4.489791532
2006-0040-PHL	Flash_flood	2006	40	63470	km^2	2006	1	26	2006	2	5	4	256641	9600	-0.53074145	-0.25187044	4.49625912
2006-0361-KOR	Flash_flood	2006	361	65230	km^2	2006	7	12	2006	7	20	324	89130	192323.6097	1.0433688	-0.249952049	4.500095902
1996-0148-ITA	Flash_flood	1996	148	66760	km^2	1996	6	19	1996	6	21	17	300	32000	-1.231163	-0.248326022	4.503347957
2018-0157-GTM	Flash_flood	2018	157	67482	km^2	2018	5	18	2018	5	22	2	76845	47389.95757	-0.667836	-0.247571534	4.504856931
2008-0634-MYS	Flash_flood	2008	634	67570	km^2	2008	12	28	2009	1	19	16.15504371	6000	47524.37325	-0.5837662	-0.247480167	4.505039667
2016-0032-ECU	Flash_flood	2016	32	69542	km^2	2016	1	1	2016	1	25	9	10000	10000	-0.93408895	-0.245462582	4.509074836
2008-0386-ETH	Flash_flood	2008	386	69940	km^2	2008	8	20	2008	8	28	5	91764	59207.72163	-0.33547464	-0.245062329	4.509875342
2015-0107-IND	Flash_flood	2015	107	70288	km^2	2015	3	20	2015	3	31	44	2122	76000	-0.42115903	-0.244714181	4.510571637
2001-0587-VNM	Flash_flood	2001	587	72000	km^2	2001	10	20	2001	10	24	20	35006	4700	-0.60329753	-0.24302635	4.513947299
2018-0063-MYS	Flash_flood	2018	63	74296	km^2	2018	2	3	2018	2	12	15.03575238	4900	45221.42916	-0.6528194	-0.240824692	4.518350616
2005-0192-PAK	Flash_flood	2005	192	75650	km^2	2005	3	20	2005	3	24	20	3500	45330.05921	-0.638652	-0.23955805	4.5208839
2001-0453-IRN	Flash_flood	2001	453	77940	km^2	2001	8	10	2001	8	12	412	1200200	78800	1.457441	-0.237466421	4.525067158
2006-0270-THA	Flash_flood	2006	270	78280	km^2	2006	5	22	2006	6	11	116	342895	25000	0.6450243	-0.237161148	4.525677704
2007-0449-DZA	Flash_flood	2007	449	78590	km^2	2007	9	21	2007	9	24	18	19961.60016	29500	-0.40501288	-0.236883968	4.526232065
2014-0134-AFG	Flash_flood	2014	134	83722	km^2	2014	4	24	2014	5	2	431	140100	162194.0196	1.1807766	-0.232447274	4.535105451
2018-0219-NPL	Flash_flood	2018	219	85852	km^2	2018	7	1	2018	7	11	15	1406	36516.77276	-0.93825525	-0.230685266	4.538629469
2008-0560-LKA	Flash_flood	2008	560	103400	km^2	2008	11	22	2008	12	4	15	360000	94177.0866	0.3261863	-0.217641331	4.564717339
2001-0521-TCD	Flash_flood	2001	521	104300	km^2	2001	8	19	2001	10	11	100	175763	1000	-0.12052788	-0.21703346	4.56593308
2019-0216-TJK	Flash_flood	2019	216	106546	km^2	2019	6	1	2019	6	7	4	6750	36174.69325	-1.0016156	-0.215539201	4.568921599
2001-0376-PAK	Flash_flood	2001	376	111100	km^2	2001	7	22	2001	7	25	210	400179	246000	1.262504	-0.212603723	4.574792553
2016-0112-PAK	Flash_flood	2016	112	111748	km^2	2016	4	2	2016	4	8	92	77	32531.70931	-1.0227735	-0.212195845	4.575608309
2008-0506-SOM	Flash_flood	2008	506	111900	km^2	2008	11	3	2008	11	4	34.73819375	52000	80711.68934	0.1525361	-0.212100531	4.575798938
2000-0302-CHN	Flash_flood	2000	302	114000	km^2	2000	5	31	2000	6	19	34	154183	22000	0.120845504	-0.210796499	4.578407003
2006-0619-TUR	Flash_flood	2006	619	122300	km^2	2006	10	27	2006	11	7	47	63015	317000	0.526799	-0.205867382	4.588265235
2014-0488-FRA	Flash_flood	2014	488	123269	km^2	2014	11	29	2014	12	5	5	3000	303000	-0.7072361	-0.205313891	4.589372218
2000-0534-IND	Flash_flood	2000	534	129500	km^2	2000	8	23	2000	8	31	179	252016	173000	1.0620836	-0.201855356	4.596289288
2018-0162-DZA	Flash_flood	2018	162	132889	km^2	2018	4	24	2018	4	28	6	200	21590.65369	-1.6748372	-0.200043449	4.599913101
2008-0499-YEM	Flash_flood	2008	499	133200	km^2	2008	10	23	2008	10	24	90	25064	400000	0.5702556	-0.199879509	4.600240982
2019-0255-AFG	Flash_flood	2019	255	133360	km^2	2019	5	22	2019	5	27	24	561	34448.10098	-0.9980245	-0.199795298	4.600409404
2016-0239-IND	Flash_flood	2016	239	135742	km^2	2016	6	25	2016	7	1	61	57322.61217	100000	0.36875272	-0.198553671	4.602892657
2010-0373-IND	Flash_flood	2010	373	145000	km^2	2010	8	6	2010	8	8	196	12725	91246.94833	0.3827771	-0.193926216	4.612147568
2008-0498-MAR	Flash_flood	2008	498	146700	km^2	2008	10	23	2008	11	3	30	20000	66477.09424	-0.112054	-0.193108721	4.613782558
2019-0094-ZWE	Flash_flood	2019	94	154678	km^2	2019	2	11	2019	2	18	26	30199.74411	69215.63942	-0.06367514	-0.18939461	4.62121078
2015-0106-CHL	Flash_flood	2015	106	154773	km^2	2015	3	25	2015	4	8	178	193881	1500000	1.406644	-0.189351535	4.62129693
2009-0590-MAR	Flash_flood	2009	590	157500	km^2	2009	12	25	2009	12	26	5	7520	38615.46471	-0.9058971	-0.188126496	4.623747007
2017-0218-CHL	Flash_flood	2017	218	157699	km^2	2017	5	11	2017	5	15	2	3000	27230.13648	-1.4073393	-0.188037938	4.623924125
2010-0341-PAK	Flash_flood	2010	341	160000	km^2	2010	7	28	2010	8	7	1985	20359496	9500000	3.33637	-0.187021988	4.625956023
2010-0613-MAR	Flash_flood	2010	613	180760	km^2	2010	11	25	2010	12	6	32	75003	29000	0.013092488	-0.178465648	4.643068705
2007-0348-PAK	Flash_flood	2007	348	190100	km^2	2007	8	10	2007	8	13	44	20	327118	-1.069269	-0.174932132	4.650135736
2006-0207-IND	Flash_flood	2006	207	190900	km^2	2006	4	15	2006	4	18	20	24920.36344	63391.4517	-0.19107026	-0.174637628	4.650724745
2008-0288-MEX	Flash_flood	2008	288	193700	km^2	2008	7	6	2008	7	11	12	20000	54845.99068	-0.40395802	-0.173616394	4.652767211
2007-0003-BRA	Flash_flood	2007	3	210600	km^2	2007	1	1	2007	1	12	59	200080	125000	0.6462128	-0.167749453	4.664501094
1998-0321-CHN	Flash_flood	1998	321	212000	km^2	1998	8	31	1998	8	31	50	80000	20124	0.08342494	-0.167284788	4.665430424
2014-0123-KAZ	Flash_flood	2014	123	213897	km^2	2014	3	23	2014	4	15	5	2709	32434.43681	-1.1387005	-0.166659995	4.666680011
2002-0376-RUS	Flash_flood	2002	376	224600	km^2	2002	6	19	2002	7	1	91	330613	443000	1.0991843	-0.163235438	4.673529123
2019-0392-SDN	Flash_flood	2019	392	228504	km^2	2019	7		2019	9	6	78	346300	132237.5379	0.84255546	-0.162026854	4.675946292
2019-0500-KEN	Flash_flood	2019	500	232028	km^2	2019	10	10	2019	12	13	90	233339	127381.1828	0.79811853	-0.160953449	4.678093103
2016-0101-ETH	Flash_flood	2016	101	244000	km^2	2016	4	2	2016	4	7	28	3080	47596.32745	-0.5606099	-0.157424883	4.685150234
2018-0062-BOL	Flash_flood	2018	62	245648	km^2	2018	2	10	2018	2	21	6	12186	43571.06498	-0.73774534	-0.156952793	4.686094414
2002-0350-CHN	Flash_flood	2002	350	252000	km^2	2002	6	8	2002	6	18	793	80035257	3100000	3.1424124	-0.155162224	4.689675553
2003-0351-MNG	Flash_flood	2003	351	281900	km^2	2003	7	21	2003	8	10	15	1650	270	-1.8102748	-0.147298299	4.705403403
2016-0424-MEX	Flash_flood	2016	424	322162	km^2	2016	11	3	2016	11	10	2	35000	41431.82563	-0.8471592	-0.137934964	4.724130072
2010-0109-KAZ	Flash_flood	2010	109	323800	km^2	2010	2		2010	3		44	16200	34576	-0.16662025	-0.137579258	4.724841484
2018-0383-IRN	Flash_flood	2018	383	340197	km^2	2018	10	5	2018	10	6	9	7135	166000	-0.4831882	-0.134114636	4.731770727
2008-0246-IND	Flash_flood	2008	246	350600	km^2	2008	6	11	2008	7	21	1063	7900000	123000	2.175141	-0.132002005	4.73599599
2016-0095-CHN	Flash_flood	2016	95	383224	km^2	2016	3	19	2016	3	22	5	219300	170000	0.029969893	-0.125761766	4.748476468
2014-0321-CHN	Flash_flood	2014	321	387775	km^2	2014	8	11	2014	8	19	27	150000	487000	0.6211567	-0.12493377	4.75013246
2004-0626-IRN	Flash_flood	2004	626	436700	km^2	2004	12	9	2004	12	28	34	4043	51934.78485	-0.43672338	-0.116600096	4.766799807
2007-0250-IND	Flash_flood	2007	250	449300	km^2	2007	6	22	2007	7	4	127	200000	133370.1297	0.8726728	-0.11460512	4.770789761
2018-0104-AGO	Flash_flood	2018	104	523613	km^2	2018	2	22	2018	3	3	12.83749568	3200	57063.23547	-0.7379935	-0.103869862	4.792260276
1996-0471-RUS	Flash_flood	1996	471	524900	km^2	1996	8	1	1996	8	25	4	14000	140000	-0.60905975	-0.103697695	4.792604611
2018-0387-SDN	Flash_flood	2018	387	629242	km^2	2018	8	1	2018	9	4	23	70060	77887.33551	0.08914866	-0.09098144	4.81803712
2015-0258-IRN	Flash_flood	2015	258	776608	km^2	2015	7	14	2015	7	21	23	4030	47817.71574	-0.5619767	-0.076223387	4.847553226
2015-0212-USA	Flash_flood	2015	212	849465	km^2	2015	5	23	2015	5	30	32	12000	2700000	0.48759493	-0.069934187	4.860131626
1999-0103-CHN	Forest_fire	1999	103	1	km^2	1999	4	3	1999	4	3	23	27606.27167	66430.23899	-0.1232066	-1.61164545	1.7767091
2002-0181-JPN	Forest_fire	2002	181	2	km^2	2002	3	22	2002	3	22	5.019830435	222	21171.4128	-1.7078626	-1.533270242	1.933459516
1997-0219-USA	Forest_fire	1997	219	5	km^2	1997	9	14	1997	9	14	5.585353486	300	22794.098	-1.6051973	-1.42966385	2.140672301
2003-0347-HRV	Forest_fire	2003	347	6	km^2	2003	7	18	2003	7	23	21.93337372	21080.29631	20000	-0.41052893	-1.409048474	2.181903051
1997-0210-PER	Forest_fire	1997	210	6	km^2	1997	9	7	1997	9	7	8.559101681	1000	30624.21746	-1.1946882	-1.409048474	2.181903051
2000-0188-TUR	Forest_fire	2000	188	8	km^2	2000	4	5	2000	4	5	5.89909607	350	23672.38126	-1.5526378	-1.376519826	2.246960348
1992-0269-USA	Forest_fire	1992	269	10	km^2	1992	8	17	1992	8	17	9.633551568	990	85000	-0.9756043	-1.351288642	2.297422717
1985-0278-TUR	Forest_fire	1985	278	11	km^2	1985	9	6	1985	9	6	13	18177.63587	54872.22138	-0.40024364	-1.340511771	2.318976458
1994-0139-ESP	Forest_fire	1994	139	15	km^2	1994	6	6	1994	6	6	9.882305792	1500	33826.23118	-1.0564399	-1.305442082	2.389115836
1996-0175-TUR	Forest_fire	1996	175	15	km^2	1996	7	31	1996	7	31	6.694270786	500	25836.49623	-1.4310251	-1.305442082	2.389115836
2003-0299-USA	Forest_fire	2003	299	16	km^2	2003	6	17	2003	6	20	7.729178716	750	28537.91301	-1.292777	-1.298144618	2.403710764
2002-0092-USA	Forest_fire	2002	92	23	km^2	2002	2	10	2002	2	10	3.70765611	134	6600	-2.1065135	-1.25711034	2.48577932
1990-0615-MNG	Forest_fire	1990	615	23	km^2	1990	5		1990	5		32.70391234	38569.97223	110000	0.13391864	-1.25711034	2.48577932
1999-0642-FRA	Forest_fire	1999	642	24	km^2	1999	7	22	1999	7	22	1.395437871	6	8732.299554	-2.9390488	-1.252298058	2.495403883
2000-0407-BGR	Forest_fire	2000	407	36	km^2	2000	7	1	2000	7	1	7	167	17600	-1.7047576	-1.206451499	2.587097002
2005-0367-FRA	Forest_fire	2005	367	36	km^2	2005	6	20	2005	8	26	2	3728.716953	10000	-1.5490323	-1.206451499	2.587097002
1986-0083-FRA	Forest_fire	1986	83	40	km^2	1986	7	24	1986	7	24	5	2000	30795.86172	-1.2078886	-1.194538226	2.610923549
2017-0297-HRV	Forest_fire	2017	297	45	km^2	2017	7	16	2017	7	18	3.49573019	80	16482.91503	-2.055866	-1.181220315	2.637559371
1985-0087-FRA	Forest_fire	1985	87	45	km^2	1985	8		1985	8		6	130	20058.69476	-1.7730635	-1.181220315	2.637559371
1992-0155-CRI	Forest_fire	1992	155	45	km^2	1992	4	9	1992	4	9	9.13062575	1200	32024.71082	-1.1325235	-1.181220315	2.637559371
1999-0342-IDN	Forest_fire	1999	342	56	km^2	1999	6		1999	6		12.47515362	8980.015562	1800	-1.1795574	-1.15649282	2.68701436
1997-0174-USA	Forest_fire	1997	174	57	km^2	1997	8	9	1997	8	9	5.655868239	700	2500	-1.8420728	-1.154491486	2.691017028
1994-0170-CAN	Forest_fire	1994	170	59	km^2	1994	7	24	1994	7	24	12.6352322	3000	40094.51971	-0.82010305	-1.150592068	2.698815864
2004-0196-USA	Forest_fire	2004	196	66	km^2	2004	5	2	2004	5	4	22.35583125	15000	59499.89466	-0.27134576	-1.137914795	2.724170409
2004-0348-USA	Forest_fire	2004	348	68	km^2	2004	7	12	2004	7	16	5.175719015	242	21624.09635	-1.6784513	-1.134539286	2.730921428
1999-0145-CAN	Forest_fire	1999	145	80	km^2	1999	3	5	1999	3	5	9.882305792	1500	33826.23118	-1.0564399	-1.116163018	2.767673964
1996-0250-USA	Forest_fire	1996	250	81	km^2	1996	10	19	1996	10	19	17.94829764	15566.24021	8500	-0.68380404	-1.11475838	2.77048324
2000-0363-USA	Forest_fire	2000	363	85	km^2	2000	6	12	2000	6	12	8.5893499	1010	30699.04744	-1.1912956	-1.109308102	2.781383796
2002-0618-USA	Forest_fire	2002	618	93	km^2	2002	9	22	2002	9	22	11.34319349	2213	37211.40315	-0.92384535	-1.099137524	2.801724951
2000-0194-KOR	Forest_fire	2000	194	100	km^2	2000	4	6	2000	4	6	2	855	21974.14042	-1.6935629	-1.090931833	2.818136333
1995-0159-GRC	Forest_fire	1995	159	100	km^2	1995	7	22	1995	7	22	10.97051885	2014	36361.30125	-0.95597273	-1.090931833	2.818136333
1997-0194-RUS	Forest_fire	1997	194	100	km^2	1997	7	14	1997	7	14	14	19191.48361	56251.63112	-0.36425933	-1.090931833	2.818136333
1997-0206-KAZ	Forest_fire	1997	206	110	km^2	1997	8	17	1997	8	17	17.88969714	8000	50998.71089	-0.4856774	-1.080154963	2.839690075
2000-0128-USA	Forest_fire	2000	128	113	km^2	2000	2	26	2000	2	26	7.141271984	600	27018.03711	-1.3688604	-1.077112497	2.845775006
2000-0455-GRC	Forest_fire	2000	455	115	km^2	2000	7		2000	7		2	102	15281.21685	-2.1783588	-1.07512874	2.849742521
1999-0117-BTN	Forest_fire	1999	117	121	km^2	1999	1		1999	1		14.57878532	11366.36437	3500	-0.9671829	-1.069378092	2.861243816
2002-0184-USA	Forest_fire	2002	184	149	km^2	2002	3		2002	3		7.512765099	1300	5000	-1.5133	-1.045841617	2.908316765
1982-0304-FRA	Forest_fire	1982	304	150	km^2	1982	8	24	1982	8	24	2	18	11361.99157	-2.573879	-1.045085274	2.909829452
2000-0639-MKD	Forest_fire	2000	639	160	km^2	2000	8		2000	8		20.02529137	18369.66656	13563	-0.5345684	-1.03778781	2.92442438
2009-0271-ESP	Forest_fire	2009	271	170	km^2	2009	7	20	2009	7	24	6	10318.40918	42350.13248	-0.7756781	-1.030932894	2.938134212
2002-0089-CHL	Forest_fire	2002	89	170	km^2	2002	2		2002	2		30.35220786	34453.79573	80000	0.032213647	-1.030932894	2.938134212
2003-0365-FRA	Forest_fire	2003	365	180	km^2	2003	7	28	2003	7	30	5	3004	33012.3035	-1.1151314	-1.024469899	2.951060203
2017-0252-USA	Forest_fire	2017	252	190	km^2	2017	7	6	2017	7	10	4.429600755	156	19416.39685	-1.8281615	-1.018356445	2.963287109
2000-0240-USA	Forest_fire	2000	240	194	km^2	2000	5		2000	9		38.96339568	25400	1500000	0.5818789	-1.016000717	2.967998567
1998-0088-PHL	Forest_fire	1998	88	200	km^2	1998	4	2	1998	4	2	2	300	18373.97765	-1.9323707	-1.012556626	2.974886749
1994-0306-DZA	Forest_fire	1994	306	200	km^2	1994	8		1994	8		22	26722.01514	65448.26845	-0.14479096	-1.012556626	2.974886749
2000-0528-HRV	Forest_fire	2000	528	203	km^2	2000	8		2000	8		1	2633.419504	17750	-1.7057773	-1.01087313	2.978253739
2004-0208-RUS	Forest_fire	2004	208	245	km^2	2004	5	14	2004	5	16	9	1000	30948.79873	-1.1786865	-0.989609784	3.020780432
1999-0297-USA	Forest_fire	1999	297	250	km^2	1999	8	24	1999	8	24	4.457337864	90	92000	-1.6481093	-0.987325441	3.025349118
1998-0231-ESP	Forest_fire	1998	231	270	km^2	1998	7		1998	7		7.528638975	600	42108	-1.2723756	-0.978623339	3.042753322
2001-0722-USA	Forest_fire	2001	722	283	km^2	2001	10	30	2001	10	30	1	2777.901146	23235.76322	-1.6456947	-0.973306182	3.053387637
2017-0176-PRT	Forest_fire	2017	176	300	km^2	2017	6	17	2017	6	21	64	704	232000	-0.32767338	-0.966710066	3.066579868
1999-0121-IND	Forest_fire	1999	121	349	km^2	1999	4		1999	4		6	10318.40918	42350.13248	-0.7756781	-0.949603536	3.100792928
1986-0071-PRT	Forest_fire	1986	71	375	km^2	1986	6	15	1986	6	15	15	50	20650.61725	-1.6990333	-0.941478882	3.117042237
1999-0013-CHL	Forest_fire	1999	13	400	km^2	1999	1	2	1999	1	2	11.1388331	1000	280000	-0.7134961	-0.934181418	3.131637165
2004-0373-ESP	Forest_fire	2004	373	420	km^2	2004	7	28	2004	8	4	3	1100	3000	-1.8971568	-0.92866466	3.142670679
1991-0479-NIC	Forest_fire	1991	479	500	km^2	1991	1	15	1991	3	12	30.35220786	34453.79573	80000	0.032213647	-0.908950233	3.182099533
1994-0154-USA	Forest_fire	1994	154	607	km^2	1994	7	6	1994	7	6	13	18177.63587	54872.22138	-0.40024364	-0.887023334	3.225953332
2003-0786-USA	Forest_fire	2003	786	607	km^2	2003	10	21	2003	11	4	4	40	3500000	-1.1678647	-0.887023334	3.225953332
2000-0406-USA	Forest_fire	2000	406	607	km^2	2000	6	27	2000	6	27	17.95055478	8077	51118.66609	-0.48241153	-0.887023334	3.225953332
1999-0112-USA	Forest_fire	1999	112	688	km^2	1999	4	15	1999	4	15	7.261783279	629	27332.63699	-1.3527665	-0.872860009	3.254279982
2002-0351-USA	Forest_fire	2002	351	770	km^2	2002	6	8	2002	6	8	9.425710137	1572	20000	-1.1572199	-0.860127957	3.279744086
1997-0220-IDN	Forest_fire	1997	220	800	km^2	1997	9		1997	9		240	32070	8000000	1.4448267	-0.85580621	3.288387581
1993-0440-USA	Forest_fire	1993	440	870	km^2	1993	10	27	1993	11	3	3	130	1000000	-1.2473682	-0.846321614	3.307356771
2000-0104-ETH	Forest_fire	2000	104	970	km^2	2000	2		2000	2		1.308091751	5	8350.422482	-3.0012136	-0.834019117	3.331961767
2005-0014-AUS	Forest_fire	2005	14	1000	km^2	2005	1	4	2005	1	26	12	220	40000	-1.3485438	-0.830575025	3.338849949
2005-0538-BOL	Forest_fire	2005	538	1000	km^2	2005	9		2005	9		12.6352322	3000	40094.51971	-0.82010305	-0.830575025	3.338849949
1983-0099-ITA	Forest_fire	1983	99	1000	km^2	1983	7	25	1983	7	25	7	20	15047.73757	-2.1507602	-0.830575025	3.338849949
1995-0098-CAN	Forest_fire	1995	98	1000	km^2	1995	6	1	1995	6	30	11.09589328	1500	89500	-0.8448715	-0.830575025	3.338849949
1991-0418-IDN	Forest_fire	1991	418	1000	km^2	1991	8	1	1991	10	27	57	8	13200	-1.7679459	-0.830575025	3.338849949
1992-0502-CHL	Forest_fire	1992	502	1010	km^2	1992			1992			33.37758877	39777.82003	120000	0.16170754	-0.829449945	3.341100109
2001-0303-USA	Forest_fire	2001	303	1030	km^2	2001	4		2001	4		1	139	13929.52832	-2.3286037	-0.827232783	3.345534434
2004-0383-PRT	Forest_fire	2004	383	1080	km^2	2004	7		2004	8		2	4615.115729	29309.51355	-1.3091265	-0.821872923	3.356254154
2003-0518-USA	Forest_fire	2003	518	1133	km^2	2003	10	25	2003	11	4	14	27104	59669.07046	-0.28554422	-0.816455912	3.367088176
2003-0372-ESP	Forest_fire	2003	372	1190	km^2	2003	1		2003	8		5	200	20780.00945	-1.7329197	-0.810905888	3.378188224
2002-0379-USA	Forest_fire	2002	379	1320	km^2	2002	6	20	2002	6	20	11.56732778	1269	200500	-0.717593	-0.799182779	3.401634441
1994-0359-IDN	Forest_fire	1994	359	1360	km^2	1994	10		1994	10		146.2786217	3000000	218209.0649	1.5351796	-0.79580727	3.40838546
2007-0392-GRC	Forest_fire	2007	392	1600	km^2	2007	8	24	2007	8	30	65	5392	1750000	0.44887736	-0.777431002	3.445137997
1998-0123-CAN	Forest_fire	1998	123	1900	km^2	1998	5	2	1998	5	2	17.88969714	8000	50998.71089	-0.4856774	-0.757999637	3.484000726
2002-0279-RUS	Forest_fire	2002	279	2000	km^2	2002	5	11	2002	5	11	4.036156326	120	18206.33847	-1.9176177	-0.752199817	3.495600365
1995-0135-CAN	Forest_fire	1995	135	2210	km^2	1995	6	24	1995	6	24	15.14383294	5000	45446.05623	-0.64593095	-0.740910145	3.51817971
2017-0417-PRT	Forest_fire	2017	417	2240	km^2	2017	10	15	2017	10	16	45	2771	500000	-0.015564896	-0.739385596	3.521228808
1998-0124-MEX	Forest_fire	1998	124	2448	km^2	1998	4	1	1998	6	26	50	30427.296	8000	-0.27643076	-0.729345335	3.541309329
2003-0369-CAN	Forest_fire	2003	369	2500	km^2	2003	8	1	2003	9	14	1	5193.742395	545000	-0.9417919	-0.726968633	3.546062734
2002-0409-CAN	Forest_fire	2002	409	2670	km^2	2002	7		2002	7		7.141271984	600	27018.03711	-1.3688604	-0.719529907	3.560940186
1994-0155-ESP	Forest_fire	1994	155	2700	km^2	1994	7	4	1994	7	4	20	15020	58138.54835	-0.30651647	-0.718266531	3.563466938
1997-0159-FRA	Forest_fire	1997	159	3000	km^2	1997	7	26	1997	7	26	9.287323821	1259	32403.92272	-1.1161585	-0.706353258	3.587293484
2008-0253-USA	Forest_fire	2008	253	3500	km^2	2008	6	20	2008	7	9	1	300	102000	-1.8108191	-0.688923174	3.622153653
2004-0446-USA	Forest_fire	2004	446	4046	km^2	2004	8	13	2004	8	14	5.198376375	245	21689.53876	-1.6742502	-0.672531741	3.654936518
2003-0376-PRT	Forest_fire	2003	376	4260	km^2	2003	8		2003	9		14	150000	1730000	0.67069435	-0.666703992	3.666592016
1998-0057-IDN	Forest_fire	1998	57	4428	km^2	1998	3		1998	4		3	2000	1300000	-0.66178495	-0.662330485	3.675339031
2017-0002-CHL	Forest_fire	2017	2	4670	km^2	2017	1	15	2017	3	16	11	7623	550000	-0.19345333	-0.656313812	3.687372376
1998-0300-RUS	Forest_fire	1998	300	5000	km^2	1998	7	20	1998	10	21	3	100683	270000	-0.18086395	-0.648593479	3.702813042
1922-0011-CAN	Forest_fire	1922	11	5179	km^2	1922	9	30	1922	9	30	43	11000	8000	-0.51864153	-0.644616259	3.710767481
1999-0274-RUS	Forest_fire	1999	274	5861	km^2	1999	7		1999	7		32.93368115	38980.51084	113336	0.14346036	-0.630628325	3.738743349
2016-0172-CAN	Forest_fire	2016	172	6000	km^2	2016	5	1	2016	7	4	65.60433233	88000	4000000	1.1525578	-0.627978104	3.744043792
1994-0192-USA	Forest_fire	1994	192	10000	km^2	1994	8	6	1994	8	6	9.13062575	1200	32024.71082	-1.1325235	-0.570218217	3.859563566
1989-0280-CAN	Forest_fire	1989	280	20000	km^2	1989	1		1989	8		1	25000	4200000	-0.25693527	-0.491843063	4.016313874
2000-0853-ARG	Forest_fire	2000	853	20500	km^2	2000	12		2000	12		8	12738.38406	46635.00249	-0.6359894	-0.489051041	4.021897919
1987-0095-CHN	Forest_fire	1987	95	25000	km^2	1987	5		1987	5		191	56313	110000	0.70231533	-0.466611879	4.066776242
2003-0030-AUS	Forest_fire	2003	30	30000	km^2	2003	1	8	2003	2	18	4	2650	300000	-0.79591584	-0.445996504	4.108006993
1996-0074-MNG	Forest_fire	1996	74	80000	km^2	1996	4	8	1996	5	9	25	5061	1712800	0.16499639	-0.335092647	4.329814706
1996-0100-RUS	Forest_fire	1996	100	80000	km^2	1996	5		1996	5		19	600	33178.45691	-1.0571227	-0.335092647	4.329814706
2019-0650-BEL	Heat_wave	2019	650	35	Degree_C	2019	8	23	2019	8	29	188	128601.4081	134291.9597	0.89694136	-0.102823285	4.794353431
2010-0331-JPN	Heat_wave	2010	331	35	Degree_C	2010	7	19	2010	7	25	170	15000	91085.50181	0.374944	-0.102823285	4.794353431
2011-0573-JPN	Heat_wave	2011	573	35	Degree_C	2011	7		2011	8		36	22000	70204.32709	-0.032238983	-0.102823285	4.794353431
2000-0324-HRV	Heat_wave	2000	324	35	Degree_C	2000	6		2000	6		40	200	240000	-0.700364	-0.102823285	4.794353431
2005-0756-ROU	Heat_wave	2005	756	36	Degree_C	2005	7	27	2005	8	1	13	500	29698.52437	-1.21959	-0.078549152	4.842901696
1997-0343-CHN	Heat_wave	1997	343	36	Degree_C	1997	7	9	1997	7	9	16	180	26053.05216	-1.386397	-0.078549152	4.842901696
2006-0348-ROU	Heat_wave	2006	348	36	Degree_C	2006	6	29	2006	7		26	200	29372.03299	-1.207704	-0.078549152	4.842901696
2018-0195-CAN	Heat_wave	2018	195	37	Degree_C	2018	6	29	2018	7	5	70	62375.55499	96450.72487	0.4172283	-0.05427502	4.89144996
2018-0256-PRK	Heat_wave	2018	256	38	Degree_C	2018	7	11	2018	8	3	21.68677547	13768	58262.27349	-0.30056727	-0.030000887	4.939998225
1998-0212-USA	Heat_wave	1998	212	38	Degree_C	1998	5	1	1998	7	20	130	199814.275	4275000	1.5174304	-0.030000887	4.939998225
2000-0433-USA	Heat_wave	2000	433	38	Degree_C	2000	7		2000	7		35	37544.69427	76463.43578	0.08065987	-0.030000887	4.939998225
2004-0310-CHN	Heat_wave	2004	310	39	Degree_C	2004	7	2	2004	7	3	39	40641.29363	79286.39884	0.13320473	-0.005726755	4.98854649
2005-0339-CHN	Heat_wave	2005	339	39	Degree_C	2005	7		2005	7		4.837495683	200	20636.39436	-1.7434455	-0.005726755	4.98854649
2014-0578-JPN	Heat_wave	2014	578	39	Degree_C	2014	7	14	2014	7	29	27	17000	63242.50252	-0.18267588	-0.005726755	4.98854649
1998-0250-ROU	Heat_wave	1998	250	39	Degree_C	1998	8	3	1998	8	3	20	24920.36344	63391.4517	-0.19107026	-0.005726755	4.98854649
1990-0085-FRA	Heat_wave	1990	85	40	Degree_C	1990	7	24	1990	7	24	5	9028.646293	39840.73194	-0.8642071	0.018547377	5.037094754
1999-0246-USA	Heat_wave	1999	246	40	Degree_C	1999	7		1999	8		257	235829.6374	1000000	1.4733058	0.018547377	5.037094754
1996-0362-ROU	Heat_wave	1996	362	40	Degree_C	1996	7	4	1996	7	4	16	200	26526.26664	-1.3623729	0.018547377	5.037094754
1996-0153-PAK	Heat_wave	1996	153	40	Degree_C	1996	6	19	1996	6	19	32	35159.77434	74201.96339	0.03714741	0.018547377	5.037094754
2006-0383-ESP	Heat_wave	2006	383	40	Degree_C	2006	7	15	2006	8	4	2409	1019230.055	561897.8003	2.2813263	0.018547377	5.037094754
1980-0357-IND	Heat_wave	1980	357	40	Degree_C	1980	4	29	1980	4	29	50	48752.21859	86168.6683	0.2538491	0.018547377	5.037094754
2013-0549-GBR	Heat_wave	2013	549	40	Degree_C	2013	7		2013	7		760	357720.0365	214433.7222	1.5752165	0.018547377	5.037094754
2012-0214-USA	Heat_wave	2012	214	40	Degree_C	2012	6	30	2012	7	19	123	94254.95572	116498.7494	0.6909363	0.018547377	5.037094754
2010-0372-RUS	Heat_wave	2010	372	40	Degree_C	2010	6		2010	8		55736	7069869.708	400000	3.478818	0.018547377	5.037094754
2004-0352-JPN	Heat_wave	2004	352	40	Degree_C	2004	7		2004	8		10	300	25758.23971	-1.4196494	0.018547377	5.037094754
2015-0410-FRA	Heat_wave	2015	410	40	Degree_C	2015	6	29	2015	8	9	3275	1042697.336	349808.4837	2.2845087	0.018547377	5.037094754
2018-0226-JPN	Heat_wave	2018	226	41	Degree_C	2018	7	1	2018	7	15	119	49000	103459.0757	0.5312385	0.04282151	5.085643019
1987-0596-GRC	Heat_wave	1987	596	41	Degree_C	1987	7	20	1987	7	31	1000	437352.9106	235084.0479	1.7084736	0.04282151	5.085643019
2007-0358-JPN	Heat_wave	2007	358	41	Degree_C	2007	8		2007	8	17	62	3000	55986.70398	-0.31336862	0.04282151	5.085643019
2013-0316-JPN	Heat_wave	2013	316	41	Degree_C	2013	5		2013	9		338	54000	130960.3107	0.8859576	0.04282151	5.085643019
2004-0361-SPI	Heat_wave	2004	361	42	Degree_C	2004	7	26	2004	7	30	13	113	23034.90765	-1.5587032	0.067095642	5.134191284
2000-0383-SCG	Heat_wave	2000	383	42	Degree_C	2000	7		2000	7		3	70	15602.18828	-2.1350327	0.067095642	5.134191284
2019-0217-IND	Heat_wave	2019	217	42	Degree_C	2019	6		2019	6		90	74980.57182	104923.1456	0.539258	0.067095642	5.134191284
2018-0143-PAK	Heat_wave	2018	143	42	Degree_C	2018	5	18	2018	5	22	180	124570.3254	132349.7086	0.87582654	0.067095642	5.134191284
2000-0471-JOR	Heat_wave	2000	471	43	Degree_C	2000	7		2000	7		1.784166881	12	10350.46946	-2.7027118	0.091369774	5.182739549
1998-0241-CYP	Heat_wave	1998	241	43	Degree_C	1998	8	10	1998	8	10	52	100	30177.96158	-1.144937	0.091369774	5.182739549
2000-0398-CYP	Heat_wave	2000	398	43	Degree_C	2000	7		2000	7		5	400	23392.44891	-1.5748696	0.091369774	5.182739549
2002-0531-CHN	Heat_wave	2002	531	43	Degree_C	2002	7		2002	7		7	3500	36365.26011	-0.9730955	0.091369774	5.182739549
2003-0391-ESP	Heat_wave	2003	391	43	Degree_C	2003	8	1	2003	8	11	34580	9113321.43	5280000	3.8701596	0.091369774	5.182739549
2000-0382-BGR	Heat_wave	2000	382	43	Degree_C	2000	6		2000	7		7	3002.606287	50	-2.216427	0.091369774	5.182739549
2000-0380-ROU	Heat_wave	2000	380	43	Degree_C	2000	7		2000	7		6	100	19179.43646	-1.8328873	0.091369774	5.182739549
2004-0333-ALB	Heat_wave	2004	333	43	Degree_C	2004	7	1	2004	7		45	57443.01321	161237.3291	0.37196204	0.091369774	5.182739549
1994-0645-AUS	Heat_wave	1994	645	44	Degree_C	1994	12		1994	12		99.09028991	1000034	166669.6127	1.1606059	0.115643907	5.231287813
2000-0379-GRC	Heat_wave	2000	379	44	Degree_C	2000	7		2000	7		27	176	3000	-1.6423137	0.115643907	5.231287813
1996-0367-EGY	Heat_wave	1996	367	44	Degree_C	1996	7	7	1996	7	7	22	26722.01514	65448.26845	-0.14479096	0.115643907	5.231287813
2019-0366-BEL	Heat_wave	2019	366	44	Degree_C	2019	7	19	2019	7	27	1668	841398.5942	570082.1685	2.143403	0.115643907	5.231287813
2006-0427-USA	Heat_wave	2006	427	44	Degree_C	2006	7	30	2006	8	6	24	28480.29466	67384.21327	-0.10254122	0.115643907	5.231287813
2007-0207-IND	Heat_wave	2007	207	45	Degree_C	2007	4		2007	6		72	63675.82741	97365.32339	0.43090716	0.139918039	5.279836078
2016-0036-ZAF	Heat_wave	2016	36	45	Degree_C	2016	1	1	2016	1	10	11	20	16545.24592	-2.0067708	0.139918039	5.279836078
2015-0232-PAK	Heat_wave	2015	232	45	Degree_C	2015	6	18	2015	6	24	1229	80000	183645.0571	1.3868256	0.139918039	5.279836078
2007-0235-AUT	Heat_wave	2007	235	46	Degree_C	2007	7		2007	7		571.8545909	351514.6027	517667.396	1.6544234	0.164192171	5.328384343
2010-0057-BRA	Heat_wave	2010	57	46	Degree_C	2010	2		2010	2		32	35159.77434	74201.96339	0.03714741	0.164192171	5.328384343
2013-0208-IND	Heat_wave	2013	208	46	Degree_C	2013	4	1	2013	5	30	557	284907.2555	193231.9888	1.4243253	0.164192171	5.328384343
1995-0355-EGY	Heat_wave	1995	355	46	Degree_C	1995	6	12	1995	6	12	32	35159.77434	74201.96339	0.03714741	0.164192171	5.328384343
1998-0204-ITA	Heat_wave	1998	204	46	Degree_C	1998	7	4	1998	7	4	10	14999.90508	50254.96853	-0.52763873	0.164192171	5.328384343
1997-0334-PAK	Heat_wave	1997	334	46	Degree_C	1997	6	16	1997	6	16	100	80995.37765	108692.8731	0.59041727	0.164192171	5.328384343
1985-0069-IND	Heat_wave	1985	69	46	Degree_C	1985	6	6	1985	6	6	103	82767.88572	109774.5903	0.60477006	0.164192171	5.328384343
2019-0296-BEL	Heat_wave	2019	296	46	Degree_C	2019	6	21	2020	7	1	699	393357.8772	349422.6394	1.6603632	0.164192171	5.328384343
2000-0381-TUR	Heat_wave	2000	381	46	Degree_C	2000	6		2000	7		11	300	1000	-1.991116	0.164192171	5.328384343
2000-0351-PAK	Heat_wave	2000	351	46	Degree_C	2000	6		2000	6		24	28480.29466	67384.21327	-0.10254122	0.164192171	5.328384343
1995-0157-ESP	Heat_wave	1995	157	47	Degree_C	1995	7	25	1995	7	25	30	70	25297.89259	-1.4014945	0.188466304	5.376932607
2003-0785-DZA	Heat_wave	2003	785	47	Degree_C	2003	6	21	2003	7	21	40	41401.89627	79961.76829	0.14549807	0.188466304	5.376932607
1999-0125-IND	Heat_wave	1999	125	47	Degree_C	1999	4		1999	4		140	103628.7533	121662.6252	0.75379664	0.188466304	5.376932607
2005-0687-USA	Heat_wave	2005	687	47	Degree_C	2005	7	4	2005	7	30	33	31	22456.2884	-1.5568539	0.188466304	5.376932607
2015-0342-EGY	Heat_wave	2015	342	47	Degree_C	2015	8	9	2015	8	9	110	66	32897.1615	-1.0009966	0.188466304	5.376932607
2011-0329-ITA	Heat_wave	2011	329	47	Degree_C	2011	8	17	2011	8	24	10	14999.90508	50254.96853	-0.52763873	0.188466304	5.376932607
2018-0235-ESP	Heat_wave	2018	235	47	Degree_C	2018	8		2018	8		9	13885.99496	48512.00558	-0.578798	0.188466304	5.376932607
2015-0393-SDN	Heat_wave	2015	393	47	Degree_C	2015	8	13	2015	8	15	16	21163.14513	58825.23911	-0.2994211	0.188466304	5.376932607
2017-0144-IND	Heat_wave	2017	144	48	Degree_C	2017	4	12	2017	6	15	264	164903.9414	150469.2267	1.0617943	0.212740436	5.425480872
2009-0175-IND	Heat_wave	2009	175	48	Degree_C	2009	4	14	2009	6	26	120	25	28383.14974	-1.1946324	0.212740436	5.425480872
2015-0189-IND	Heat_wave	2015	189	48	Degree_C	2015	5	20	2015	5	31	2248	791548.7907	308377.5014	2.1018016	0.212740436	5.425480872
2010-0206-IND	Heat_wave	2010	206	49	Degree_C	2010	3		2010	5		250	158452.9315	147747.3726	1.0353367	0.237014568	5.474029137
2009-0616-AUS	Heat_wave	2009	616	49	Degree_C	2009	1	27	2009	2	8	347	2000	74987.96504	0.14281888	0.237014568	5.474029137
2005-0323-IND	Heat_wave	2005	323	49	Degree_C	2005	6		2005	6		329	193749.1795	161984.3654	1.1686714	0.237014568	5.474029137
1994-0624-IND	Heat_wave	1994	624	49	Degree_C	1994	5		1994	5		161	114797.8344	127494.7546	0.8216603	0.237014568	5.474029137
1998-0217-IND	Heat_wave	1998	217	50	Degree_C	1998	5	26	1998	5	26	2541	865856.5851	321298.4636	2.1612914	0.261288701	5.522577401
2002-0284-PAK	Heat_wave	2002	284	50	Degree_C	2002	5		2002	5		113	24	27832.53254	-1.223088	0.261288701	5.522577401
2002-0290-IND	Heat_wave	2002	290	50	Degree_C	2002	5	10	2002	5	22	1030	446923.927	237423.6065	1.7228262	0.261288701	5.522577401
2003-0250-BGD	Heat_wave	2003	250	50	Degree_C	2003	5	10	2003	6	12	1472	743385.2895	629712.666	2.1023831	0.261288701	5.522577401
1995-0112-IND	Heat_wave	1995	112	50	Degree_C	1995	5	8	1995	6	21	558	285281.7831	193348.146	1.4251963	0.261288701	5.522577401
2005-0347-PAK	Heat_wave	2005	347	50	Degree_C	2005	6	13	2005	6	28	106	200	39449.55369	-0.76000166	0.261288701	5.522577401
2011-0264-USA	Heat_wave	2011	264	50	Degree_C	2011	7	19	2011	7	22	22	26722.01514	65448.26845	-0.14479096	0.261288701	5.522577401
2006-0254-PAK	Heat_wave	2006	254	50	Degree_C	2006	5		2006	5		84	100	33373.88584	-0.99215865	0.261288701	5.522577401
2006-0387-USA	Heat_wave	2006	387	50	Degree_C	2006	7	14	2006	8	15	164	116360.5669	128285.7783	0.83062476	0.261288701	5.522577401
2000-0487-MAR	Heat_wave	2000	487	51	Degree_C	2000	8		2000	8		10.34320439	6763.80518	809	-1.4349723	0.285562833	5.571125666
2016-0133-IND	Heat_wave	2016	133	51	Degree_C	2016	4	1	2016	5	20	300	181088.297	157053.3597	1.1238658	0.285562833	5.571125666
2014-0010-AUS	Heat_wave	2014	10	52	Degree_C	2014	1	13	2014	1	18	139	103086.1296	121370.7914	0.75031596	0.309836965	5.619673931
1991-0279-PAK	Heat_wave	1991	279	53	Degree_C	1991	6	1	1991	6	15	523	250	57292.77373	-0.20063533	0.334111098	5.668222196
2002-0291-IDN	Riverine_flood	2002	291	2	km^2	2002	5		2002	5		8.559101681	1000	30624.21746	-1.1946882	-1.443428632	2.113142735
1997-0156-PAK	Riverine_flood	1997	156	4	km^2	1997	7	25	1997	7	28	31	56	24519.7838	-1.4419293	-1.3584146	2.2831708
1994-0013-TZA	Riverine_flood	1994	13	5	km^2	1994	1	9	1994	1	13	31	7000	55945.69111	-0.3409865	-1.331046191	2.337907617
2001-0524-MLI	Riverine_flood	2001	524	8	km^2	2001	8	18	2001	10	9	2	3500	27956.79913	-1.3721902	-1.273400568	2.453198865
1996-0072-AFG	Riverine_flood	1996	72	9	km^2	1996	4	9	1996	4	23	70	9855	70371.4047	-0.003509584	-1.258954554	2.482090892
1995-0029-IDN	Riverine_flood	1995	29	9	km^2	1995	2	3	1995	2	17	47	36000	400	-0.81225497	-1.258954554	2.482090892
1997-0092-ECU	Riverine_flood	1997	92	10	km^2	1997	3	9	1997	3	19	27	13916	61116.23313	-0.22831936	-1.246032159	2.507935682
1999-0423-TGO	Riverine_flood	1999	423	10	km^2	1999	9	15	1999	10	11	37.59802104	65000	85252.05143	0.22861975	-1.246032159	2.507935682
2002-0708-PER	Riverine_flood	2002	708	16	km^2	2002	11	10	2002	11	10	4	350	21818.58915	-1.6764044	-1.188386535	2.623226929
1997-0301-UGA	Riverine_flood	1997	301	20	km^2	1997	11	14	1997	11	28	100	153500	1000	-0.14714952	-1.161018127	2.677963747
2001-0262-USA	Riverine_flood	2001	262	24	km^2	2001	2	27	2001	3	1	4.837495683	200	20636.39436	-1.7434455	-1.138656512	2.722686975
1999-0351-ETH	Riverine_flood	1999	351	35	km^2	1999	8	23	1999	9	9	11.933835	6755	2700	-1.1732877	-1.092381622	2.815236757
1993-0520-ETH	Riverine_flood	1993	520	35	km^2	1993	8		1993	8		2	30000	40354.91505	-0.88230836	-1.092381622	2.815236757
2002-0478-PRK	Riverine_flood	2002	478	37	km^2	2002	8	5	2002	8	11	36.20698577	58443	83057.41351	0.19236334	-1.085566042	2.828867916
1994-0060-CUB	Riverine_flood	1994	60	38	km^2	1994	5	18	1994	5	18	12	38600	61366.50505	-0.25403166	-1.082295192	2.835409616
2007-0281-HTI	Riverine_flood	2007	281	44	km^2	2007	7	23	2007	7	24	4	1500	27977.29407	-1.3445725	-1.064314361	2.871371277
2002-0274-TZA	Riverine_flood	2002	274	50	km^2	2002	4	26	2002	5	28	9	1200	31927.99588	-1.1371139	-1.048635686	2.902728629
1999-0225-BGD	Riverine_flood	1999	225	60	km^2	1999	7	11	1999	8	3	31	441270	113559.4585	0.6038629	-1.026274071	2.947451857
2006-0391-MRT	Riverine_flood	2006	391	60	km^2	2006	7	22	2006	7	24	7	1619	31877.45377	-1.148887	-1.026274071	2.947451857
2002-0488-GBR	Riverine_flood	2002	488	60	km^2	2002	8	10	2002	8	12	5.235743542	250	21797.27656	-1.6673621	-1.026274071	2.947451857
1995-0300-ALB	Riverine_flood	1995	300	60	km^2	1995	12	27	1995	12	27	10.94342145	2000	36299.1456	-0.9583512	-1.026274071	2.947451857
1994-0048-FRA	Riverine_flood	1994	48	70	km^2	1994	1	7	1994	1	12	10	210	5000	-1.7915822	-1.007367619	2.985264763
1997-0097-AFG	Riverine_flood	1997	97	71	km^2	1997	5	12	1997	5	15	40	20000	70614.92825	-0.020406557	-1.005627844	2.988744312
1998-0612-LKA	Riverine_flood	1998	612	75	km^2	1998	12	28	1999	1		2	229485	57129.72866	-0.41837353	-0.998905663	3.002188675
1986-0003-BOL	Riverine_flood	1986	3	80	km^2	1986	1	6	1986	1	6	29	310000	50000	0.36476022	-0.990990062	3.018019876
2000-0865-USA	Riverine_flood	2000	865	86	km^2	2000	11	2	2000	11	2	3.846496628	100	20000	-1.9496282	-0.982120006	3.035759987
1988-0387-SLV	Riverine_flood	1988	387	95	km^2	1988	8	24	1988	8	24	33	39060	76037.1451	0.070936985	-0.969912751	3.060174498
2000-0196-SCG	Riverine_flood	2000	196	100	km^2	2000	4	5	2000	4	25	13.99194418	4000	43025.68622	-0.72201437	-0.963621653	3.072756693
1991-0169-BEN	Riverine_flood	1991	169	100	km^2	1991	6		1991	6		3	6210.790717	33573.99998	-1.1122466	-0.963621653	3.072756693
2004-0202-COL	Riverine_flood	2004	202	108	km^2	2004	1		2004	6	28	79	186096	119243.8635	0.70500445	-0.954182434	3.091635132
2002-0171-SPI	Riverine_flood	2002	171	110	km^2	2002	3	31	2002	4	2	16	430	79923	-1.0088443	-0.951931921	3.096136159
2005-0131-POL	Riverine_flood	2005	131	110	km^2	2005	3	17	2005	3	26	2	3600	28091.67699	-1.3657668	-0.951931921	3.096136159
1998-0316-VNM	Riverine_flood	1998	316	110	km^2	1998	10	16	1998	10	23	45	32505	13700	-0.19389425	-0.951931921	3.096136159
2004-0259-MEX	Riverine_flood	2004	259	120	km^2	2004	6	12	2004	6	12	1	350	3600	-2.396209	-0.941260039	3.117479922
1999-0182-DEU	Riverine_flood	1999	182	121	km^2	1999	5	11	1999	6	30	7	100000	430000	0.14065932	-0.940242188	3.119515625
2001-0079-ROU	Riverine_flood	2001	79	124	km^2	2001	3	4	2001	3	17	12.34239897	4000	15000	-0.9511401	-0.937238404	3.125523193
1988-0386-TCD	Riverine_flood	1988	386	124	km^2	1988	8	24	1988	8	24	43	47498	83112.59851	0.19985828	-0.937238404	3.125523193
2007-0241-PAK	Riverine_flood	2007	241	130	km^2	2007	6	28	2007	7	22	130	2000	61023.00759	-0.16995166	-0.931442839	3.137114322
2002-0829-VUT	Riverine_flood	2002	829	146	km^2	2002	12	21	2002	12	25	12.63672486	3001	40097.79637	-0.81998956	-0.917206665	3.16558667
2004-0236-BRA	Riverine_flood	2004	236	150	km^2	2004	6	1	2004	6	2	28	2254	370	-1.5162325	-0.91389163	3.172216739
2005-0165-MDG	Riverine_flood	2005	165	150	km^2	2005	3	24	2005	3	26	4	900	25639.14903	-1.46105	-0.91389163	3.172216739
1986-0096-BGD	Riverine_flood	1986	96	196	km^2	1986	8	2	1986	8	2	4	100000	57334.27987	-0.38696384	-0.881085461	3.237829078
2004-0398-ZAF	Riverine_flood	2004	398	199	km^2	2004	8	7	2004	8	9	22.35583125	15000	59499.89466	-0.27134576	-0.879222402	3.241555195
2001-0549-GIN	Riverine_flood	2001	549	200	km^2	2001	8	18	2001	10	9	9	220000	77774.78387	0.05115827	-0.878607621	3.242784758
1989-0037-YMD	Riverine_flood	1989	37	200	km^2	1989	3	19	1989	3	19	25	340000	33000	0.26486787	-0.878607621	3.242784758
2002-0533-RUS	Riverine_flood	2002	533	200	km^2	2002	7	20	2002	7	26	9.882305792	1500	33826.23118	-1.0564399	-0.878607621	3.242784758
1996-0215-LAO	Riverine_flood	1996	215	200	km^2	1996	8	15	1996	8	15	30	420000	111832.6814	0.5821524	-0.878607621	3.242784758
2001-0307-PRI	Riverine_flood	2001	307	245	km^2	2001	5	6	2001	5	7	2	9480	146000	-0.87199783	-0.853717052	3.292565896
1994-0208-NGA	Riverine_flood	1994	208	270	km^2	1994	9	11	1994	9	15	30	580000	66500	0.549894	-0.841799993	3.316400014
2004-0098-IDN	Riverine_flood	2004	98	280	km^2	2004	2	18	2004	2	23	5	13000	60000	-0.71716374	-0.837339554	3.325320892
1999-0574-VNM	Riverine_flood	1999	574	288	km^2	1999	12	2	1999	12	10	127	2163694	53000	1.1708298	-0.833884392	3.332231215
2007-0010-ZMB	Riverine_flood	2007	10	290	km^2	2007	1	10	2007	5	10	4	1400000	89996.67517	0.2147892	-0.833035618	3.333928765
2008-0041-BRA	Riverine_flood	2008	41	290	km^2	2008	2	2	2008	2	6	9	12870	47886.33021	-0.59612334	-0.833035618	3.333928765
2000-0083-ZWE	Riverine_flood	2000	83	295	km^2	2000	1	26	2000	3	27	70	266000	72900	0.65076554	-0.830938975	3.33812205
2000-0770-IDN	Riverine_flood	2000	770	300	km^2	2000	11	28	2000	12	4	100	386021	34000	0.6833769	-0.828877598	3.342244804
1997-0270-ETH	Riverine_flood	1997	270	300	km^2	1997	10	26	1997	11	26	297	65000	131555.2682	0.8870372	-0.828877598	3.342244804
2004-0591-UGA	Riverine_flood	2004	591	300	km^2	2004	11	8	2004	11	10	19.36246961	10000	53867.59724	-0.40959394	-0.828877598	3.342244804
1988-0400-BEN	Riverine_flood	1988	400	300	km^2	1988	9		1988	9		41.1763487	84000	90785.96931	0.3160524	-0.828877598	3.342244804
2005-0591-CAN	Riverine_flood	2005	591	330	km^2	2005	9	27	2005	9	29	7.141271984	600	27018.03711	-1.3688604	-0.817187865	3.36562427
2005-0448-SEN	Riverine_flood	2005	448	330	km^2	2005	8	20	2005	9	10	34.25850122	50000	79939.01558	0.13916346	-0.817187865	3.36562427
2004-0268-NGA	Riverine_flood	2004	268	340	km^2	2004	6	17	2004	6	18	8.559101681	1000	30624.21746	-1.1946882	-0.813526431	3.372947137
2007-0173-USA	Riverine_flood	2007	173	341	km^2	2007	5	24	2007	5	29	8	100	20373.25097	-1.74124	-0.81316623	3.37366754
2009-0013-FJI	Riverine_flood	2009	13	348	km^2	2009	1	8	2009	1	19	12	10556	43247	-0.5733149	-0.810674003	3.378651994
1994-0088-RUS	Riverine_flood	1994	88	350	km^2	1994	3	1	1994	3	1	1	10204	29019.80276	-1.3490239	-0.809971145	3.380057709
1993-0221-PHL	Riverine_flood	1993	221	360	km^2	1993	11	29	1993	12	1	25	4	14931.22495	-2.1122105	-0.806515984	3.386968033
2003-0557-VNM	Riverine_flood	2003	557	362	km^2	2003	11	11	2003	11	14	61	194049	35000	0.41515556	-0.805836519	3.388326961
[truncated: 1,864 more rows]
